# Supplementary material for: A prospective analysis of optimal total weight gain ranges and trimester-specific weight gain rates for Chinese pregnant women
Source: Springer Nature journal article supplement (doi:10.1186/s12884-023-05398-8), 2023-01-24
Supplement: MOESM1 [file 23949716]

**Additional file 1: Figure S1.** The age category specified maternal pre-gravid BMI distribution according to WHO classifications for Asian population

**Figure S2.** The growth curve for gestational weight gain  
(PDF 143KB)

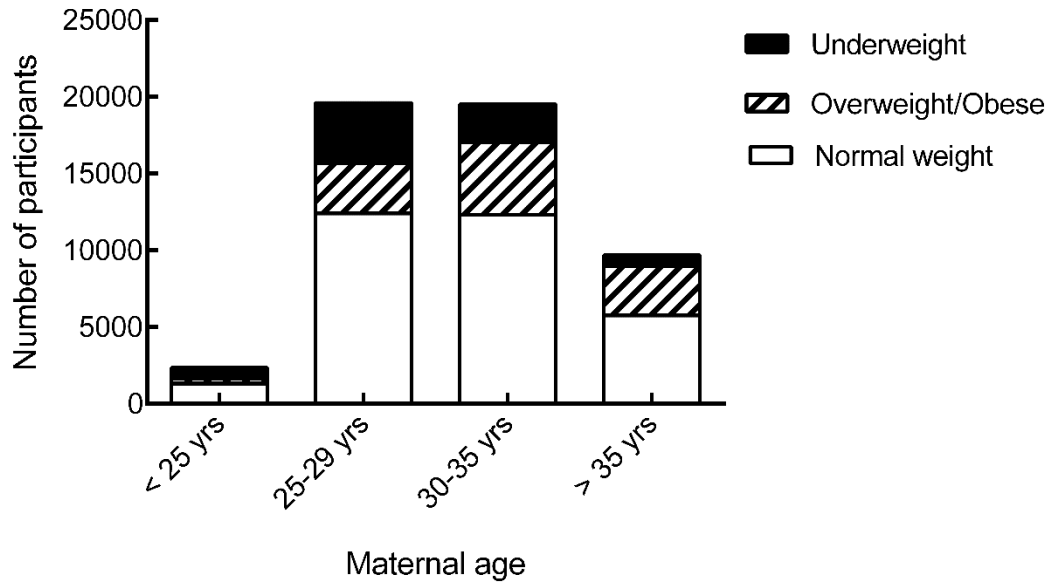

**Figure S1.** The age category specified maternal pre-gravid BMI distribution according to WHO classifications for Asian population

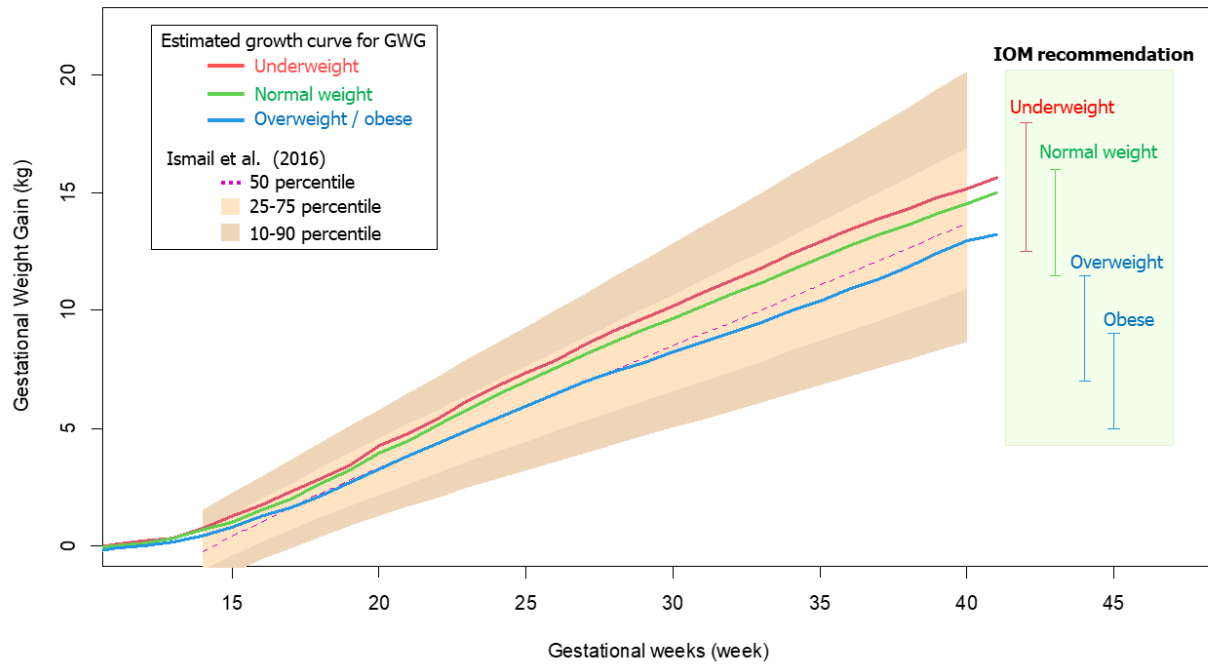

**Figure S2.** The growth curve for gestational weight gain

The brown area represents GWG growth curves for normal-weight mothers reported in the prospective multi-country study by Ismail et al (PMID: 26926301). The green area represents the IOM recommendation
