# Supplementary material for: A prospective analysis of optimal total weight gain ranges and trimester-specific weight gain rates for Chinese pregnant women
Source: Springer Nature journal article supplement (doi:10.1186/s12884-023-05398-8), 2023-01-24
Supplement: MOESM2 [file 23949716]

**Additional file 2: Table S1.** Separated predicted probability of whole pregnant GWG on neonatal outcomes in 51,125 offspring.

**Table S2.** Separated predicted probability of whole pregnant GWG on maternal outcomes in 51,125 mothers.

**Table S3.** Optimal gestational weight gain for Chinese pregnant women at different maternal ages.

(PDF 127 KB)

**Table S1** Separated predicted probability of whole pregnant GWG on neonatal outcomes in 51,125 offspring

|                                  | Maternal Pre-gravid BMI category according to WHO Asian |                         |                            |
|----------------------------------|---------------------------------------------------------|-------------------------|----------------------------|
|                                  | Underweight (n=7805)                                    | Normal weight (n=31787) | Overweight/obese (n=11533) |
| <b>Stillbirth</b>                |                                                         |                         |                            |
| Lower 95% CI of GWG <sup>a</sup> | 0.002 [0.000 - 0.007]                                   | 0.005 [0.003 - 0.010]   | 0.010 [0.005 - 0.019]      |
| Mean GWG <sup>b</sup>            | 0.003 [0.001 - 0.006]                                   | 0.003 [0.002 - 0.005]   | 0.009 [0.006 - 0.015]      |
| Upper 95% CI GWG <sup>c</sup>    | 0.005 [0.002 - 0.011]                                   | 0.002 [0.001 - 0.004]   | 0.010 [0.004 - 0.024]      |
| <b>Preterm delivery</b>          |                                                         |                         |                            |
| Lower 95% CI of GWG              | 0.132 [0.104 - 0.166]                                   | 0.136 [0.121 - 0.153]   | 0.225 [0.197 - 0.255]      |
| Mean GWG                         | 0.085 [0.073 - 0.098]                                   | 0.099 [0.092 - 0.108]   | 0.199 [0.177 - 0.223]      |
| Upper 95% CI GWG                 | 0.093 [0.076 - 0.113]                                   | 0.109 [0.097 - 0.122]   | 0.240 [0.202 - 0.283]      |
| <b>Macrosomia</b>                |                                                         |                         |                            |
| Lower 95% CI of GWG              | 0.007 [0.004 - 0.011]                                   | 0.051 [0.044 - 0.059]   | 0.216 [0.193 - 0.241]      |
| Mean GWG                         | 0.022 [0.017 - 0.029]                                   | 0.095 [0.089 - 0.102]   | 0.296 [0.278 - 0.315]      |
| Upper 95% CI GWG                 | 0.069 [0.057 - 0.083]                                   | 0.176 [0.164 - 0.188]   | 0.392 [0.358 - 0.428]      |
| <b>Large for gestational age</b> |                                                         |                         |                            |
| Lower 95% CI of GWG              | 0.073 [0.061 - 0.089]                                   | 0.212 [0.195 - 0.230]   | 0.488 [0.461 - 0.514]      |
| Mean GWG                         | 0.135 [0.123 - 0.148]                                   | 0.266 [0.255 - 0.277]   | 0.542 [0.521 - 0.562]      |
| Upper 95% CI GWG                 | 0.236 [0.216 - 0.258]                                   | 0.387 [0.370 - 0.404]   | 0.622 [0.591 - 0.653]      |
| <b>Small for gestational age</b> |                                                         |                         |                            |
| Lower 95% CI of GWG              | 0.199 [0.167 - 0.235]                                   | 0.163 [0.147 - 0.181]   | 0.119 [0.100 - 0.143]      |
| Mean GWG                         | 0.115 [0.102 - 0.129]                                   | 0.082 [0.075 - 0.089]   | 0.086 [0.073 - 0.101]      |
| Upper 95% CI GWG                 | 0.082 [0.067 - 0.100]                                   | 0.056 [0.048 - 0.066]   | 0.066 [0.048 - 0.091]      |

<sup>a</sup> Lower 95% CI of GWG, 97.5% mother gained over 5.0 kg gestational weight during pregnancy

<sup>b</sup> Mean GWG, the mean GWG for participants is 13.0 kg

<sup>c</sup> Higher 95% CI of GWG, 97.5% mother gained less than 20.0 kg gestational weight during pregnancy

*GWG* gestational weight gain, *BMI* body mass index, *WHO* World Health Organization, *CI* confidence interval

**Table S2** Separated predicted probability of whole pregnant GWG on maternal outcomes in 51,125 mothers

|                                  | Pre-gravid BMI category according to WHO Asian |                         |                            |
|----------------------------------|------------------------------------------------|-------------------------|----------------------------|
|                                  | Underweight (n=7805)                           | Normal weight (n=31787) | Overweight/obese (n=11533) |
| <b>GDM<sup>a</sup></b>           |                                                |                         |                            |
| Lower 95% CI of GWG <sup>b</sup> | 0.221 [0.196 - 0.247]                          | 0.330 [0.316 - 0.344]   | 0.607 [0.589 - 0.626]      |
| Mean GWG <sup>c</sup>            | 0.214 [0.197 - 0.232]                          | 0.345 [0.334 - 0.356]   | 0.620 [0.605 - 0.636]      |
| Upper 95% CI GWG <sup>d</sup>    | 0.230 [0.206 - 0.256]                          | 0.385 [0.369 - 0.401]   | 0.633 [0.607 - 0.659]      |
| <b>preeclampsia</b>              |                                                |                         |                            |
| Lower 95% CI of GWG              | 0.012 [0.006 - 0.025]                          | 0.027 [0.020 - 0.035]   | 0.129 [0.107 - 0.156]      |
| Mean GWG                         | 0.014 [0.010 - 0.020]                          | 0.027 [0.023 - 0.032]   | 0.129 [0.110 - 0.151]      |
| Upper 95% CI GWG                 | 0.025 [0.017 - 0.036]                          | 0.048 [0.040 - 0.058]   | 0.211 [0.173 - 0.255]      |
| <b>Cesarean delivery</b>         |                                                |                         |                            |
| Lower 95% CI of GWG              | 0.513 [0.482 - 0.543]                          | 0.660 [0.646 - 0.674]   | 0.794 [0.779 - 0.808]      |
| Mean GWG                         | 0.528 [0.513 - 0.543]                          | 0.634 [0.625 - 0.643]   | 0.783 [0.771 - 0.795]      |
| Upper 95% CI GWG                 | 0.566 [0.546 - 0.587]                          | 0.675 [0.662 - 0.687]   | 0.800 [0.780 - 0.818]      |

<sup>a</sup> Predicted probability of GWG on GDM was calculated from initial pregnant to 24wks of gestation, since medical intervened in pregnancy once gravid diagnosed GDM.

<sup>b</sup> Lower 95% CI of GWG, 97.5% mother gained over 5.0 kg gestational weight during pregnancy;

<sup>c</sup> Mean GWG, the mean GWG for participants is 13.0 kg;

<sup>d</sup> Lower 95% CI of GWG, 97.5% mother gained less than 20.0 kg gestational weight during pregnancy.

*GWG* gestational weight gain, *BMI* body mass index, *WHO* World Health Organization, *CI* confidence interval

**Table S3** Optimal gestational weight gain for Chinese pregnant women of different maternal ages

|                                            | Maternal age         |                     |                     |                    |
|--------------------------------------------|----------------------|---------------------|---------------------|--------------------|
|                                            | <25 yrs (n=2336)     | 25-29 yrs (n=19601) | 30-35 yrs (n=19513) | ≥35 yrs (n=9675)   |
| 1 <sup>st</sup> -2 <sup>nd</sup> trimester |                      |                     |                     |                    |
| Total weight gain (kg)                     | 7.54 [2.92, 11.26]   | 6.01 [0.59, 8.90]   | 5.32 [1.14, 8.13]   | 6.16 [2.81, 8.35]  |
| Rate of weight gain (kg/w)                 | 0.29 [0.11, 0.43]    | 0.23 [0.02, 0.34]   | 0.20 [0.04, 0.31]   | 0.24 [0.11, 0.32]  |
| 3 <sup>rd</sup> trimester                  |                      |                     |                     |                    |
| Total weight gain (kg)                     | 2.99 [1.91, 4.38]    | 2.34 [1.05, 5.41]   | 3.00 [1.51, 5.11]   | 2.37 [1.18, 3.88]  |
| Rate of weight gain (kg/w)                 | 0.21 [0.14, 0.31]    | 0.17 [0.08, 0.39]   | 0.21 [0.11, 0.37]   | 0.17 [0.08, 0.28]  |
| Whole pregnancy                            |                      |                     |                     |                    |
| Total weight gain (kg)                     | 12.77 [10.53, 14.67] | 9.70 [5.88, 12.71]  | 9.28 [6.34, 12.12]  | 8.63 [6.09, 11.16] |
| Rate of weight gain (kg/w)                 | 0.23 [0.26, 0.37]    | 0.24 [0.15, 0.32]   | 0.23 [0.16, 0.30]   | 0.22 [0.16, 0.28]  |
