# Supplementary material for: A prospective analysis of optimal total weight gain ranges and trimester-specific weight gain rates for Chinese pregnant women
Source: Springer Nature journal article supplement (doi:10.1186/s12884-023-05398-8), 2023-01-24
Supplement: MOESM3 [file 23949716]

**Additional file 3:** Predicted probability of each adverse pregnancy outcome and of aggregated adverse pregnancy outcome with increasing GWG by pre-gravid BMIs, maternal ages and trimesters. (PDF 1MB)

# Statistical Analysis Report

## Toshio SHIMOKAWA (Wakayama Medical University)

### 1. Evaluation of weight gain between pre and 24 weeks after pregnancy

- Generalized additive model (GAM) was used for predictive model of each disease.
- The above statistical model was applied to subsets of each age and BMI (ASIA).
- Reference weight gain = 5kg (Mean weight gain of mothers without any disease).

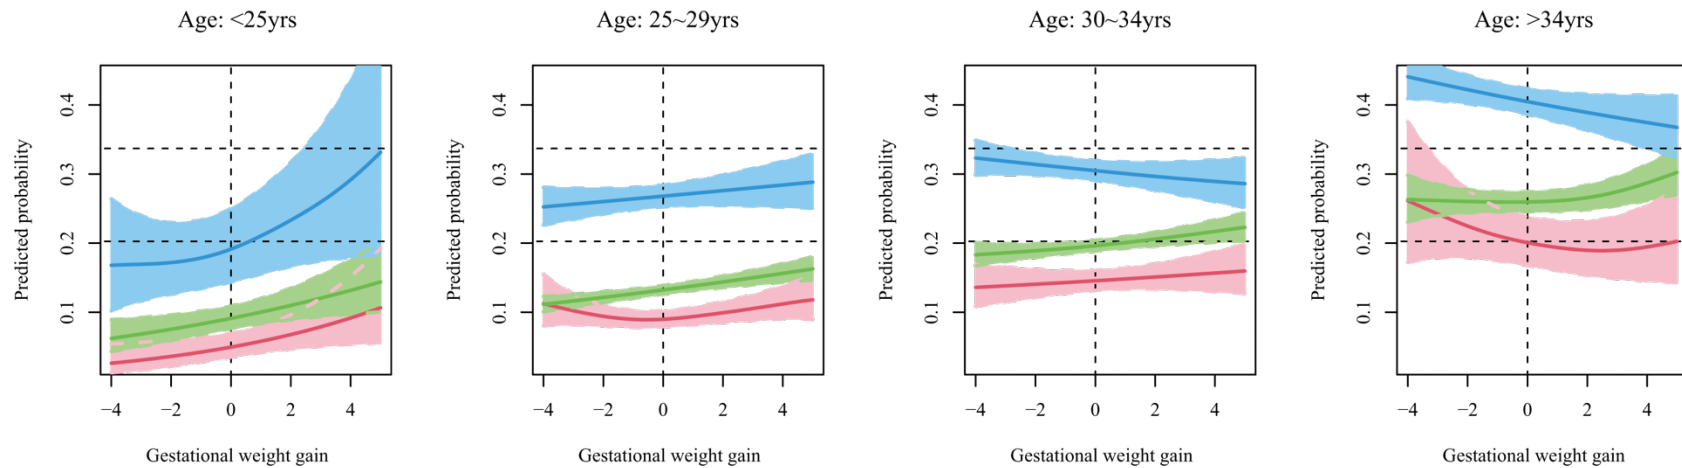

(a) Gestational diabetes mellitus (Red: Normal weight, Green: Underweight, Blue: Overweight/obese)

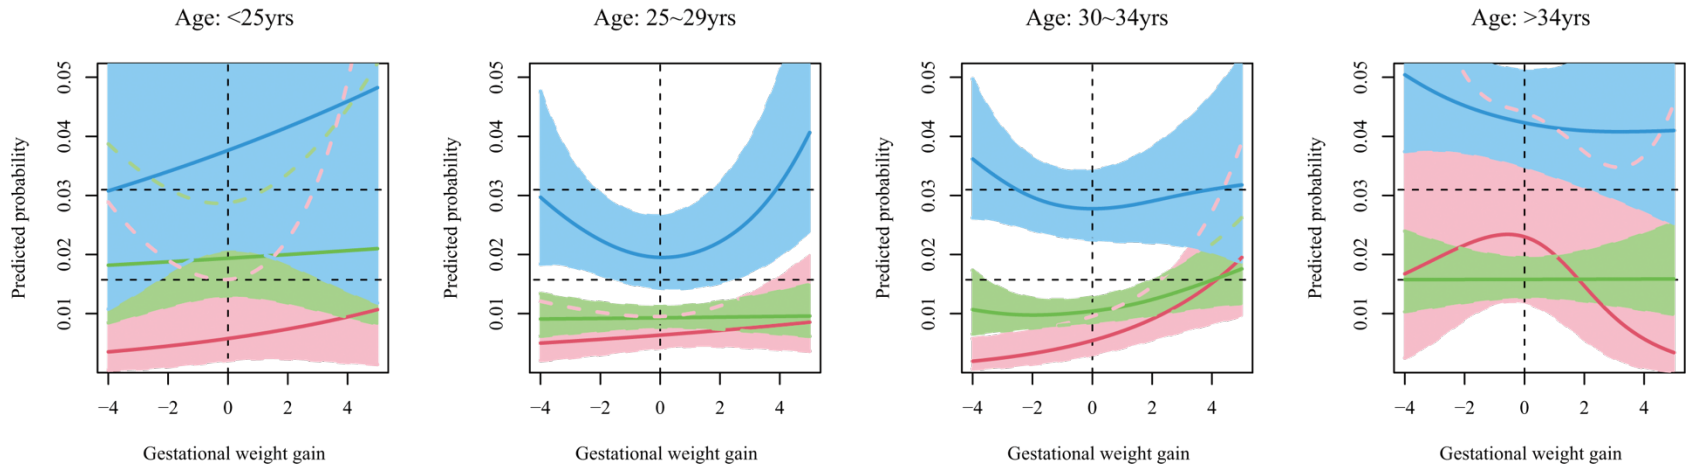

(b) **Preeclampsia** (Red: Normal weight, Green: Underweight, Blue: Overweight/obese)

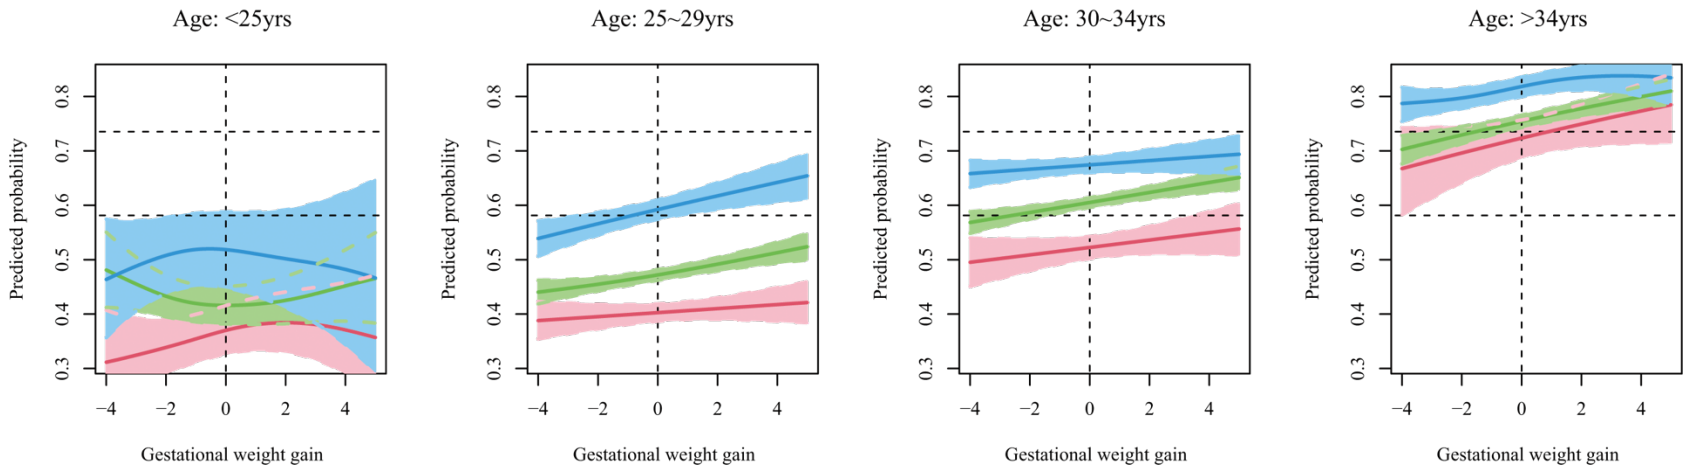

(c) **Cesarean delivery** (Red: Normal weight, Green: Underweight, Blue: Overweight/obese)

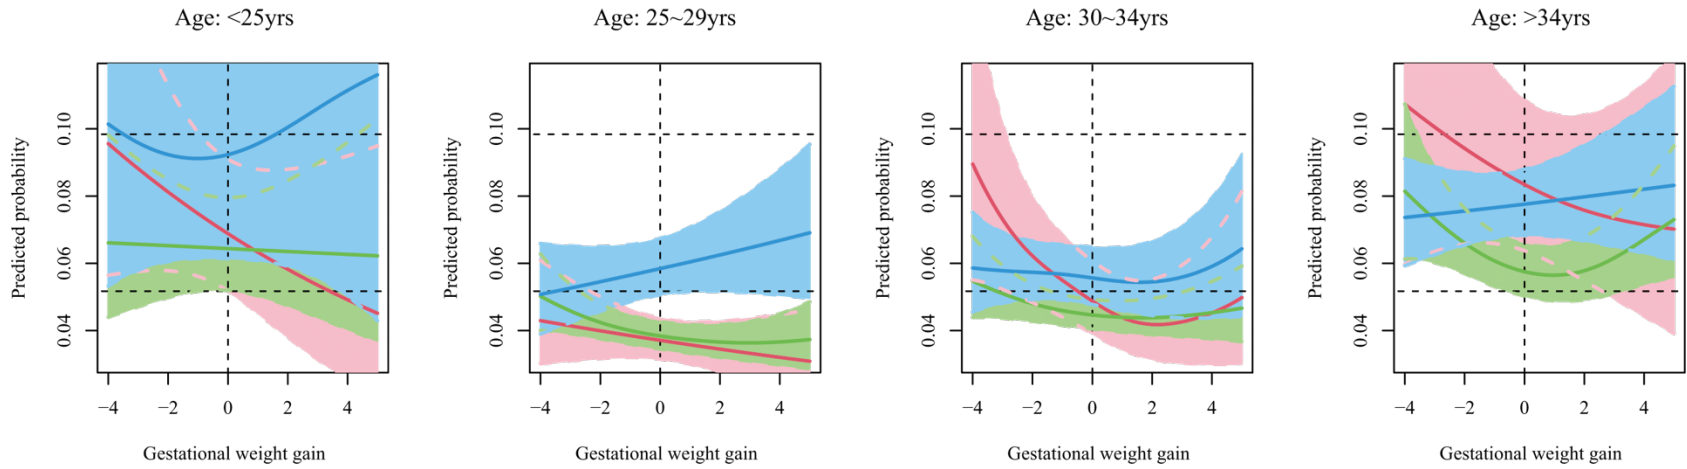

(d) **Preterm delivery** (Red: Normal weight, Green: Underweight, Blue: Overweight/obese)

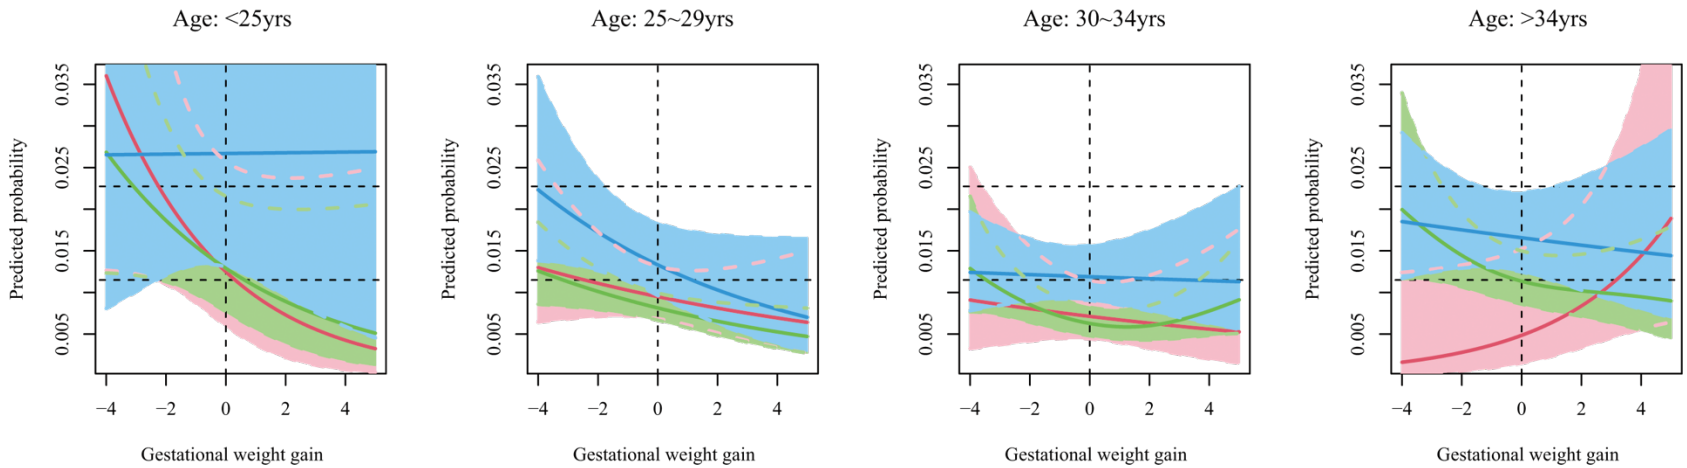

(e) **Stillbirth** (Red: Normal weight, Green: Underweight, Blue: Overweight/obese)



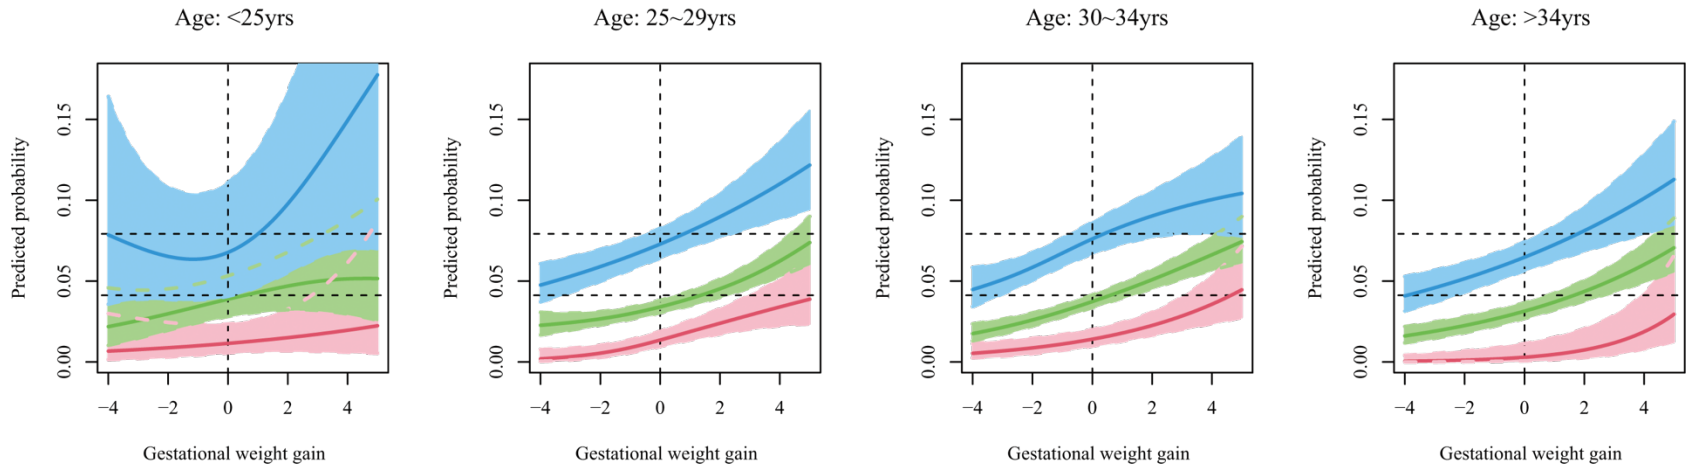

(f) **Macrosomia** (Red: Normal weight, Green: Underweight, Blue: Overweight/obese)

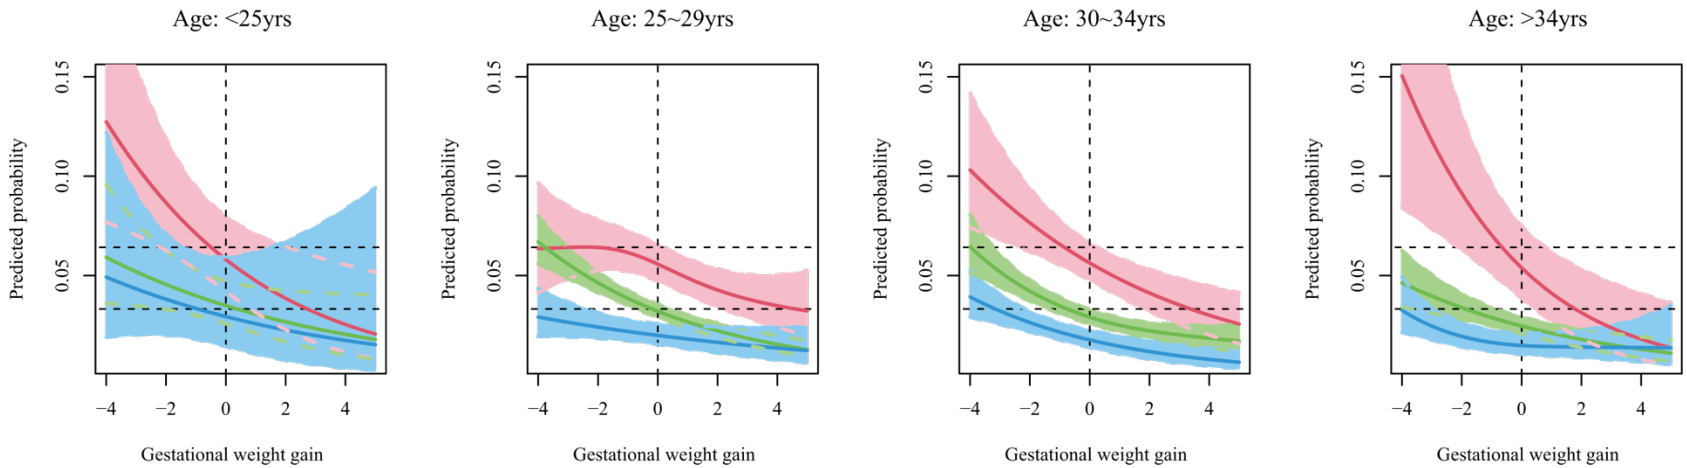

(g) **Small for gestational age** (Red: Normal weight, Green: Underweight, Blue: Overweight/obese)

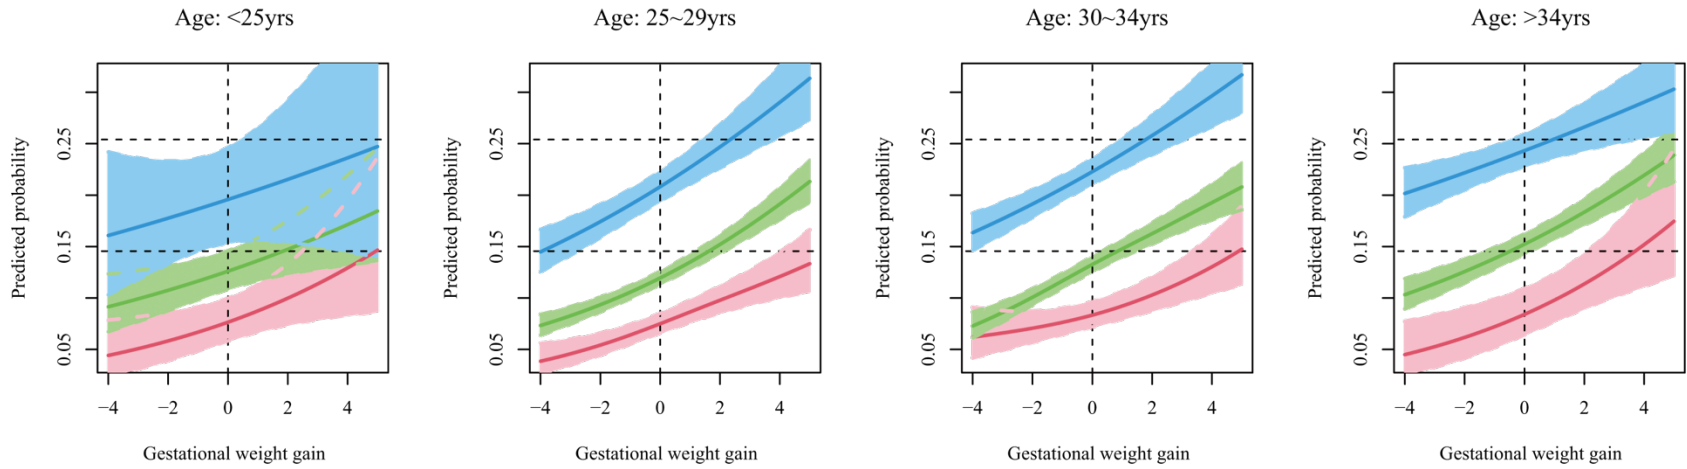

(h) **Large for gestational age** (Red: Normal weight, Green: Underweight, Blue: Overweight/obese)

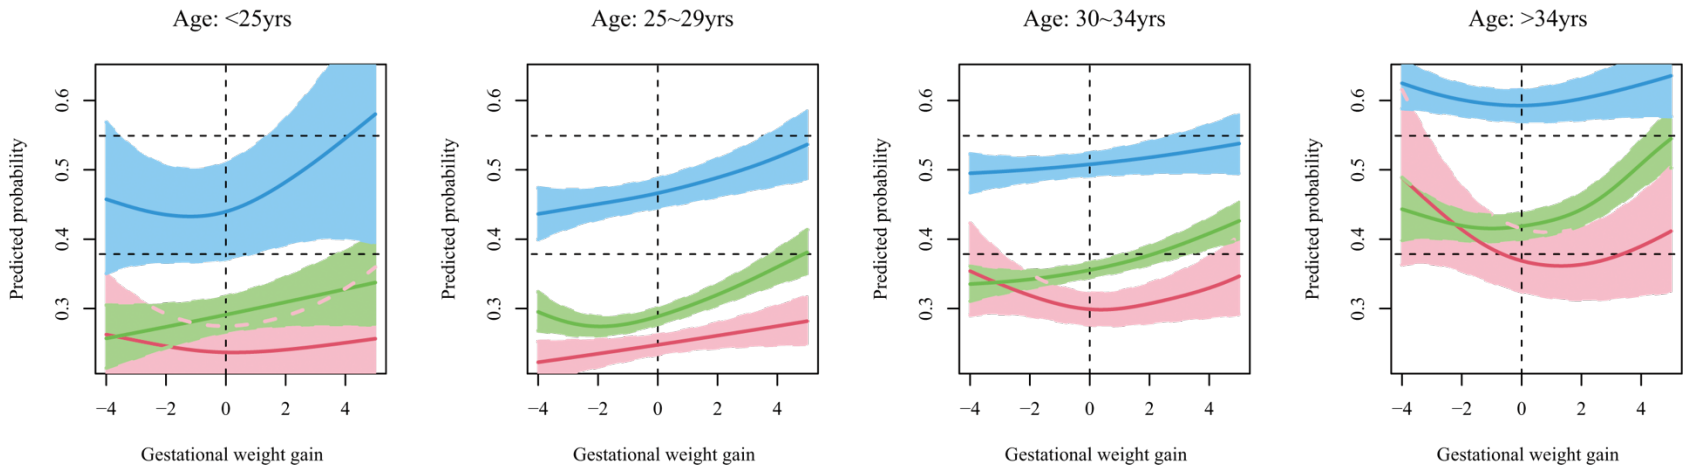

(i) **All disease** (Red: Normal weight, Green: Underweight, Blue: Overweight/obese)

# 1.1

## Gestational diabetes mellitus

| Age         |                             | <25 yrs                  |                               |  | 25-29 yrs                   |                          |                               |
|-------------|-----------------------------|--------------------------|-------------------------------|--|-----------------------------|--------------------------|-------------------------------|
| Weight gain | Normal weight<br>(n=1,324)  | Underweight<br>(n=698)   | Overweight/Obese<br>(n=314)   |  | Normal weight<br>(n=12,406) | Underweight<br>(n=3,943) | Overweight/Obese<br>(n=3,249) |
| -5.         | 0.022 [0.009 - 0.052]       | 0.056 [0.037 - 0.086]    | 0.164 [0.083 - 0.298]         |  | 0.125 [0.076 - 0.198]       | 0.107 [0.095 - 0.120]    | 0.249 [0.218 - 0.282]         |
| -4.5        | 0.024 [0.011 - 0.053]       | 0.059 [0.040 - 0.088]    | 0.166 [0.093 - 0.278]         |  | 0.119 [0.079 - 0.175]       | 0.109 [0.098 - 0.122]    | 0.251 [0.222 - 0.281]         |
| -4          | 0.026 [0.012 - 0.054]       | 0.062 [0.043 - 0.089]    | 0.167 [0.102 - 0.262]         |  | 0.113 [0.081 - 0.155]       | 0.111 [0.101 - 0.123]    | 0.252 [0.226 - 0.280]         |
| -3.5        | 0.028 [0.014 - 0.055]       | 0.065 [0.047 - 0.091]    | 0.168 [0.110 - 0.249]         |  | 0.107 [0.082 - 0.140]       | 0.114 [0.104 - 0.125]    | 0.254 [0.231 - 0.280]         |
| -3          | 0.031 [0.017 - 0.056]       | 0.069 [0.051 - 0.092]    | 0.169 [0.116 - 0.239]         |  | 0.102 [0.082 - 0.127]       | 0.116 [0.107 - 0.126]    | 0.256 [0.235 - 0.279]         |
| -2.5        | 0.033 [0.019 - 0.058]       | 0.072 [0.055 - 0.094]    | 0.170 [0.122 - 0.233]         |  | 0.098 [0.081 - 0.117]       | 0.119 [0.111 - 0.128]    | 0.258 [0.238 - 0.279]         |
| -2          | 0.036 [0.022 - 0.059]       | 0.075 [0.059 - 0.096]    | 0.172 [0.127 - 0.230]         |  | 0.094 [0.080 - 0.110]       | 0.122 [0.114 - 0.130]    | 0.260 [0.242 - 0.279]         |
| -1.5        | 0.039 [0.025 - 0.061]       | 0.079 [0.063 - 0.098]    | 0.175 [0.131 - 0.230]         |  | 0.091 [0.079 - 0.105]       | 0.124 [0.117 - 0.132]    | 0.262 [0.246 - 0.279]         |
| -1          | 0.042 [0.028 - 0.063]       | 0.083 [0.068 - 0.101]    | 0.179 [0.135 - 0.234]         |  | 0.090 [0.078 - 0.102]       | 0.127 [0.120 - 0.134]    | 0.264 [0.248 - 0.280]         |
| -0.5        | 0.046 [0.032 - 0.066]       | 0.087 [0.072 - 0.105]    | 0.185 [0.140 - 0.240]         |  | 0.089 [0.078 - 0.101]       | 0.130 [0.123 - 0.136]    | 0.266 [0.251 - 0.282]         |
| Mean        | 0.050 [0.035 - 0.069]       | 0.091 [0.076 - 0.109]    | 0.192 [0.145 - 0.250]         |  | 0.090 [0.079 - 0.102]       | 0.132 [0.126 - 0.138]    | 0.268 [0.253 - 0.284]         |
| 0.5         | 0.054 [0.039 - 0.074]       | 0.096 [0.080 - 0.114]    | 0.201 [0.150 - 0.263]         |  | 0.091 [0.080 - 0.104]       | 0.135 [0.129 - 0.141]    | 0.270 [0.254 - 0.287]         |
| 1           | 0.058 [0.042 - 0.080]       | 0.100 [0.083 - 0.120]    | 0.211 [0.156 - 0.278]         |  | 0.094 [0.082 - 0.107]       | 0.138 [0.132 - 0.145]    | 0.272 [0.254 - 0.290]         |
| 1.5         | 0.063 [0.045 - 0.087]       | 0.105 [0.086 - 0.127]    | 0.222 [0.162 - 0.296]         |  | 0.096 [0.084 - 0.111]       | 0.141 [0.134 - 0.148]    | 0.274 [0.255 - 0.294]         |
| 2           | 0.068 [0.047 - 0.096]       | 0.110 [0.089 - 0.135]    | 0.233 [0.167 - 0.316]         |  | 0.099 [0.085 - 0.115]       | 0.144 [0.136 - 0.152]    | 0.276 [0.255 - 0.299]         |
| 2.5         | 0.073 [0.049 - 0.107]       | 0.115 [0.091 - 0.144]    | 0.246 [0.171 - 0.340]         |  | 0.102 [0.087 - 0.120]       | 0.147 [0.138 - 0.156]    | 0.278 [0.254 - 0.303]         |
| 3           | 0.079 [0.051 - 0.120]       | 0.120 [0.093 - 0.154]    | 0.259 [0.175 - 0.367]         |  | 0.105 [0.088 - 0.125]       | 0.150 [0.140 - 0.161]    | 0.280 [0.254 - 0.308]         |
| 3.5         | 0.085 [0.052 - 0.135]       | 0.126 [0.095 - 0.164]    | 0.274 [0.177 - 0.398]         |  | 0.109 [0.090 - 0.131]       | 0.153 [0.142 - 0.165]    | 0.282 [0.253 - 0.313]         |
| 4           | 0.092 [0.054 - 0.152]       | 0.132 [0.097 - 0.176]    | 0.291 [0.180 - 0.435]         |  | 0.112 [0.090 - 0.138]       | 0.156 [0.143 - 0.170]    | 0.284 [0.252 - 0.318]         |
| 4.5         | 0.099 [0.055 - 0.171]       | 0.138 [0.099 - 0.189]    | 0.309 [0.181 - 0.475]         |  | 0.115 [0.091 - 0.146]       | 0.159 [0.145 - 0.175]    | 0.286 [0.252 - 0.324]         |
| 5           | 0.106 [0.056 - 0.192]       | 0.144 [0.100 - 0.202]    | 0.330 [0.182 - 0.520]         |  | 0.118 [0.090 - 0.154]       | 0.163 [0.147 - 0.180]    | 0.288 [0.251 - 0.329]         |
| Age         |                             | 30-34 yrs                |                               |  |                             | >34 yrs                  |                               |
| Weight gain | Normal weight<br>(n=12,302) | Underweight<br>(n=2,460) | Overweight/Obese<br>(n=4,749) |  | Normal weight<br>(n=5,750)  | Underweight<br>(n=704)   | Overweight/Obese<br>(n=3,221) |
| -5          | 0.133 [0.102 - 0.171]       | 0.179 [0.160 - 0.200]    | 0.327 [0.298 - 0.357]         |  | 0.277 [0.159 - 0.437]       | 0.265 [0.219 - 0.316]    | 0.448 [0.411 - 0.487]         |
| -4.5        | 0.134 [0.105 - 0.169]       | 0.181 [0.164 - 0.199]    | 0.325 [0.299 - 0.352]         |  | 0.268 [0.166 - 0.403]       | 0.264 [0.225 - 0.307]    | 0.444 [0.410 - 0.479]         |
| -4          | 0.135 [0.109 - 0.168]       | 0.182 [0.167 - 0.199]    | 0.323 [0.299 - 0.347]         |  | 0.259 [0.172 - 0.371]       | 0.263 [0.231 - 0.298]    | 0.440 [0.409 - 0.471]         |
| -3.5        | 0.137 [0.112 - 0.166]       | 0.184 [0.170 - 0.198]    | 0.320 [0.299 - 0.342]         |  | 0.250 [0.176 - 0.342]       | 0.262 [0.235 - 0.291]    | 0.435 [0.408 - 0.463]         |
| -3          | 0.138 [0.115 - 0.164]       | 0.186 [0.173 - 0.198]    | 0.318 [0.299 - 0.338]         |  | 0.241 [0.178 - 0.317]       | 0.262 [0.239 - 0.285]    | 0.431 [0.406 - 0.456]         |
| -2.5        | 0.139 [0.118 - 0.163]       | 0.187 [0.176 - 0.198]    | 0.316 [0.299 - 0.334]         |  | 0.232 [0.180 - 0.295]       | 0.261 [0.242 - 0.281]    | 0.427 [0.404 - 0.449]         |
| -2          | 0.140 [0.122 - 0.162]       | 0.189 [0.179 - 0.199]    | 0.314 [0.298 - 0.330]         |  | 0.224 [0.179 - 0.277]       | 0.260 [0.244 - 0.278]    | 0.422 [0.402 - 0.443]         |
| -1.5        | 0.142 [0.125 - 0.161]       | 0.191 [0.182 - 0.200]    | 0.312 [0.298 - 0.326]         |  | 0.217 [0.177 - 0.263]       | 0.260 [0.245 - 0.275]    | 0.418 [0.399 - 0.437]         |
| -1          | 0.143 [0.128 - 0.160]       | 0.192 [0.185 - 0.201]    | 0.310 [0.296 - 0.323]         |  | 0.211 [0.175 - 0.252]       | 0.260 [0.245 - 0.274]    | 0.414 [0.396 - 0.432]         |
| -0.5        | 0.144 [0.130 - 0.160]       | 0.194 [0.187 - 0.202]    | 0.307 [0.294 - 0.321]         |  | 0.206 [0.172 - 0.244]       | 0.259 [0.246 - 0.274]    | 0.410 [0.392 - 0.427]         |
| Mean        | 0.146 [0.132 - 0.161]       | 0.197 [0.189 - 0.204]    | 0.305 [0.292 - 0.319]         |  | 0.201 [0.169 - 0.238]       | 0.260 [0.246 - 0.274]    | 0.405 [0.387 - 0.424]         |
| 0.5         | 0.147 [0.133 - 0.162]       | 0.199 [0.191 - 0.207]    | 0.303 [0.288 - 0.318]         |  | 0.197 [0.165 - 0.234]       | 0.260 [0.246 - 0.275]    | 0.401 [0.382 - 0.421]         |
| 1           | 0.148 [0.134 - 0.164]       | 0.201 [0.193 - 0.209]    | 0.301 [0.285 - 0.318]         |  | 0.194 [0.161 - 0.232]       | 0.261 [0.246 - 0.277]    | 0.397 [0.376 - 0.419]         |
| 1.5         | 0.150 [0.134 - 0.167]       | 0.203 [0.195 - 0.213]    | 0.299 [0.281 - 0.317]         |  | 0.192 [0.158 - 0.231]       | 0.263 [0.247 - 0.280]    | 0.393 [0.370 - 0.417]         |
| 2           | 0.151 [0.134 - 0.170]       | 0.206 [0.196 - 0.216]    | 0.297 [0.277 - 0.317]         |  | 0.190 [0.155 - 0.232]       | 0.266 [0.249 - 0.284]    | 0.389 [0.364 - 0.415]         |
| 2.5         | 0.152 [0.133 - 0.174]       | 0.208 [0.198 - 0.220]    | 0.295 [0.273 - 0.317]         |  | 0.190 [0.152 - 0.235]       | 0.270 [0.251 - 0.289]    | 0.385 [0.357 - 0.414]         |
| 3           | 0.154 [0.132 - 0.178]       | 0.211 [0.199 - 0.224]    | 0.293 [0.269 - 0.318]         |  | 0.190 [0.150 - 0.239]       | 0.274 [0.254 - 0.296]    | 0.381 [0.350 - 0.413]         |
| 3.5         | 0.155 [0.131 - 0.183]       | 0.214 [0.200 - 0.228]    | 0.291 [0.265 - 0.318]         |  | 0.192 [0.148 - 0.246]       | 0.280 [0.258 - 0.304]    | 0.377 [0.344 - 0.412]         |
| 4           | 0.157 [0.130 - 0.187]       | 0.217 [0.201 - 0.233]    | 0.289 [0.260 - 0.319]         |  | 0.195 [0.146 - 0.254]       | 0.287 [0.262 - 0.314]    | 0.374 [0.337 - 0.412]         |
| 4.5         | 0.158 [0.129 - 0.192]       | 0.219 [0.202 - 0.238]    | 0.287 [0.256 - 0.319]         |  | 0.198 [0.144 - 0.265]       | 0.295 [0.266 - 0.325]    | 0.370 [0.330 - 0.411]         |
| 5           | 0.159 [0.127 - 0.198]       | 0.222 [0.203 - 0.243]    | 0.285 [0.252 - 0.320]         |  | 0.202 [0.143 - 0.278]       | 0.302 [0.270 - 0.337]    | 0.366 [0.323 - 0.411]         |

## 1.2

## Preeclampsia

| Age         |                             | <25 yrs                  |                               |  | 25-29 yrs                   |                          |                               |
|-------------|-----------------------------|--------------------------|-------------------------------|--|-----------------------------|--------------------------|-------------------------------|
| Weight gain | Normal weight<br>(n=1,324)  | Underweight<br>(n=698)   | Overweight/Obese<br>(n=314)   |  | Normal weight<br>(n=12,406) | Underweight<br>(n=3,943) | Overweight/Obese<br>(n=3,249) |
| -5          | 0.003 [0.000 - 0.037]       | 0.018 [0.007 - 0.044]    | 0.029 [0.008 - 0.098]         |  | 0.005 [0.002 - 0.013]       | 0.009 [0.006 - 0.014]    | 0.034 [0.017 - 0.068]         |
| -4.5        | 0.003 [0.000 - 0.032]       | 0.018 [0.008 - 0.041]    | 0.030 [0.009 - 0.091]         |  | 0.005 [0.002 - 0.013]       | 0.009 [0.006 - 0.014]    | 0.032 [0.018 - 0.056]         |
| -4          | 0.004 [0.000 - 0.029]       | 0.018 [0.008 - 0.039]    | 0.031 [0.011 - 0.085]         |  | 0.005 [0.002 - 0.012]       | 0.009 [0.006 - 0.013]    | 0.029 [0.018 - 0.047]         |
| -3.5        | 0.004 [0.001 - 0.026]       | 0.018 [0.009 - 0.036]    | 0.032 [0.012 - 0.079]         |  | 0.005 [0.002 - 0.012]       | 0.009 [0.006 - 0.013]    | 0.027 [0.018 - 0.041]         |
| -3          | 0.004 [0.001 - 0.023]       | 0.018 [0.010 - 0.034]    | 0.032 [0.014 - 0.075]         |  | 0.005 [0.003 - 0.011]       | 0.009 [0.007 - 0.013]    | 0.026 [0.018 - 0.036]         |
| -2.5        | 0.004 [0.001 - 0.021]       | 0.019 [0.011 - 0.033]    | 0.033 [0.015 - 0.071]         |  | 0.005 [0.003 - 0.011]       | 0.009 [0.007 - 0.012]    | 0.024 [0.017 - 0.033]         |
| -2          | 0.005 [0.001 - 0.019]       | 0.019 [0.011 - 0.031]    | 0.034 [0.017 - 0.068]         |  | 0.006 [0.003 - 0.010]       | 0.009 [0.007 - 0.012]    | 0.022 [0.017 - 0.030]         |
| -1.5        | 0.005 [0.001 - 0.018]       | 0.019 [0.012 - 0.030]    | 0.035 [0.018 - 0.066]         |  | 0.006 [0.003 - 0.010]       | 0.009 [0.007 - 0.012]    | 0.021 [0.016 - 0.028]         |
| -1          | 0.005 [0.002 - 0.017]       | 0.019 [0.012 - 0.029]    | 0.036 [0.020 - 0.065]         |  | 0.006 [0.004 - 0.010]       | 0.009 [0.008 - 0.011]    | 0.020 [0.015 - 0.027]         |
| -0.5        | 0.005 [0.002 - 0.016]       | 0.019 [0.013 - 0.029]    | 0.037 [0.020 - 0.065]         |  | 0.006 [0.004 - 0.010]       | 0.009 [0.008 - 0.011]    | 0.020 [0.015 - 0.027]         |
| Mean        | 0.006 [0.002 - 0.016]       | 0.019 [0.013 - 0.029]    | 0.038 [0.021 - 0.067]         |  | 0.006 [0.004 - 0.010]       | 0.009 [0.008 - 0.011]    | 0.020 [0.014 - 0.027]         |
| 0.5         | 0.006 [0.002 - 0.016]       | 0.020 [0.013 - 0.029]    | 0.039 [0.021 - 0.071]         |  | 0.007 [0.004 - 0.010]       | 0.009 [0.008 - 0.011]    | 0.020 [0.014 - 0.027]         |
| 1           | 0.007 [0.002 - 0.017]       | 0.020 [0.013 - 0.030]    | 0.040 [0.020 - 0.076]         |  | 0.007 [0.005 - 0.010]       | 0.009 [0.008 - 0.011]    | 0.020 [0.014 - 0.028]         |
| 1.5         | 0.007 [0.002 - 0.020]       | 0.020 [0.012 - 0.032]    | 0.041 [0.019 - 0.083]         |  | 0.007 [0.005 - 0.011]       | 0.009 [0.008 - 0.012]    | 0.021 [0.015 - 0.030]         |
| 2           | 0.007 [0.002 - 0.023]       | 0.020 [0.012 - 0.034]    | 0.042 [0.018 - 0.091]         |  | 0.007 [0.005 - 0.011]       | 0.009 [0.007 - 0.012]    | 0.022 [0.015 - 0.032]         |
| 2.5         | 0.008 [0.002 - 0.027]       | 0.020 [0.011 - 0.036]    | 0.043 [0.017 - 0.101]         |  | 0.007 [0.004 - 0.012]       | 0.009 [0.007 - 0.012]    | 0.024 [0.016 - 0.035]         |
| 3           | 0.008 [0.002 - 0.032]       | 0.020 [0.011 - 0.038]    | 0.044 [0.016 - 0.113]         |  | 0.008 [0.004 - 0.013]       | 0.009 [0.007 - 0.013]    | 0.026 [0.017 - 0.039]         |
| 3.5         | 0.009 [0.002 - 0.040]       | 0.020 [0.010 - 0.041]    | 0.045 [0.015 - 0.126]         |  | 0.008 [0.004 - 0.015]       | 0.009 [0.007 - 0.013]    | 0.029 [0.018 - 0.044]         |
| 4           | 0.009 [0.002 - 0.049]       | 0.021 [0.009 - 0.045]    | 0.046 [0.014 - 0.141]         |  | 0.008 [0.004 - 0.016]       | 0.010 [0.007 - 0.014]    | 0.032 [0.020 - 0.051]         |
| 4.5         | 0.010 [0.002 - 0.061]       | 0.021 [0.009 - 0.048]    | 0.047 [0.013 - 0.158]         |  | 0.008 [0.004 - 0.018]       | 0.010 [0.006 - 0.014]    | 0.036 [0.022 - 0.058]         |
| 5           | 0.011 [0.001 - 0.077]       | 0.021 [0.008 - 0.052]    | 0.048 [0.012 - 0.177]         |  | 0.009 [0.004 - 0.020]       | 0.010 [0.006 - 0.015]    | 0.040 [0.024 - 0.068]         |
| Age         |                             | 30-34 yrs                |                               |  |                             | >34 yrs                  |                               |
| Weight gain | Normal weight<br>(n=12,302) | Underweight<br>(n=2,460) | Overweight/Obese<br>(n=4,749) |  | Normal weight<br>(n=5,750)  | Underweight<br>(n=704)   | Overweight/Obese<br>(n=3,221) |
| -5          | 0.002 [0.000 - 0.005]       | 0.011 [0.006 - 0.020]    | 0.040 [0.025 - 0.062]         |  | 0.010 [0.000 - 0.299]       | 0.016 [0.010 - 0.026]    | 0.053 [0.036 - 0.076]         |
| -4.5        | 0.002 [0.001 - 0.005]       | 0.010 [0.006 - 0.018]    | 0.038 [0.026 - 0.055]         |  | 0.011 [0.001 - 0.192]       | 0.016 [0.010 - 0.025]    | 0.051 [0.037 - 0.071]         |
| -4          | 0.002 [0.001 - 0.006]       | 0.010 [0.006 - 0.016]    | 0.036 [0.026 - 0.049]         |  | 0.013 [0.001 - 0.126]       | 0.016 [0.010 - 0.024]    | 0.050 [0.037 - 0.067]         |
| -3.5        | 0.002 [0.001 - 0.006]       | 0.010 [0.007 - 0.015]    | 0.034 [0.026 - 0.045]         |  | 0.015 [0.002 - 0.088]       | 0.016 [0.011 - 0.023]    | 0.049 [0.038 - 0.063]         |
| -3          | 0.003 [0.001 - 0.006]       | 0.010 [0.007 - 0.014]    | 0.032 [0.026 - 0.041]         |  | 0.016 [0.004 - 0.068]       | 0.016 [0.011 - 0.022]    | 0.047 [0.038 - 0.059]         |
| -2.5        | 0.003 [0.001 - 0.007]       | 0.010 [0.007 - 0.013]    | 0.031 [0.025 - 0.038]         |  | 0.018 [0.006 - 0.057]       | 0.016 [0.012 - 0.022]    | 0.046 [0.038 - 0.057]         |
| -2          | 0.003 [0.001 - 0.007]       | 0.010 [0.008 - 0.013]    | 0.030 [0.024 - 0.036]         |  | 0.020 [0.008 - 0.051]       | 0.016 [0.012 - 0.021]    | 0.045 [0.038 - 0.055]         |
| -1.5        | 0.004 [0.002 - 0.008]       | 0.010 [0.008 - 0.012]    | 0.029 [0.024 - 0.035]         |  | 0.022 [0.010 - 0.050]       | 0.016 [0.012 - 0.020]    | 0.045 [0.037 - 0.053]         |
| -1          | 0.004 [0.002 - 0.008]       | 0.010 [0.008 - 0.012]    | 0.028 [0.023 - 0.034]         |  | 0.024 [0.011 - 0.049]       | 0.016 [0.013 - 0.020]    | 0.044 [0.037 - 0.052]         |
| -0.5        | 0.005 [0.003 - 0.009]       | 0.010 [0.008 - 0.012]    | 0.028 [0.023 - 0.034]         |  | 0.025 [0.012 - 0.049]       | 0.016 [0.013 - 0.020]    | 0.043 [0.036 - 0.052]         |
| Mean        | 0.005 [0.003 - 0.010]       | 0.011 [0.009 - 0.013]    | 0.028 [0.023 - 0.034]         |  | 0.025 [0.012 - 0.050]       | 0.016 [0.013 - 0.019]    | 0.043 [0.035 - 0.051]         |
| 0.5         | 0.006 [0.004 - 0.010]       | 0.011 [0.009 - 0.013]    | 0.028 [0.022 - 0.035]         |  | 0.024 [0.012 - 0.049]       | 0.016 [0.013 - 0.019]    | 0.042 [0.034 - 0.051]         |
| 1           | 0.007 [0.004 - 0.012]       | 0.011 [0.009 - 0.014]    | 0.028 [0.022 - 0.035]         |  | 0.022 [0.010 - 0.048]       | 0.016 [0.013 - 0.020]    | 0.042 [0.034 - 0.052]         |
| 1.5         | 0.008 [0.005 - 0.013]       | 0.012 [0.010 - 0.015]    | 0.029 [0.022 - 0.037]         |  | 0.019 [0.008 - 0.045]       | 0.016 [0.012 - 0.020]    | 0.041 [0.033 - 0.052]         |
| 2           | 0.009 [0.006 - 0.015]       | 0.012 [0.010 - 0.016]    | 0.029 [0.022 - 0.038]         |  | 0.015 [0.005 - 0.041]       | 0.016 [0.012 - 0.021]    | 0.041 [0.032 - 0.053]         |
| 2.5         | 0.010 [0.006 - 0.017]       | 0.013 [0.010 - 0.017]    | 0.029 [0.022 - 0.040]         |  | 0.011 [0.003 - 0.038]       | 0.016 [0.012 - 0.021]    | 0.041 [0.031 - 0.054]         |
| 3           | 0.012 [0.007 - 0.020]       | 0.014 [0.011 - 0.018]    | 0.030 [0.021 - 0.042]         |  | 0.007 [0.001 - 0.037]       | 0.016 [0.011 - 0.022]    | 0.041 [0.029 - 0.056]         |
| 3.5         | 0.013 [0.008 - 0.023]       | 0.015 [0.011 - 0.020]    | 0.030 [0.021 - 0.044]         |  | 0.005 [0.001 - 0.038]       | 0.016 [0.011 - 0.023]    | 0.040 [0.028 - 0.057]         |
| 4           | 0.015 [0.008 - 0.027]       | 0.016 [0.011 - 0.021]    | 0.031 [0.020 - 0.046]         |  | 0.003 [0.000 - 0.043]       | 0.016 [0.011 - 0.023]    | 0.040 [0.027 - 0.059]         |
| 4.5         | 0.017 [0.009 - 0.033]       | 0.016 [0.011 - 0.023]    | 0.031 [0.019 - 0.049]         |  | 0.002 [0.000 - 0.051]       | 0.016 [0.010 - 0.024]    | 0.040 [0.026 - 0.062]         |
| 5           | 0.020 [0.010 - 0.039]       | 0.017 [0.012 - 0.026]    | 0.031 [0.019 - 0.053]         |  | 0.002 [0.000 - 0.067]       | 0.016 [0.010 - 0.025]    | 0.040 [0.025 - 0.064]         |

## 1.3

## Cesarean delivery

| Age         |                             | <25 yrs                  |                               |  | 25-29 yrs                   |                          |                               |
|-------------|-----------------------------|--------------------------|-------------------------------|--|-----------------------------|--------------------------|-------------------------------|
| Weight gain | Normal weight<br>(n=1,324)  | Underweight<br>(n=698)   | Overweight/Obese<br>(n=314)   |  | Normal weight<br>(n=12,406) | Underweight<br>(n=3,943) | Overweight/Obese<br>(n=3,249) |
| -5          | 0.299 [0.191 - 0.436]       | 0.506 [0.406 - 0.606]    | 0.435 [0.291 - 0.591]         |  | 0.384 [0.345 - 0.425]       | 0.431 [0.405 - 0.458]    | 0.526 [0.488 - 0.564]         |
| -4.5        | 0.305 [0.210 - 0.420]       | 0.494 [0.411 - 0.577]    | 0.449 [0.324 - 0.580]         |  | 0.386 [0.350 - 0.424]       | 0.435 [0.412 - 0.459]    | 0.533 [0.498 - 0.568]         |
| -4          | 0.311 [0.228 - 0.408]       | 0.481 [0.412 - 0.550]    | 0.462 [0.355 - 0.574]         |  | 0.388 [0.355 - 0.422]       | 0.439 [0.418 - 0.460]    | 0.539 [0.508 - 0.571]         |
| -3.5        | 0.317 [0.246 - 0.398]       | 0.468 [0.411 - 0.526]    | 0.475 [0.382 - 0.571]         |  | 0.390 [0.359 - 0.421]       | 0.443 [0.425 - 0.461]    | 0.546 [0.517 - 0.575]         |
| -3          | 0.324 [0.263 - 0.392]       | 0.455 [0.407 - 0.505]    | 0.488 [0.405 - 0.571]         |  | 0.392 [0.364 - 0.420]       | 0.447 [0.431 - 0.463]    | 0.553 [0.527 - 0.578]         |
| -2.5        | 0.331 [0.277 - 0.389]       | 0.443 [0.401 - 0.486]    | 0.499 [0.424 - 0.574]         |  | 0.393 [0.369 - 0.419]       | 0.451 [0.437 - 0.465]    | 0.559 [0.536 - 0.582]         |
| -2          | 0.338 [0.290 - 0.390]       | 0.433 [0.395 - 0.472]    | 0.508 [0.438 - 0.579]         |  | 0.395 [0.373 - 0.418]       | 0.455 [0.442 - 0.467]    | 0.566 [0.545 - 0.587]         |
| -1.5        | 0.346 [0.302 - 0.393]       | 0.425 [0.390 - 0.461]    | 0.515 [0.447 - 0.583]         |  | 0.397 [0.377 - 0.417]       | 0.459 [0.448 - 0.470]    | 0.572 [0.553 - 0.591]         |
| -1          | 0.354 [0.312 - 0.400]       | 0.420 [0.386 - 0.454]    | 0.520 [0.452 - 0.587]         |  | 0.399 [0.381 - 0.417]       | 0.463 [0.453 - 0.473]    | 0.579 [0.561 - 0.597]         |
| -0.5        | 0.363 [0.320 - 0.408]       | 0.417 [0.383 - 0.451]    | 0.521 [0.452 - 0.589]         |  | 0.401 [0.384 - 0.417]       | 0.468 [0.458 - 0.477]    | 0.585 [0.568 - 0.603]         |
| Mean        | 0.370 [0.327 - 0.416]       | 0.416 [0.382 - 0.451]    | 0.519 [0.449 - 0.589]         |  | 0.403 [0.387 - 0.418]       | 0.472 [0.463 - 0.482]    | 0.592 [0.574 - 0.609]         |
| 0.5         | 0.377 [0.332 - 0.424]       | 0.416 [0.381 - 0.453]    | 0.515 [0.442 - 0.588]         |  | 0.404 [0.389 - 0.420]       | 0.477 [0.467 - 0.487]    | 0.598 [0.580 - 0.617]         |
| 1           | 0.381 [0.334 - 0.431]       | 0.418 [0.381 - 0.456]    | 0.511 [0.433 - 0.588]         |  | 0.406 [0.390 - 0.423]       | 0.482 [0.472 - 0.492]    | 0.605 [0.585 - 0.625]         |
| 1.5         | 0.384 [0.334 - 0.437]       | 0.421 [0.381 - 0.462]    | 0.506 [0.423 - 0.589]         |  | 0.408 [0.391 - 0.426]       | 0.487 [0.476 - 0.498]    | 0.611 [0.589 - 0.633]         |
| 2           | 0.385 [0.331 - 0.442]       | 0.425 [0.382 - 0.469]    | 0.501 [0.411 - 0.592]         |  | 0.410 [0.390 - 0.430]       | 0.492 [0.480 - 0.504]    | 0.617 [0.593 - 0.641]         |
| 2.5         | 0.384 [0.325 - 0.446]       | 0.431 [0.384 - 0.479]    | 0.497 [0.398 - 0.597]         |  | 0.412 [0.390 - 0.434]       | 0.497 [0.483 - 0.510]    | 0.624 [0.597 - 0.650]         |
| 3           | 0.381 [0.317 - 0.450]       | 0.437 [0.385 - 0.490]    | 0.492 [0.382 - 0.604]         |  | 0.414 [0.389 - 0.439]       | 0.502 [0.487 - 0.517]    | 0.630 [0.600 - 0.659]         |
| 3.5         | 0.376 [0.305 - 0.453]       | 0.444 [0.387 - 0.504]    | 0.487 [0.364 - 0.613]         |  | 0.416 [0.388 - 0.443]       | 0.507 [0.490 - 0.524]    | 0.636 [0.604 - 0.667]         |
| 4           | 0.370 [0.290 - 0.458]       | 0.452 [0.387 - 0.518]    | 0.481 [0.342 - 0.623]         |  | 0.417 [0.387 - 0.448]       | 0.512 [0.493 - 0.531]    | 0.642 [0.607 - 0.676]         |
| 4.5         | 0.363 [0.273 - 0.464]       | 0.459 [0.386 - 0.533]    | 0.474 [0.318 - 0.635]         |  | 0.419 [0.386 - 0.454]       | 0.518 [0.496 - 0.539]    | 0.648 [0.610 - 0.685]         |
| 5           | 0.355 [0.254 - 0.471]       | 0.465 [0.383 - 0.550]    | 0.465 [0.291 - 0.647]         |  | 0.421 [0.384 - 0.459]       | 0.523 [0.499 - 0.546]    | 0.654 [0.613 - 0.694]         |
| Age         |                             | 30-34 yrs                |                               |  |                             | >34 yrs                  |                               |
| Weight gain | Normal weight<br>(n=12,302) | Underweight<br>(n=2,460) | Overweight/Obese<br>(n=5,749) |  | Normal weight<br>(n=5,750)  | Underweight<br>(n=704)   | Overweight/Obese<br>(n=3,221) |
| -5          | 0.488 [0.436 - 0.541]       | 0.558 [0.535 - 0.581]    | 0.654 [0.624 - 0.683]         |  | 0.652 [0.551 - 0.742]       | 0.711 [0.636 - 0.775]    | 0.783 [0.732 - 0.826]         |
| -4.5        | 0.492 [0.444 - 0.540]       | 0.563 [0.542 - 0.584]    | 0.656 [0.629 - 0.683]         |  | 0.660 [0.567 - 0.742]       | 0.710 [0.652 - 0.762]    | 0.785 [0.744 - 0.820]         |
| -4          | 0.495 [0.451 - 0.539]       | 0.568 [0.549 - 0.587]    | 0.658 [0.633 - 0.682]         |  | 0.667 [0.583 - 0.742]       | 0.709 [0.665 - 0.749]    | 0.787 [0.754 - 0.816]         |
| -3.5        | 0.499 [0.459 - 0.539]       | 0.573 [0.555 - 0.590]    | 0.660 [0.638 - 0.682]         |  | 0.675 [0.599 - 0.742]       | 0.709 [0.676 - 0.741]    | 0.789 [0.762 - 0.814]         |
| -3          | 0.502 [0.466 - 0.538]       | 0.577 [0.562 - 0.592]    | 0.662 [0.642 - 0.682]         |  | 0.682 [0.614 - 0.743]       | 0.711 [0.684 - 0.737]    | 0.791 [0.768 - 0.813]         |
| -2.5        | 0.505 [0.473 - 0.538]       | 0.582 [0.568 - 0.595]    | 0.664 [0.646 - 0.682]         |  | 0.689 [0.628 - 0.744]       | 0.715 [0.692 - 0.737]    | 0.794 [0.773 - 0.813]         |
| -2          | 0.509 [0.480 - 0.538]       | 0.587 [0.574 - 0.599]    | 0.666 [0.650 - 0.682]         |  | 0.696 [0.642 - 0.745]       | 0.722 [0.702 - 0.741]    | 0.797 [0.778 - 0.816]         |
| -1.5        | 0.512 [0.486 - 0.538]       | 0.591 [0.580 - 0.602]    | 0.668 [0.654 - 0.683]         |  | 0.703 [0.655 - 0.747]       | 0.731 [0.713 - 0.749]    | 0.802 [0.783 - 0.819]         |
| -1          | 0.516 [0.492 - 0.539]       | 0.596 [0.586 - 0.606]    | 0.670 [0.656 - 0.684]         |  | 0.710 [0.667 - 0.749]       | 0.741 [0.724 - 0.758]    | 0.807 [0.789 - 0.824]         |
| -0.5        | 0.519 [0.498 - 0.540]       | 0.601 [0.591 - 0.610]    | 0.672 [0.658 - 0.686]         |  | 0.717 [0.678 - 0.752]       | 0.752 [0.735 - 0.768]    | 0.812 [0.794 - 0.829]         |
| Mean        | 0.522 [0.502 - 0.543]       | 0.605 [0.596 - 0.614]    | 0.674 [0.660 - 0.688]         |  | 0.723 [0.688 - 0.757]       | 0.761 [0.745 - 0.777]    | 0.818 [0.800 - 0.835]         |
| 0.5         | 0.526 [0.506 - 0.546]       | 0.610 [0.601 - 0.619]    | 0.676 [0.661 - 0.691]         |  | 0.730 [0.695 - 0.762]       | 0.768 [0.751 - 0.784]    | 0.823 [0.804 - 0.841]         |
| 1           | 0.529 [0.508 - 0.550]       | 0.614 [0.605 - 0.624]    | 0.678 [0.661 - 0.695]         |  | 0.736 [0.701 - 0.769]       | 0.773 [0.756 - 0.790]    | 0.828 [0.808 - 0.847]         |
| 1.5         | 0.533 [0.510 - 0.555]       | 0.619 [0.608 - 0.629]    | 0.680 [0.661 - 0.698]         |  | 0.743 [0.705 - 0.777]       | 0.776 [0.757 - 0.793]    | 0.832 [0.810 - 0.851]         |
| 2           | 0.536 [0.511 - 0.561]       | 0.624 [0.612 - 0.635]    | 0.682 [0.661 - 0.702]         |  | 0.749 [0.709 - 0.786]       | 0.777 [0.757 - 0.796]    | 0.835 [0.811 - 0.856]         |
| 2.5         | 0.539 [0.511 - 0.567]       | 0.628 [0.615 - 0.641]    | 0.684 [0.661 - 0.706]         |  | 0.755 [0.711 - 0.795]       | 0.778 [0.757 - 0.799]    | 0.836 [0.811 - 0.859]         |
| 3           | 0.543 [0.511 - 0.574]       | 0.633 [0.618 - 0.647]    | 0.686 [0.661 - 0.710]         |  | 0.761 [0.712 - 0.804]       | 0.780 [0.756 - 0.802]    | 0.837 [0.809 - 0.862]         |
| 3.5         | 0.546 [0.511 - 0.581]       | 0.637 [0.621 - 0.653]    | 0.688 [0.660 - 0.715]         |  | 0.767 [0.714 - 0.814]       | 0.783 [0.756 - 0.807]    | 0.838 [0.805 - 0.865]         |
| 4           | 0.550 [0.510 - 0.588]       | 0.642 [0.624 - 0.659]    | 0.690 [0.659 - 0.719]         |  | 0.773 [0.714 - 0.823]       | 0.787 [0.757 - 0.813]    | 0.837 [0.801 - 0.868]         |
| 4.5         | 0.553 [0.510 - 0.595]       | 0.646 [0.627 - 0.665]    | 0.692 [0.659 - 0.723]         |  | 0.779 [0.715 - 0.832]       | 0.792 [0.760 - 0.821]    | 0.836 [0.795 - 0.871]         |
| 5           | 0.556 [0.509 - 0.603]       | 0.650 [0.629 - 0.671]    | 0.694 [0.658 - 0.727]         |  | 0.785 [0.715 - 0.841]       | 0.800 [0.764 - 0.831]    | 0.835 [0.787 - 0.873]         |

## 1.4

## Preterm delivery

| Age         |                             | <25 yrs                  |                               |                             | 25-29 yrs                |                               |
|-------------|-----------------------------|--------------------------|-------------------------------|-----------------------------|--------------------------|-------------------------------|
| Weight gain | Normal weight<br>(n=1,324)  | Underweight<br>(n=698)   | Overweight/Obese<br>(n=314)   | Normal weight<br>(n=12,406) | Underweight<br>(n=3,943) | Overweight/Obese<br>(n=3,249) |
| -5          | 0.104 [0.055 - 0.187]       | 0.067 [0.041 - 0.107]    | 0.099 [0.045 - 0.205]         | 0.045 [0.029 - 0.067]       | 0.054 [0.040 - 0.074]    | 0.049 [0.036 - 0.067]         |
| -4.5        | 0.100 [0.056 - 0.172]       | 0.066 [0.042 - 0.102]    | 0.098 [0.048 - 0.188]         | 0.044 [0.030 - 0.064]       | 0.052 [0.040 - 0.067]    | 0.050 [0.038 - 0.066]         |
| -4          | 0.096 [0.056 - 0.157]       | 0.066 [0.044 - 0.098]    | 0.097 [0.052 - 0.175]         | 0.043 [0.030 - 0.061]       | 0.050 [0.040 - 0.062]    | 0.051 [0.039 - 0.066]         |
| -3.5        | 0.092 [0.057 - 0.144]       | 0.066 [0.046 - 0.094]    | 0.096 [0.055 - 0.163]         | 0.042 [0.031 - 0.058]       | 0.048 [0.040 - 0.057]    | 0.052 [0.041 - 0.065]         |
| -3          | 0.088 [0.058 - 0.133]       | 0.066 [0.047 - 0.091]    | 0.095 [0.058 - 0.153]         | 0.041 [0.031 - 0.055]       | 0.046 [0.039 - 0.054]    | 0.053 [0.042 - 0.065]         |
| -2.5        | 0.085 [0.058 - 0.122]       | 0.065 [0.049 - 0.088]    | 0.095 [0.060 - 0.145]         | 0.041 [0.031 - 0.052]       | 0.044 [0.038 - 0.050]    | 0.054 [0.044 - 0.065]         |
| -2          | 0.081 [0.058 - 0.113]       | 0.065 [0.050 - 0.085]    | 0.094 [0.062 - 0.140]         | 0.040 [0.032 - 0.050]       | 0.042 [0.038 - 0.048]    | 0.055 [0.046 - 0.065]         |
| -1.5        | 0.078 [0.057 - 0.105]       | 0.065 [0.051 - 0.083]    | 0.094 [0.064 - 0.136]         | 0.039 [0.032 - 0.048]       | 0.041 [0.037 - 0.046]    | 0.055 [0.047 - 0.065]         |
| -1          | 0.075 [0.056 - 0.099]       | 0.065 [0.052 - 0.081]    | 0.094 [0.065 - 0.135]         | 0.039 [0.032 - 0.046]       | 0.040 [0.036 - 0.045]    | 0.056 [0.049 - 0.065]         |
| -0.5        | 0.072 [0.054 - 0.094]       | 0.065 [0.052 - 0.080]    | 0.094 [0.065 - 0.135]         | 0.038 [0.032 - 0.045]       | 0.039 [0.035 - 0.043]    | 0.057 [0.050 - 0.066]         |
| Mean        | 0.069 [0.052 - 0.091]       | 0.064 [0.052 - 0.080]    | 0.095 [0.065 - 0.137]         | 0.037 [0.032 - 0.044]       | 0.038 [0.035 - 0.043]    | 0.058 [0.051 - 0.067]         |
| 0.5         | 0.066 [0.049 - 0.089]       | 0.064 [0.051 - 0.080]    | 0.096 [0.064 - 0.141]         | 0.036 [0.031 - 0.043]       | 0.038 [0.034 - 0.042]    | 0.059 [0.051 - 0.069]         |
| 1           | 0.063 [0.045 - 0.088]       | 0.064 [0.050 - 0.081]    | 0.097 [0.063 - 0.147]         | 0.036 [0.030 - 0.043]       | 0.037 [0.033 - 0.042]    | 0.060 [0.052 - 0.071]         |
| 1.5         | 0.061 [0.042 - 0.088]       | 0.064 [0.049 - 0.083]    | 0.098 [0.061 - 0.154]         | 0.035 [0.029 - 0.043]       | 0.037 [0.033 - 0.042]    | 0.061 [0.052 - 0.073]         |
| 2           | 0.058 [0.038 - 0.088]       | 0.064 [0.047 - 0.085]    | 0.100 [0.059 - 0.163]         | 0.034 [0.028 - 0.043]       | 0.037 [0.032 - 0.042]    | 0.063 [0.052 - 0.075]         |
| 2.5         | 0.056 [0.035 - 0.089]       | 0.063 [0.046 - 0.087]    | 0.101 [0.057 - 0.174]         | 0.034 [0.027 - 0.043]       | 0.036 [0.032 - 0.042]    | 0.064 [0.052 - 0.078]         |
| 3           | 0.054 [0.031 - 0.090]       | 0.063 [0.044 - 0.090]    | 0.103 [0.054 - 0.186]         | 0.033 [0.025 - 0.044]       | 0.036 [0.031 - 0.043]    | 0.065 [0.051 - 0.081]         |
| 3.5         | 0.051 [0.028 - 0.091]       | 0.063 [0.042 - 0.093]    | 0.104 [0.051 - 0.200]         | 0.033 [0.024 - 0.044]       | 0.036 [0.030 - 0.044]    | 0.066 [0.051 - 0.084]         |
| 4           | 0.049 [0.026 - 0.092]       | 0.063 [0.040 - 0.096]    | 0.106 [0.048 - 0.216]         | 0.032 [0.023 - 0.045]       | 0.037 [0.030 - 0.045]    | 0.067 [0.051 - 0.088]         |
| 4.5         | 0.047 [0.023 - 0.093]       | 0.062 [0.039 - 0.099]    | 0.107 [0.045 - 0.233]         | 0.031 [0.022 - 0.045]       | 0.037 [0.029 - 0.046]    | 0.068 [0.050 - 0.091]         |
| 5           | 0.045 [0.021 - 0.095]       | 0.062 [0.037 - 0.103]    | 0.108 [0.042 - 0.252]         | 0.031 [0.021 - 0.046]       | 0.037 [0.029 - 0.048]    | 0.069 [0.050 - 0.095]         |
| Age         |                             | 30-34 yrs                |                               |                             | >34 yrs                  |                               |
| Weight gain | Normal weight<br>(n=12,302) | Underweight<br>(n=2,460) | Overweight/Obese<br>(n=4,749) | Normal weight<br>(n=5,750)  | Underweight<br>(n=704)   | Overweight/Obese<br>(n=3,221) |
| -5          | 0.111 [0.054 - 0.214]       | 0.058 [0.043 - 0.079]    | 0.060 [0.042 - 0.085]         | 0.109 [0.056 - 0.203]       | 0.090 [0.059 - 0.135]    | 0.073 [0.056 - 0.094]         |
| -4.5        | 0.100 [0.055 - 0.174]       | 0.056 [0.044 - 0.073]    | 0.059 [0.044 - 0.079]         | 0.106 [0.058 - 0.188]       | 0.086 [0.061 - 0.120]    | 0.073 [0.058 - 0.092]         |
| -4          | 0.089 [0.055 - 0.142]       | 0.054 [0.044 - 0.067]    | 0.059 [0.046 - 0.075]         | 0.104 [0.060 - 0.174]       | 0.081 [0.061 - 0.107]    | 0.074 [0.059 - 0.091]         |
| -3.5        | 0.081 [0.054 - 0.119]       | 0.053 [0.044 - 0.063]    | 0.058 [0.047 - 0.071]         | 0.101 [0.061 - 0.162]       | 0.077 [0.061 - 0.097]    | 0.074 [0.061 - 0.090]         |
| -3          | 0.073 [0.052 - 0.101]       | 0.051 [0.044 - 0.059]    | 0.058 [0.048 - 0.069]         | 0.098 [0.063 - 0.151]       | 0.073 [0.060 - 0.088]    | 0.075 [0.063 - 0.089]         |
| -2.5        | 0.067 [0.050 - 0.089]       | 0.049 [0.043 - 0.056]    | 0.057 [0.049 - 0.067]         | 0.096 [0.064 - 0.141]       | 0.069 [0.059 - 0.082]    | 0.075 [0.064 - 0.088]         |
| -2          | 0.062 [0.048 - 0.080]       | 0.048 [0.043 - 0.054]    | 0.057 [0.049 - 0.066]         | 0.093 [0.065 - 0.132]       | 0.066 [0.057 - 0.076]    | 0.076 [0.065 - 0.087]         |
| -1.5        | 0.058 [0.046 - 0.073]       | 0.047 [0.042 - 0.052]    | 0.057 [0.049 - 0.066]         | 0.091 [0.066 - 0.124]       | 0.063 [0.055 - 0.072]    | 0.076 [0.067 - 0.087]         |
| -1          | 0.055 [0.044 - 0.068]       | 0.046 [0.042 - 0.051]    | 0.057 [0.049 - 0.065]         | 0.089 [0.066 - 0.118]       | 0.061 [0.053 - 0.069]    | 0.077 [0.068 - 0.087]         |
| -0.5        | 0.052 [0.042 - 0.064]       | 0.045 [0.041 - 0.050]    | 0.056 [0.049 - 0.065]         | 0.086 [0.066 - 0.113]       | 0.059 [0.052 - 0.067]    | 0.077 [0.068 - 0.087]         |
| Mean        | 0.049 [0.039 - 0.061]       | 0.045 [0.041 - 0.049]    | 0.056 [0.048 - 0.065]         | 0.084 [0.065 - 0.109]       | 0.058 [0.050 - 0.066]    | 0.078 [0.068 - 0.088]         |
| 0.5         | 0.046 [0.037 - 0.058]       | 0.044 [0.040 - 0.049]    | 0.055 [0.047 - 0.065]         | 0.082 [0.063 - 0.106]       | 0.057 [0.049 - 0.065]    | 0.078 [0.068 - 0.089]         |
| 1           | 0.044 [0.034 - 0.056]       | 0.044 [0.040 - 0.049]    | 0.055 [0.046 - 0.065]         | 0.080 [0.061 - 0.105]       | 0.057 [0.049 - 0.065]    | 0.079 [0.068 - 0.091]         |
| 1.5         | 0.042 [0.033 - 0.055]       | 0.044 [0.039 - 0.049]    | 0.055 [0.046 - 0.066]         | 0.079 [0.059 - 0.104]       | 0.057 [0.049 - 0.066]    | 0.079 [0.067 - 0.093]         |
| 2           | 0.042 [0.032 - 0.055]       | 0.044 [0.039 - 0.050]    | 0.055 [0.045 - 0.067]         | 0.077 [0.056 - 0.105]       | 0.058 [0.049 - 0.068]    | 0.080 [0.067 - 0.095]         |
| 2.5         | 0.042 [0.031 - 0.057]       | 0.044 [0.039 - 0.050]    | 0.055 [0.045 - 0.069]         | 0.075 [0.053 - 0.106]       | 0.059 [0.050 - 0.071]    | 0.080 [0.066 - 0.098]         |
| 3           | 0.043 [0.030 - 0.059]       | 0.044 [0.038 - 0.051]    | 0.056 [0.044 - 0.071]         | 0.074 [0.050 - 0.108]       | 0.062 [0.051 - 0.074]    | 0.081 [0.065 - 0.100]         |
| 3.5         | 0.044 [0.030 - 0.063]       | 0.045 [0.038 - 0.053]    | 0.058 [0.044 - 0.075]         | 0.073 [0.047 - 0.110]       | 0.064 [0.052 - 0.078]    | 0.081 [0.064 - 0.103]         |
| 4           | 0.045 [0.030 - 0.068]       | 0.045 [0.038 - 0.054]    | 0.059 [0.044 - 0.079]         | 0.071 [0.044 - 0.113]       | 0.067 [0.054 - 0.083]    | 0.082 [0.063 - 0.106]         |
| 4.5         | 0.047 [0.030 - 0.074]       | 0.046 [0.037 - 0.056]    | 0.062 [0.044 - 0.085]         | 0.070 [0.041 - 0.116]       | 0.070 [0.055 - 0.089]    | 0.083 [0.062 - 0.109]         |
| 5           | 0.050 [0.030 - 0.081]       | 0.046 [0.037 - 0.059]    | 0.064 [0.044 - 0.092]         | 0.069 [0.039 - 0.120]       | 0.073 [0.056 - 0.095]    | 0.083 [0.061 - 0.112]         |

## 1.5

## Stillbirth

| Age         |                             | <25 yrs                  |                               |                             | 25-29 yrs                |                               |
|-------------|-----------------------------|--------------------------|-------------------------------|-----------------------------|--------------------------|-------------------------------|
| Weight gain | Normal weight<br>(n=1,324)  | Underweight<br>(n=698)   | Overweight/Obese<br>(n=314)   | Normal weight<br>(n=12,406) | Underweight<br>(n=3,943) | Overweight/Obese<br>(n=3,249) |
| -5          | 0.047 [0.013 - 0.157]       | 0.032 [0.012 - 0.081]    | 0.026 [0.006 - 0.104]         | 0.014 [0.006 - 0.032]       | 0.014 [0.009 - 0.022]    | 0.025 [0.014 - 0.045]         |
| -4.5        | 0.041 [0.013 - 0.124]       | 0.029 [0.012 - 0.068]    | 0.027 [0.007 - 0.093]         | 0.013 [0.006 - 0.029]       | 0.013 [0.009 - 0.020]    | 0.024 [0.014 - 0.040]         |
| -4          | 0.036 [0.013 - 0.098]       | 0.027 [0.012 - 0.057]    | 0.027 [0.008 - 0.084]         | 0.013 [0.006 - 0.026]       | 0.013 [0.009 - 0.018]    | 0.022 [0.014 - 0.036]         |
| -3.5        | 0.032 [0.013 - 0.078]       | 0.025 [0.012 - 0.048]    | 0.027 [0.009 - 0.075]         | 0.012 [0.007 - 0.023]       | 0.012 [0.008 - 0.017]    | 0.021 [0.014 - 0.032]         |
| -3          | 0.028 [0.012 - 0.062]       | 0.022 [0.012 - 0.041]    | 0.027 [0.010 - 0.068]         | 0.012 [0.007 - 0.021]       | 0.011 [0.008 - 0.015]    | 0.020 [0.013 - 0.029]         |
| -2.5        | 0.024 [0.012 - 0.050]       | 0.020 [0.012 - 0.035]    | 0.027 [0.011 - 0.062]         | 0.012 [0.007 - 0.019]       | 0.011 [0.008 - 0.014]    | 0.018 [0.013 - 0.026]         |
| -2          | 0.021 [0.011 - 0.041]       | 0.019 [0.011 - 0.031]    | 0.027 [0.012 - 0.058]         | 0.011 [0.007 - 0.017]       | 0.010 [0.008 - 0.013]    | 0.017 [0.013 - 0.024]         |
| -1.5        | 0.019 [0.010 - 0.034]       | 0.017 [0.011 - 0.027]    | 0.027 [0.013 - 0.055]         | 0.011 [0.007 - 0.016]       | 0.010 [0.008 - 0.012]    | 0.016 [0.012 - 0.022]         |
| -1          | 0.016 [0.009 - 0.030]       | 0.016 [0.010 - 0.024]    | 0.027 [0.013 - 0.053]         | 0.010 [0.007 - 0.015]       | 0.009 [0.007 - 0.011]    | 0.015 [0.011 - 0.020]         |
| -0.5        | 0.014 [0.007 - 0.027]       | 0.014 [0.009 - 0.023]    | 0.027 [0.013 - 0.052]         | 0.010 [0.007 - 0.014]       | 0.009 [0.007 - 0.010]    | 0.014 [0.011 - 0.019]         |
| Mean        | 0.012 [0.006 - 0.026]       | 0.013 [0.008 - 0.022]    | 0.027 [0.013 - 0.054]         | 0.009 [0.007 - 0.013]       | 0.008 [0.007 - 0.010]    | 0.013 [0.010 - 0.018]         |
| 0.5         | 0.011 [0.005 - 0.025]       | 0.012 [0.007 - 0.021]    | 0.027 [0.012 - 0.056]         | 0.009 [0.007 - 0.013]       | 0.008 [0.006 - 0.010]    | 0.012 [0.009 - 0.018]         |
| 1           | 0.010 [0.004 - 0.024]       | 0.011 [0.006 - 0.020]    | 0.027 [0.012 - 0.061]         | 0.009 [0.006 - 0.013]       | 0.007 [0.006 - 0.009]    | 0.012 [0.008 - 0.017]         |
| 1.5         | 0.008 [0.003 - 0.024]       | 0.010 [0.005 - 0.020]    | 0.027 [0.011 - 0.066]         | 0.008 [0.006 - 0.013]       | 0.007 [0.005 - 0.009]    | 0.011 [0.007 - 0.017]         |
| 2           | 0.007 [0.002 - 0.024]       | 0.009 [0.004 - 0.020]    | 0.027 [0.010 - 0.073]         | 0.008 [0.005 - 0.013]       | 0.007 [0.005 - 0.009]    | 0.010 [0.006 - 0.017]         |
| 2.5         | 0.006 [0.002 - 0.024]       | 0.008 [0.003 - 0.020]    | 0.027 [0.009 - 0.081]         | 0.008 [0.005 - 0.013]       | 0.006 [0.004 - 0.009]    | 0.010 [0.006 - 0.017]         |
| 3           | 0.006 [0.001 - 0.024]       | 0.007 [0.003 - 0.020]    | 0.027 [0.008 - 0.090]         | 0.008 [0.004 - 0.013]       | 0.006 [0.004 - 0.009]    | 0.009 [0.005 - 0.017]         |
| 3.5         | 0.005 [0.001 - 0.024]       | 0.007 [0.002 - 0.020]    | 0.027 [0.007 - 0.101]         | 0.007 [0.004 - 0.014]       | 0.006 [0.004 - 0.008]    | 0.008 [0.004 - 0.017]         |
| 4           | 0.004 [0.001 - 0.024]       | 0.006 [0.002 - 0.020]    | 0.027 [0.006 - 0.113]         | 0.007 [0.003 - 0.014]       | 0.005 [0.003 - 0.008]    | 0.008 [0.004 - 0.016]         |
| 4.5         | 0.004 [0.001 - 0.025]       | 0.006 [0.002 - 0.020]    | 0.027 [0.005 - 0.127]         | 0.007 [0.003 - 0.015]       | 0.005 [0.003 - 0.008]    | 0.007 [0.003 - 0.016]         |
| 5           | 0.003 [0.000 - 0.025]       | 0.005 [0.001 - 0.021]    | 0.027 [0.005 - 0.143]         | 0.006 [0.003 - 0.015]       | 0.005 [0.003 - 0.008]    | 0.007 [0.003 - 0.016]         |
| Age         |                             | 30-34 yrs                |                               |                             | >34 yrs                  |                               |
| Weight gain | Normal weight<br>(n=12,302) | Underweight<br>(n=2,460) | Overweight/Obese<br>(n=4,749) | Normal weight<br>(n=5,750)  | Underweight<br>(n=704)   | Overweight/Obese<br>(n=3,221) |
| -5          | 0.010 [0.003 - 0.032]       | 0.016 [0.007 - 0.033]    | 0.013 [0.007 - 0.022]         | 0.001 [0.000 - 0.012]       | 0.022 [0.011 - 0.045]    | 0.019 [0.011 - 0.033]         |
| -4.5        | 0.009 [0.003 - 0.028]       | 0.014 [0.008 - 0.026]    | 0.012 [0.007 - 0.021]         | 0.001 [0.000 - 0.012]       | 0.021 [0.011 - 0.038]    | 0.019 [0.011 - 0.031]         |
| -4          | 0.009 [0.003 - 0.025]       | 0.013 [0.008 - 0.021]    | 0.012 [0.008 - 0.020]         | 0.002 [0.000 - 0.012]       | 0.019 [0.011 - 0.032]    | 0.019 [0.012 - 0.029]         |
| -3.5        | 0.009 [0.004 - 0.022]       | 0.011 [0.008 - 0.018]    | 0.012 [0.008 - 0.019]         | 0.002 [0.000 - 0.013]       | 0.018 [0.011 - 0.028]    | 0.018 [0.012 - 0.028]         |
| -3          | 0.009 [0.004 - 0.019]       | 0.010 [0.007 - 0.015]    | 0.012 [0.008 - 0.018]         | 0.002 [0.000 - 0.013]       | 0.017 [0.011 - 0.025]    | 0.018 [0.012 - 0.026]         |
| -2.5        | 0.008 [0.004 - 0.017]       | 0.009 [0.007 - 0.013]    | 0.012 [0.009 - 0.017]         | 0.002 [0.000 - 0.013]       | 0.016 [0.011 - 0.022]    | 0.018 [0.013 - 0.025]         |
| -2          | 0.008 [0.004 - 0.015]       | 0.009 [0.006 - 0.011]    | 0.012 [0.009 - 0.016]         | 0.003 [0.001 - 0.013]       | 0.014 [0.011 - 0.020]    | 0.018 [0.013 - 0.024]         |
| -1.5        | 0.008 [0.004 - 0.014]       | 0.008 [0.006 - 0.010]    | 0.012 [0.009 - 0.016]         | 0.003 [0.001 - 0.014]       | 0.014 [0.010 - 0.018]    | 0.017 [0.013 - 0.023]         |
| -1          | 0.008 [0.004 - 0.013]       | 0.007 [0.006 - 0.009]    | 0.012 [0.009 - 0.016]         | 0.004 [0.001 - 0.014]       | 0.013 [0.010 - 0.017]    | 0.017 [0.013 - 0.022]         |
| -0.5        | 0.007 [0.005 - 0.012]       | 0.007 [0.005 - 0.009]    | 0.012 [0.009 - 0.016]         | 0.004 [0.001 - 0.015]       | 0.012 [0.009 - 0.016]    | 0.017 [0.013 - 0.022]         |
| Mean        | 0.007 [0.004 - 0.011]       | 0.006 [0.005 - 0.008]    | 0.012 [0.009 - 0.016]         | 0.005 [0.002 - 0.015]       | 0.012 [0.009 - 0.015]    | 0.017 [0.012 - 0.022]         |
| 0.5         | 0.007 [0.004 - 0.011]       | 0.006 [0.005 - 0.008]    | 0.012 [0.009 - 0.016]         | 0.006 [0.002 - 0.016]       | 0.011 [0.008 - 0.015]    | 0.016 [0.012 - 0.022]         |
| 1           | 0.007 [0.004 - 0.011]       | 0.006 [0.004 - 0.008]    | 0.012 [0.008 - 0.016]         | 0.006 [0.002 - 0.017]       | 0.011 [0.008 - 0.014]    | 0.016 [0.011 - 0.023]         |
| 1.5         | 0.007 [0.004 - 0.012]       | 0.006 [0.004 - 0.008]    | 0.012 [0.008 - 0.017]         | 0.007 [0.003 - 0.019]       | 0.010 [0.008 - 0.014]    | 0.016 [0.011 - 0.023]         |
| 2           | 0.006 [0.003 - 0.012]       | 0.006 [0.004 - 0.008]    | 0.012 [0.008 - 0.017]         | 0.008 [0.003 - 0.020]       | 0.010 [0.007 - 0.014]    | 0.016 [0.010 - 0.024]         |
| 2.5         | 0.006 [0.003 - 0.013]       | 0.006 [0.004 - 0.009]    | 0.012 [0.007 - 0.018]         | 0.010 [0.004 - 0.023]       | 0.010 [0.007 - 0.015]    | 0.015 [0.010 - 0.025]         |
| 3           | 0.006 [0.003 - 0.013]       | 0.007 [0.005 - 0.010]    | 0.012 [0.007 - 0.019]         | 0.011 [0.005 - 0.026]       | 0.010 [0.006 - 0.015]    | 0.015 [0.009 - 0.025]         |
| 3.5         | 0.006 [0.002 - 0.014]       | 0.007 [0.005 - 0.011]    | 0.011 [0.007 - 0.020]         | 0.013 [0.005 - 0.031]       | 0.009 [0.006 - 0.015]    | 0.015 [0.009 - 0.026]         |
| 4           | 0.006 [0.002 - 0.015]       | 0.008 [0.005 - 0.012]    | 0.011 [0.006 - 0.021]         | 0.014 [0.006 - 0.037]       | 0.009 [0.005 - 0.016]    | 0.015 [0.008 - 0.027]         |
| 4.5         | 0.005 [0.002 - 0.016]       | 0.008 [0.005 - 0.014]    | 0.011 [0.006 - 0.022]         | 0.017 [0.006 - 0.044]       | 0.009 [0.005 - 0.016]    | 0.015 [0.007 - 0.028]         |
| 5           | 0.005 [0.002 - 0.018]       | 0.009 [0.005 - 0.016]    | 0.011 [0.006 - 0.023]         | 0.019 [0.006 - 0.054]       | 0.009 [0.004 - 0.017]    | 0.014 [0.007 - 0.030]         |

## 1.6

## Macrosomia

| Age         |                             | <25 yrs                  |                               |                             | 25-29 yrs                |                               |
|-------------|-----------------------------|--------------------------|-------------------------------|-----------------------------|--------------------------|-------------------------------|
| Weight gain | Normal weight<br>(n=1,317)  | Underweight<br>(n=697)   | Overweight/Obese<br>(n=313)   | Normal weight<br>(n=12,390) | Underweight<br>(n=3,940) | Overweight/Obese<br>(n=3,236) |
| -5          | 0.006 [0.001 - 0.034]       | 0.017 [0.005 - 0.052]    | 0.083 [0.028 - 0.222]         | 0.001 [0.000 - 0.008]       | 0.032 [0.017 - 0.058]    | 0.043 [0.032 - 0.057]         |
| -4.5        | 0.006 [0.001 - 0.032]       | 0.018 [0.007 - 0.049]    | 0.080 [0.032 - 0.186]         | 0.001 [0.000 - 0.008]       | 0.030 [0.018 - 0.047]    | 0.045 [0.034 - 0.059]         |
| -4          | 0.007 [0.001 - 0.030]       | 0.020 [0.009 - 0.046]    | 0.076 [0.035 - 0.160]         | 0.002 [0.000 - 0.008]       | 0.028 [0.019 - 0.040]    | 0.048 [0.037 - 0.061]         |
| -3.5        | 0.007 [0.002 - 0.028]       | 0.022 [0.011 - 0.045]    | 0.073 [0.037 - 0.140]         | 0.002 [0.001 - 0.008]       | 0.026 [0.019 - 0.035]    | 0.050 [0.040 - 0.063]         |
| -3          | 0.008 [0.002 - 0.027]       | 0.025 [0.014 - 0.044]    | 0.070 [0.038 - 0.125]         | 0.003 [0.001 - 0.008]       | 0.025 [0.019 - 0.032]    | 0.053 [0.043 - 0.065]         |
| -2.5        | 0.008 [0.003 - 0.026]       | 0.027 [0.016 - 0.044]    | 0.068 [0.039 - 0.115]         | 0.004 [0.002 - 0.009]       | 0.024 [0.020 - 0.030]    | 0.056 [0.046 - 0.067]         |
| -2          | 0.009 [0.003 - 0.024]       | 0.029 [0.019 - 0.045]    | 0.066 [0.039 - 0.109]         | 0.005 [0.003 - 0.010]       | 0.025 [0.021 - 0.030]    | 0.059 [0.050 - 0.070]         |
| -1.5        | 0.009 [0.004 - 0.024]       | 0.032 [0.022 - 0.047]    | 0.065 [0.039 - 0.105]         | 0.007 [0.004 - 0.012]       | 0.026 [0.022 - 0.031]    | 0.062 [0.053 - 0.072]         |
| -1          | 0.010 [0.004 - 0.023]       | 0.034 [0.024 - 0.049]    | 0.065 [0.040 - 0.105]         | 0.009 [0.006 - 0.014]       | 0.029 [0.024 - 0.033]    | 0.066 [0.057 - 0.075]         |
| -0.5        | 0.011 [0.005 - 0.023]       | 0.037 [0.026 - 0.052]    | 0.066 [0.041 - 0.107]         | 0.011 [0.008 - 0.016]       | 0.031 [0.027 - 0.036]    | 0.069 [0.061 - 0.079]         |
| Mean        | 0.011 [0.006 - 0.023]       | 0.039 [0.028 - 0.055]    | 0.069 [0.042 - 0.112]         | 0.014 [0.010 - 0.019]       | 0.035 [0.030 - 0.040]    | 0.073 [0.064 - 0.083]         |
| 0.5         | 0.012 [0.006 - 0.024]       | 0.042 [0.030 - 0.059]    | 0.074 [0.045 - 0.120]         | 0.016 [0.012 - 0.023]       | 0.038 [0.033 - 0.043]    | 0.077 [0.068 - 0.087]         |
| 1           | 0.013 [0.007 - 0.026]       | 0.044 [0.031 - 0.062]    | 0.080 [0.048 - 0.132]         | 0.019 [0.014 - 0.026]       | 0.040 [0.035 - 0.046]    | 0.081 [0.071 - 0.092]         |
| 1.5         | 0.014 [0.007 - 0.029]       | 0.046 [0.032 - 0.066]    | 0.088 [0.051 - 0.147]         | 0.022 [0.016 - 0.030]       | 0.042 [0.036 - 0.049]    | 0.085 [0.074 - 0.098]         |
| 2           | 0.015 [0.007 - 0.033]       | 0.048 [0.033 - 0.071]    | 0.098 [0.056 - 0.165]         | 0.024 [0.017 - 0.033]       | 0.044 [0.038 - 0.052]    | 0.090 [0.077 - 0.104]         |
| 2.5         | 0.016 [0.007 - 0.038]       | 0.050 [0.033 - 0.076]    | 0.108 [0.060 - 0.188]         | 0.027 [0.019 - 0.037]       | 0.047 [0.039 - 0.055]    | 0.095 [0.080 - 0.111]         |
| 3           | 0.017 [0.007 - 0.044]       | 0.051 [0.032 - 0.080]    | 0.120 [0.064 - 0.215]         | 0.029 [0.020 - 0.042]       | 0.050 [0.042 - 0.060]    | 0.099 [0.083 - 0.119]         |
| 3.5         | 0.018 [0.006 - 0.052]       | 0.051 [0.030 - 0.085]    | 0.133 [0.066 - 0.247]         | 0.031 [0.021 - 0.046]       | 0.055 [0.046 - 0.067]    | 0.105 [0.086 - 0.127]         |
| 4           | 0.020 [0.006 - 0.061]       | 0.051 [0.028 - 0.090]    | 0.146 [0.068 - 0.284]         | 0.034 [0.022 - 0.051]       | 0.062 [0.050 - 0.077]    | 0.110 [0.089 - 0.136]         |
| 4.5         | 0.021 [0.006 - 0.073]       | 0.050 [0.026 - 0.096]    | 0.159 [0.069 - 0.326]         | 0.036 [0.023 - 0.057]       | 0.070 [0.056 - 0.088]    | 0.116 [0.092 - 0.145]         |
| 5           | 0.022 [0.005 - 0.087]       | 0.049 [0.023 - 0.101]    | 0.173 [0.068 - 0.374]         | 0.038 [0.023 - 0.064]       | 0.080 [0.062 - 0.102]    | 0.122 [0.094 - 0.156]         |
| Age         |                             | 30-34 yrs                |                               |                             | >34 yrs                  |                               |
| Weight gain | Normal weight<br>(n=12,281) | Underweight<br>(n=2,458) | Overweight/Obese<br>(n=4,738) | Normal weight<br>(n=5,735)  | Underweight<br>(n=703)   | Overweight/Obese<br>(n=3,211) |
| -5          | 0.004 [0.001 - 0.011]       | 0.014 [0.009 - 0.021]    | 0.039 [0.027 - 0.058]         | 0.000 [0.000 - 0.008]       | 0.014 [0.010 - 0.019]    | 0.036 [0.027 - 0.049]         |
| -4.5        | 0.004 [0.002 - 0.011]       | 0.016 [0.011 - 0.022]    | 0.042 [0.030 - 0.058]         | 0.000 [0.000 - 0.008]       | 0.015 [0.011 - 0.021]    | 0.039 [0.029 - 0.051]         |
| -4          | 0.005 [0.002 - 0.012]       | 0.017 [0.013 - 0.023]    | 0.045 [0.034 - 0.058]         | 0.000 [0.000 - 0.008]       | 0.016 [0.012 - 0.022]    | 0.041 [0.032 - 0.053]         |
| -3.5        | 0.006 [0.003 - 0.012]       | 0.019 [0.015 - 0.025]    | 0.047 [0.038 - 0.060]         | 0.000 [0.000 - 0.008]       | 0.018 [0.013 - 0.023]    | 0.043 [0.034 - 0.055]         |
| -3          | 0.006 [0.003 - 0.013]       | 0.021 [0.017 - 0.026]    | 0.051 [0.042 - 0.061]         | 0.000 [0.000 - 0.008]       | 0.019 [0.015 - 0.025]    | 0.046 [0.037 - 0.057]         |
| -2.5        | 0.007 [0.004 - 0.014]       | 0.024 [0.020 - 0.028]    | 0.054 [0.046 - 0.064]         | 0.001 [0.000 - 0.008]       | 0.021 [0.016 - 0.026]    | 0.049 [0.040 - 0.059]         |
| -2          | 0.008 [0.005 - 0.015]       | 0.026 [0.022 - 0.030]    | 0.058 [0.050 - 0.068]         | 0.001 [0.000 - 0.008]       | 0.023 [0.018 - 0.028]    | 0.052 [0.043 - 0.061]         |
| -1.5        | 0.010 [0.006 - 0.016]       | 0.029 [0.025 - 0.033]    | 0.063 [0.055 - 0.072]         | 0.001 [0.000 - 0.009]       | 0.024 [0.020 - 0.030]    | 0.055 [0.046 - 0.064]         |
| -1          | 0.011 [0.007 - 0.017]       | 0.031 [0.028 - 0.035]    | 0.067 [0.059 - 0.077]         | 0.001 [0.000 - 0.010]       | 0.027 [0.022 - 0.032]    | 0.058 [0.050 - 0.067]         |
| -0.5        | 0.012 [0.008 - 0.018]       | 0.034 [0.031 - 0.038]    | 0.072 [0.063 - 0.082]         | 0.002 [0.000 - 0.010]       | 0.029 [0.025 - 0.034]    | 0.061 [0.053 - 0.070]         |
| Mean        | 0.014 [0.010 - 0.020]       | 0.037 [0.034 - 0.042]    | 0.076 [0.067 - 0.087]         | 0.003 [0.001 - 0.012]       | 0.031 [0.027 - 0.037]    | 0.065 [0.056 - 0.074]         |
| 0.5         | 0.016 [0.011 - 0.022]       | 0.041 [0.037 - 0.045]    | 0.080 [0.070 - 0.092]         | 0.003 [0.001 - 0.013]       | 0.034 [0.030 - 0.039]    | 0.069 [0.060 - 0.079]         |
| 1           | 0.018 [0.013 - 0.025]       | 0.044 [0.040 - 0.049]    | 0.084 [0.073 - 0.097]         | 0.004 [0.001 - 0.016]       | 0.037 [0.032 - 0.043]    | 0.073 [0.063 - 0.084]         |
| 1.5         | 0.020 [0.015 - 0.028]       | 0.047 [0.043 - 0.053]    | 0.087 [0.075 - 0.101]         | 0.006 [0.002 - 0.019]       | 0.040 [0.035 - 0.046]    | 0.077 [0.066 - 0.090]         |
| 2           | 0.023 [0.017 - 0.032]       | 0.051 [0.045 - 0.057]    | 0.090 [0.077 - 0.106]         | 0.008 [0.003 - 0.023]       | 0.044 [0.038 - 0.050]    | 0.081 [0.068 - 0.096]         |
| 2.5         | 0.026 [0.019 - 0.036]       | 0.055 [0.048 - 0.062]    | 0.093 [0.078 - 0.111]         | 0.010 [0.004 - 0.028]       | 0.047 [0.041 - 0.055]    | 0.086 [0.071 - 0.103]         |
| 3           | 0.029 [0.020 - 0.041]       | 0.059 [0.051 - 0.067]    | 0.096 [0.079 - 0.116]         | 0.013 [0.005 - 0.035]       | 0.051 [0.043 - 0.060]    | 0.091 [0.074 - 0.111]         |
| 3.5         | 0.033 [0.022 - 0.048]       | 0.062 [0.054 - 0.072]    | 0.098 [0.079 - 0.121]         | 0.017 [0.007 - 0.043]       | 0.056 [0.046 - 0.066]    | 0.096 [0.077 - 0.119]         |
| 4           | 0.036 [0.024 - 0.055]       | 0.066 [0.057 - 0.077]    | 0.100 [0.079 - 0.126]         | 0.021 [0.008 - 0.053]       | 0.060 [0.049 - 0.073]    | 0.101 [0.079 - 0.128]         |
| 4.5         | 0.040 [0.026 - 0.063]       | 0.070 [0.059 - 0.083]    | 0.102 [0.078 - 0.132]         | 0.027 [0.010 - 0.066]       | 0.065 [0.053 - 0.081]    | 0.107 [0.082 - 0.138]         |
| 5           | 0.045 [0.027 - 0.073]       | 0.074 [0.061 - 0.090]    | 0.104 [0.076 - 0.139]         | 0.033 [0.013 - 0.082]       | 0.071 [0.056 - 0.089]    | 0.113 [0.085 - 0.149]         |



## 1.7

## Small for gestational age

| Age         |                             | <25 yrs                  |                               |                             | 25-29 yrs                |                               |
|-------------|-----------------------------|--------------------------|-------------------------------|-----------------------------|--------------------------|-------------------------------|
| Weight gain | Normal weight<br>(n=1,316)  | Underweight<br>(n=697)   | Overweight/Obese<br>(n=313)   | Normal weight<br>(n=12,386) | Underweight<br>(n=3,938) | Overweight/Obese<br>(n=3,236) |
| -5          | 0.153 [0.083 - 0.266]       | 0.067 [0.037 - 0.120]    | 0.056 [0.017 - 0.167]         | 0.061 [0.031 - 0.116]       | 0.080 [0.064 - 0.098]    | 0.032 [0.019 - 0.052]         |
| -4.5        | 0.140 [0.080 - 0.233]       | 0.063 [0.036 - 0.107]    | 0.052 [0.018 - 0.143]         | 0.061 [0.035 - 0.105]       | 0.073 [0.060 - 0.088]    | 0.031 [0.019 - 0.048]         |
| -4          | 0.127 [0.077 - 0.204]       | 0.059 [0.036 - 0.096]    | 0.049 [0.019 - 0.122]         | 0.062 [0.040 - 0.096]       | 0.067 [0.056 - 0.079]    | 0.029 [0.019 - 0.044]         |
| -3.5        | 0.116 [0.074 - 0.178]       | 0.055 [0.035 - 0.086]    | 0.046 [0.020 - 0.105]         | 0.063 [0.044 - 0.089]       | 0.061 [0.052 - 0.071]    | 0.028 [0.019 - 0.040]         |
| -3          | 0.105 [0.070 - 0.155]       | 0.052 [0.035 - 0.077]    | 0.043 [0.020 - 0.091]         | 0.064 [0.047 - 0.084]       | 0.056 [0.048 - 0.064]    | 0.026 [0.019 - 0.037]         |
| -2.5        | 0.096 [0.067 - 0.135]       | 0.049 [0.034 - 0.069]    | 0.041 [0.020 - 0.080]         | 0.064 [0.051 - 0.081]       | 0.051 [0.045 - 0.058]    | 0.025 [0.019 - 0.034]         |
| -2          | 0.087 [0.063 - 0.119]       | 0.046 [0.033 - 0.063]    | 0.038 [0.020 - 0.071]         | 0.064 [0.053 - 0.079]       | 0.046 [0.041 - 0.052]    | 0.024 [0.018 - 0.031]         |
| -1.5        | 0.079 [0.058 - 0.105]       | 0.043 [0.032 - 0.057]    | 0.036 [0.019 - 0.065]         | 0.064 [0.053 - 0.076]       | 0.042 [0.038 - 0.047]    | 0.023 [0.018 - 0.029]         |
| -1          | 0.071 [0.053 - 0.095]       | 0.040 [0.030 - 0.053]    | 0.033 [0.018 - 0.061]         | 0.062 [0.052 - 0.073]       | 0.039 [0.035 - 0.042]    | 0.022 [0.017 - 0.028]         |
| -0.5        | 0.064 [0.048 - 0.086]       | 0.037 [0.028 - 0.050]    | 0.031 [0.016 - 0.060]         | 0.059 [0.050 - 0.070]       | 0.035 [0.032 - 0.039]    | 0.021 [0.016 - 0.027]         |
| Mean        | 0.058 [0.042 - 0.080]       | 0.035 [0.026 - 0.047]    | 0.029 [0.014 - 0.059]         | 0.056 [0.047 - 0.066]       | 0.032 [0.029 - 0.036]    | 0.020 [0.015 - 0.026]         |
| 0.5         | 0.052 [0.037 - 0.075]       | 0.033 [0.023 - 0.045]    | 0.028 [0.012 - 0.060]         | 0.052 [0.044 - 0.062]       | 0.029 [0.026 - 0.033]    | 0.019 [0.014 - 0.025]         |
| 1           | 0.047 [0.031 - 0.071]       | 0.031 [0.021 - 0.044]    | 0.026 [0.010 - 0.062]         | 0.049 [0.040 - 0.059]       | 0.027 [0.024 - 0.030]    | 0.018 [0.013 - 0.025]         |
| 1.5         | 0.043 [0.027 - 0.067]       | 0.029 [0.019 - 0.043]    | 0.024 [0.009 - 0.064]         | 0.045 [0.037 - 0.056]       | 0.024 [0.021 - 0.028]    | 0.017 [0.012 - 0.024]         |
| 2           | 0.039 [0.023 - 0.065]       | 0.027 [0.017 - 0.042]    | 0.023 [0.007 - 0.067]         | 0.042 [0.034 - 0.053]       | 0.022 [0.019 - 0.026]    | 0.016 [0.011 - 0.024]         |
| 2.5         | 0.035 [0.019 - 0.062]       | 0.025 [0.015 - 0.042]    | 0.021 [0.006 - 0.071]         | 0.040 [0.031 - 0.051]       | 0.020 [0.017 - 0.024]    | 0.016 [0.010 - 0.024]         |
| 3           | 0.031 [0.016 - 0.060]       | 0.023 [0.013 - 0.041]    | 0.020 [0.005 - 0.075]         | 0.038 [0.028 - 0.050]       | 0.018 [0.015 - 0.022]    | 0.015 [0.009 - 0.024]         |
| 3.5         | 0.028 [0.014 - 0.057]       | 0.022 [0.011 - 0.041]    | 0.019 [0.004 - 0.079]         | 0.036 [0.026 - 0.050]       | 0.017 [0.013 - 0.021]    | 0.014 [0.008 - 0.024]         |
| 4           | 0.025 [0.011 - 0.055]       | 0.020 [0.010 - 0.041]    | 0.017 [0.003 - 0.083]         | 0.035 [0.024 - 0.050]       | 0.015 [0.012 - 0.019]    | 0.014 [0.008 - 0.024]         |
| 4.5         | 0.023 [0.010 - 0.053]       | 0.019 [0.009 - 0.040]    | 0.016 [0.003 - 0.089]         | 0.033 [0.022 - 0.051]       | 0.014 [0.011 - 0.018]    | 0.013 [0.007 - 0.024]         |
| 5           | 0.021 [0.008 - 0.052]       | 0.018 [0.008 - 0.040]    | 0.015 [0.002 - 0.094]         | 0.032 [0.019 - 0.053]       | 0.013 [0.009 - 0.017]    | 0.012 [0.006 - 0.024]         |
| Age         |                             | 30-34 yrs                |                               |                             | >34 yrs                  |                               |
| Weight gain | Normal weight<br>(n=12,275) | Underweight<br>(n=2,458) | Overweight/Obese<br>(n=4,735) | Normal weight<br>(n=5,730)  | Underweight<br>(n=703)   | Overweight/Obese<br>(n=3,208) |
| -5          | 0.119 [0.080 - 0.174]       | 0.080 [0.058 - 0.110]    | 0.048 [0.033 - 0.069]         | 0.190 [0.095 - 0.344]       | 0.054 [0.037 - 0.078]    | 0.042 [0.023 - 0.076]         |
| -4.5        | 0.111 [0.077 - 0.157]       | 0.072 [0.054 - 0.094]    | 0.043 [0.031 - 0.060]         | 0.170 [0.090 - 0.297]       | 0.050 [0.036 - 0.070]    | 0.037 [0.022 - 0.060]         |
| -4          | 0.103 [0.074 - 0.142]       | 0.064 [0.051 - 0.080]    | 0.039 [0.029 - 0.053]         | 0.151 [0.084 - 0.254]       | 0.046 [0.034 - 0.062]    | 0.032 [0.021 - 0.048]         |
| -3.5        | 0.096 [0.071 - 0.128]       | 0.058 [0.048 - 0.069]    | 0.036 [0.027 - 0.046]         | 0.133 [0.079 - 0.216]       | 0.043 [0.033 - 0.056]    | 0.028 [0.019 - 0.040]         |
| -3          | 0.089 [0.068 - 0.115]       | 0.052 [0.044 - 0.061]    | 0.032 [0.025 - 0.041]         | 0.118 [0.074 - 0.183]       | 0.040 [0.031 - 0.050]    | 0.025 [0.018 - 0.034]         |
| -2.5        | 0.083 [0.065 - 0.104]       | 0.047 [0.041 - 0.054]    | 0.029 [0.024 - 0.036]         | 0.104 [0.068 - 0.155]       | 0.037 [0.029 - 0.045]    | 0.022 [0.016 - 0.030]         |
| -2          | 0.077 [0.062 - 0.094]       | 0.042 [0.037 - 0.048]    | 0.026 [0.022 - 0.032]         | 0.091 [0.063 - 0.131]       | 0.034 [0.028 - 0.041]    | 0.020 [0.014 - 0.027]         |
| -1.5        | 0.071 [0.059 - 0.085]       | 0.038 [0.034 - 0.043]    | 0.024 [0.020 - 0.029]         | 0.080 [0.057 - 0.112]       | 0.031 [0.026 - 0.037]    | 0.018 [0.013 - 0.024]         |
| -1          | 0.066 [0.055 - 0.078]       | 0.035 [0.031 - 0.039]    | 0.022 [0.018 - 0.026]         | 0.070 [0.051 - 0.096]       | 0.029 [0.024 - 0.034]    | 0.017 [0.012 - 0.023]         |
| -0.5        | 0.061 [0.052 - 0.072]       | 0.032 [0.028 - 0.036]    | 0.019 [0.016 - 0.024]         | 0.062 [0.045 - 0.084]       | 0.027 [0.023 - 0.031]    | 0.016 [0.011 - 0.022]         |
| Mean        | 0.056 [0.048 - 0.066]       | 0.029 [0.026 - 0.033]    | 0.018 [0.014 - 0.022]         | 0.054 [0.039 - 0.075]       | 0.025 [0.021 - 0.029]    | 0.015 [0.011 - 0.021]         |
| 0.5         | 0.052 [0.044 - 0.062]       | 0.027 [0.024 - 0.031]    | 0.016 [0.012 - 0.021]         | 0.047 [0.033 - 0.068]       | 0.023 [0.019 - 0.027]    | 0.015 [0.010 - 0.021]         |
| 1           | 0.048 [0.040 - 0.059]       | 0.025 [0.022 - 0.029]    | 0.014 [0.011 - 0.020]         | 0.041 [0.027 - 0.062]       | 0.021 [0.017 - 0.026]    | 0.014 [0.010 - 0.021]         |
| 1.5         | 0.045 [0.036 - 0.056]       | 0.023 [0.020 - 0.027]    | 0.013 [0.009 - 0.018]         | 0.036 [0.022 - 0.057]       | 0.019 [0.015 - 0.024]    | 0.014 [0.009 - 0.022]         |
| 2           | 0.041 [0.032 - 0.053]       | 0.022 [0.019 - 0.026]    | 0.012 [0.008 - 0.017]         | 0.031 [0.018 - 0.053]       | 0.018 [0.014 - 0.023]    | 0.014 [0.009 - 0.022]         |
| 2.5         | 0.038 [0.028 - 0.051]       | 0.021 [0.017 - 0.026]    | 0.011 [0.007 - 0.016]         | 0.027 [0.015 - 0.050]       | 0.016 [0.012 - 0.022]    | 0.014 [0.008 - 0.023]         |
| 3           | 0.035 [0.025 - 0.049]       | 0.020 [0.016 - 0.025]    | 0.010 [0.006 - 0.015]         | 0.024 [0.012 - 0.046]       | 0.015 [0.011 - 0.021]    | 0.014 [0.008 - 0.024]         |
| 3.5         | 0.033 [0.023 - 0.047]       | 0.019 [0.015 - 0.025]    | 0.009 [0.005 - 0.015]         | 0.021 [0.010 - 0.044]       | 0.014 [0.010 - 0.020]    | 0.013 [0.007 - 0.026]         |
| 4           | 0.030 [0.020 - 0.045]       | 0.018 [0.014 - 0.025]    | 0.008 [0.004 - 0.014]         | 0.018 [0.008 - 0.041]       | 0.013 [0.009 - 0.019]    | 0.013 [0.006 - 0.028]         |
| 4.5         | 0.028 [0.018 - 0.043]       | 0.018 [0.012 - 0.025]    | 0.007 [0.004 - 0.013]         | 0.016 [0.006 - 0.038]       | 0.012 [0.008 - 0.018]    | 0.013 [0.006 - 0.030]         |
| 5           | 0.026 [0.016 - 0.041]       | 0.017 [0.011 - 0.025]    | 0.006 [0.003 - 0.012]         | 0.014 [0.005 - 0.036]       | 0.011 [0.007 - 0.018]    | 0.013 [0.005 - 0.034]         |

## 1.8

## Large for gestational age

| Age         |                             | <25 yrs                  |                               |  | 25-29 yrs                   |                          |                               |
|-------------|-----------------------------|--------------------------|-------------------------------|--|-----------------------------|--------------------------|-------------------------------|
| Weight gain | Normal weight<br>(n=1,316)  | Underweight<br>(n=697)   | Overweight/Obese<br>(n=313)   |  | Normal weight<br>(n=12,386) | Underweight<br>(n=3,938) | Overweight/Obese<br>(n=3,236) |
| -5          | 0.038 [0.019 - 0.076]       | 0.084 [0.058 - 0.120]    | 0.153 [0.089 - 0.250]         |  | 0.032 [0.019 - 0.053]       | 0.064 [0.056 - 0.073]    | 0.132 [0.111 - 0.156]         |
| -4.5        | 0.041 [0.022 - 0.077]       | 0.088 [0.063 - 0.122]    | 0.157 [0.096 - 0.246]         |  | 0.035 [0.022 - 0.054]       | 0.068 [0.060 - 0.077]    | 0.138 [0.118 - 0.161]         |
| -4          | 0.044 [0.024 - 0.079]       | 0.091 [0.067 - 0.123]    | 0.161 [0.103 - 0.242]         |  | 0.038 [0.026 - 0.056]       | 0.073 [0.065 - 0.081]    | 0.145 [0.126 - 0.166]         |
| -3.5        | 0.047 [0.028 - 0.080]       | 0.095 [0.072 - 0.125]    | 0.165 [0.111 - 0.239]         |  | 0.042 [0.030 - 0.058]       | 0.078 [0.070 - 0.086]    | 0.152 [0.133 - 0.172]         |
| -3          | 0.051 [0.031 - 0.082]       | 0.099 [0.077 - 0.127]    | 0.169 [0.118 - 0.236]         |  | 0.045 [0.034 - 0.060]       | 0.083 [0.075 - 0.091]    | 0.159 [0.142 - 0.178]         |
| -2.5        | 0.054 [0.035 - 0.084]       | 0.103 [0.082 - 0.129]    | 0.173 [0.126 - 0.234]         |  | 0.049 [0.039 - 0.062]       | 0.088 [0.081 - 0.096]    | 0.166 [0.150 - 0.184]         |
| -2          | 0.058 [0.039 - 0.086]       | 0.108 [0.088 - 0.131]    | 0.178 [0.133 - 0.233]         |  | 0.054 [0.044 - 0.066]       | 0.094 [0.087 - 0.101]    | 0.174 [0.159 - 0.191]         |
| -1.5        | 0.062 [0.044 - 0.088]       | 0.112 [0.093 - 0.134]    | 0.182 [0.140 - 0.234]         |  | 0.059 [0.050 - 0.070]       | 0.100 [0.093 - 0.106]    | 0.182 [0.168 - 0.198]         |
| -1          | 0.067 [0.048 - 0.091]       | 0.116 [0.098 - 0.137]    | 0.187 [0.146 - 0.236]         |  | 0.064 [0.055 - 0.074]       | 0.106 [0.100 - 0.112]    | 0.191 [0.177 - 0.206]         |
| -0.5        | 0.071 [0.053 - 0.095]       | 0.121 [0.104 - 0.141]    | 0.191 [0.150 - 0.240]         |  | 0.069 [0.061 - 0.079]       | 0.113 [0.107 - 0.119]    | 0.199 [0.185 - 0.214]         |
| Mean        | 0.076 [0.058 - 0.100]       | 0.126 [0.109 - 0.146]    | 0.196 [0.154 - 0.246]         |  | 0.075 [0.066 - 0.085]       | 0.120 [0.114 - 0.126]    | 0.208 [0.194 - 0.223]         |
| 0.5         | 0.082 [0.063 - 0.106]       | 0.131 [0.113 - 0.152]    | 0.201 [0.155 - 0.255]         |  | 0.081 [0.071 - 0.092]       | 0.127 [0.121 - 0.133]    | 0.217 [0.203 - 0.233]         |
| 1           | 0.087 [0.067 - 0.113]       | 0.136 [0.117 - 0.158]    | 0.205 [0.156 - 0.266]         |  | 0.087 [0.076 - 0.098]       | 0.135 [0.129 - 0.141]    | 0.227 [0.211 - 0.244]         |
| 1.5         | 0.093 [0.071 - 0.122]       | 0.142 [0.120 - 0.166]    | 0.210 [0.155 - 0.278]         |  | 0.092 [0.081 - 0.105]       | 0.143 [0.136 - 0.150]    | 0.237 [0.219 - 0.256]         |
| 2           | 0.100 [0.074 - 0.133]       | 0.147 [0.123 - 0.175]    | 0.215 [0.154 - 0.292]         |  | 0.098 [0.086 - 0.112]       | 0.152 [0.144 - 0.160]    | 0.247 [0.227 - 0.268]         |
| 2.5         | 0.107 [0.077 - 0.146]       | 0.153 [0.126 - 0.185]    | 0.220 [0.152 - 0.308]         |  | 0.104 [0.090 - 0.120]       | 0.161 [0.151 - 0.170]    | 0.257 [0.234 - 0.282]         |
| 3           | 0.114 [0.079 - 0.161]       | 0.159 [0.128 - 0.196]    | 0.226 [0.150 - 0.324]         |  | 0.109 [0.093 - 0.127]       | 0.170 [0.159 - 0.182]    | 0.268 [0.242 - 0.296]         |
| 3.5         | 0.121 [0.081 - 0.177]       | 0.165 [0.130 - 0.207]    | 0.231 [0.148 - 0.342]         |  | 0.115 [0.097 - 0.136]       | 0.180 [0.168 - 0.193]    | 0.279 [0.250 - 0.310]         |
| 4           | 0.129 [0.083 - 0.195]       | 0.171 [0.132 - 0.220]    | 0.236 [0.145 - 0.361]         |  | 0.121 [0.100 - 0.145]       | 0.190 [0.176 - 0.206]    | 0.290 [0.257 - 0.325]         |
| 4.5         | 0.138 [0.085 - 0.215]       | 0.178 [0.134 - 0.232]    | 0.242 [0.142 - 0.380]         |  | 0.127 [0.103 - 0.155]       | 0.201 [0.185 - 0.219]    | 0.302 [0.265 - 0.341]         |
| 5           | 0.147 [0.087 - 0.237]       | 0.185 [0.136 - 0.246]    | 0.247 [0.139 - 0.400]         |  | 0.133 [0.105 - 0.166]       | 0.212 [0.194 - 0.233]    | 0.313 [0.273 - 0.357]         |
| Age         |                             | 30-34 yrs                |                               |  |                             | >34 yrs                  |                               |
| Weight gain | Normal weight<br>(n=12,275) | Underweight<br>(n=2,458) | Overweight/Obese<br>(n=4,735) |  | Normal weight<br>(n=5,730)  | Underweight<br>(n=703)   | Overweight/Obese<br>(n=3,208) |
| -5          | 0.057 [0.035 - 0.093]       | 0.061 [0.048 - 0.078]    | 0.151 [0.132 - 0.172]         |  | 0.038 [0.020 - 0.072]       | 0.093 [0.079 - 0.110]    | 0.192 [0.166 - 0.221]         |
| -4.5        | 0.059 [0.038 - 0.091]       | 0.067 [0.054 - 0.082]    | 0.157 [0.139 - 0.177]         |  | 0.041 [0.023 - 0.074]       | 0.098 [0.084 - 0.114]    | 0.197 [0.173 - 0.224]         |
| -4          | 0.061 [0.042 - 0.089]       | 0.073 [0.061 - 0.086]    | 0.163 [0.146 - 0.182]         |  | 0.045 [0.026 - 0.077]       | 0.103 [0.090 - 0.118]    | 0.202 [0.179 - 0.226]         |
| -3.5        | 0.063 [0.045 - 0.088]       | 0.079 [0.068 - 0.091]    | 0.170 [0.154 - 0.187]         |  | 0.049 [0.029 - 0.080]       | 0.108 [0.096 - 0.123]    | 0.207 [0.186 - 0.229]         |
| -3          | 0.065 [0.049 - 0.087]       | 0.086 [0.076 - 0.096]    | 0.177 [0.162 - 0.193]         |  | 0.053 [0.033 - 0.083]       | 0.114 [0.102 - 0.128]    | 0.212 [0.192 - 0.232]         |
| -2.5        | 0.068 [0.053 - 0.087]       | 0.093 [0.085 - 0.102]    | 0.184 [0.170 - 0.199]         |  | 0.057 [0.037 - 0.087]       | 0.120 [0.108 - 0.133]    | 0.217 [0.199 - 0.236]         |
| -2          | 0.070 [0.057 - 0.087]       | 0.101 [0.093 - 0.109]    | 0.191 [0.178 - 0.205]         |  | 0.062 [0.042 - 0.091]       | 0.126 [0.115 - 0.138]    | 0.222 [0.205 - 0.239]         |
| -1.5        | 0.073 [0.061 - 0.088]       | 0.109 [0.101 - 0.116]    | 0.199 [0.187 - 0.212]         |  | 0.067 [0.047 - 0.094]       | 0.132 [0.121 - 0.143]    | 0.227 [0.211 - 0.243]         |
| -1          | 0.076 [0.065 - 0.090]       | 0.117 [0.110 - 0.124]    | 0.207 [0.195 - 0.219]         |  | 0.072 [0.052 - 0.099]       | 0.138 [0.129 - 0.149]    | 0.232 [0.217 - 0.248]         |
| -0.5        | 0.080 [0.068 - 0.093]       | 0.125 [0.118 - 0.132]    | 0.215 [0.203 - 0.227]         |  | 0.078 [0.058 - 0.104]       | 0.145 [0.136 - 0.155]    | 0.238 [0.223 - 0.253]         |
| Mean        | 0.084 [0.072 - 0.096]       | 0.133 [0.125 - 0.140]    | 0.223 [0.211 - 0.236]         |  | 0.084 [0.064 - 0.109]       | 0.152 [0.143 - 0.162]    | 0.243 [0.228 - 0.259]         |
| 0.5         | 0.088 [0.076 - 0.101]       | 0.140 [0.133 - 0.149]    | 0.231 [0.218 - 0.245]         |  | 0.091 [0.071 - 0.116]       | 0.160 [0.150 - 0.170]    | 0.249 [0.233 - 0.266]         |
| 1           | 0.092 [0.080 - 0.106]       | 0.148 [0.140 - 0.157]    | 0.240 [0.225 - 0.255]         |  | 0.098 [0.077 - 0.123]       | 0.167 [0.157 - 0.178]    | 0.255 [0.237 - 0.273]         |
| 1.5         | 0.098 [0.084 - 0.113]       | 0.155 [0.146 - 0.165]    | 0.249 [0.233 - 0.266]         |  | 0.105 [0.084 - 0.132]       | 0.175 [0.164 - 0.187]    | 0.260 [0.240 - 0.281]         |
| 2           | 0.103 [0.088 - 0.120]       | 0.163 [0.152 - 0.173]    | 0.258 [0.239 - 0.277]         |  | 0.114 [0.090 - 0.143]       | 0.183 [0.171 - 0.196]    | 0.266 [0.244 - 0.290]         |
| 2.5         | 0.109 [0.092 - 0.129]       | 0.170 [0.159 - 0.182]    | 0.267 [0.246 - 0.289]         |  | 0.122 [0.096 - 0.155]       | 0.192 [0.178 - 0.206]    | 0.272 [0.247 - 0.299]         |
| 3           | 0.116 [0.096 - 0.138]       | 0.178 [0.165 - 0.191]    | 0.277 [0.253 - 0.302]         |  | 0.132 [0.101 - 0.169]       | 0.201 [0.185 - 0.217]    | 0.278 [0.250 - 0.308]         |
| 3.5         | 0.123 [0.101 - 0.149]       | 0.185 [0.170 - 0.201]    | 0.286 [0.260 - 0.315]         |  | 0.141 [0.106 - 0.186]       | 0.210 [0.192 - 0.229]    | 0.284 [0.253 - 0.318]         |
| 4           | 0.130 [0.105 - 0.161]       | 0.193 [0.176 - 0.211]    | 0.296 [0.267 - 0.328]         |  | 0.152 [0.111 - 0.203]       | 0.219 [0.199 - 0.241]    | 0.290 [0.256 - 0.328]         |
| 4.5         | 0.138 [0.109 - 0.174]       | 0.200 [0.181 - 0.221]    | 0.307 [0.273 - 0.342]         |  | 0.163 [0.116 - 0.223]       | 0.229 [0.206 - 0.254]    | 0.297 [0.259 - 0.338]         |
| 5           | 0.147 [0.113 - 0.189]       | 0.208 [0.185 - 0.232]    | 0.317 [0.280 - 0.356]         |  | 0.175 [0.121 - 0.245]       | 0.239 [0.213 - 0.267]    | 0.303 [0.262 - 0.348]         |

## 1.9

## All disease

| Age         |                             | <25 yrs                  |                               |  | 25-29 yrs                   |                          |                               |
|-------------|-----------------------------|--------------------------|-------------------------------|--|-----------------------------|--------------------------|-------------------------------|
| Weight gain | Normal weight<br>(n=1,324)  | Underweight<br>(n=698)   | Overweight/Obese<br>(n=314)   |  | Normal weight<br>(n=12,406) | Underweight<br>(n=3,943) | Overweight/Obese<br>(n=3,249) |
| -5          | 0.268 [0.177 - 0.384]       | 0.249 [0.200 - 0.305]    | 0.473 [0.324 - 0.628]         |  | 0.217 [0.186 - 0.251]       | 0.319 [0.270 - 0.372]    | 0.429 [0.379 - 0.481]         |
| -4.5        | 0.264 [0.184 - 0.364]       | 0.253 [0.207 - 0.305]    | 0.466 [0.339 - 0.597]         |  | 0.219 [0.191 - 0.252]       | 0.307 [0.270 - 0.347]    | 0.433 [0.390 - 0.477]         |
| -4          | 0.260 [0.190 - 0.345]       | 0.257 [0.214 - 0.305]    | 0.459 [0.351 - 0.570]         |  | 0.223 [0.196 - 0.252]       | 0.297 [0.269 - 0.326]    | 0.436 [0.400 - 0.474]         |
| -3.5        | 0.257 [0.196 - 0.329]       | 0.261 [0.222 - 0.305]    | 0.451 [0.359 - 0.547]         |  | 0.226 [0.201 - 0.253]       | 0.287 [0.266 - 0.310]    | 0.440 [0.409 - 0.472]         |
| -3          | 0.253 [0.200 - 0.314]       | 0.265 [0.229 - 0.305]    | 0.445 [0.364 - 0.529]         |  | 0.229 [0.206 - 0.253]       | 0.280 [0.262 - 0.299]    | 0.444 [0.416 - 0.471]         |
| -2.5        | 0.249 [0.203 - 0.302]       | 0.269 [0.236 - 0.305]    | 0.439 [0.366 - 0.515]         |  | 0.232 [0.211 - 0.254]       | 0.275 [0.260 - 0.291]    | 0.447 [0.423 - 0.471]         |
| -2          | 0.246 [0.205 - 0.292]       | 0.274 [0.243 - 0.306]    | 0.435 [0.367 - 0.506]         |  | 0.235 [0.216 - 0.255]       | 0.274 [0.260 - 0.288]    | 0.451 [0.429 - 0.473]         |
| -1.5        | 0.243 [0.205 - 0.284]       | 0.278 [0.250 - 0.308]    | 0.433 [0.366 - 0.501]         |  | 0.238 [0.221 - 0.256]       | 0.275 [0.262 - 0.288]    | 0.454 [0.434 - 0.475]         |
| -1          | 0.240 [0.205 - 0.279]       | 0.282 [0.256 - 0.310]    | 0.432 [0.367 - 0.500]         |  | 0.241 [0.226 - 0.257]       | 0.278 [0.266 - 0.290]    | 0.458 [0.438 - 0.478]         |
| -0.5        | 0.239 [0.205 - 0.276]       | 0.287 [0.262 - 0.313]    | 0.434 [0.368 - 0.503]         |  | 0.244 [0.230 - 0.259]       | 0.283 [0.271 - 0.295]    | 0.462 [0.442 - 0.482]         |
| Mean        | 0.238 [0.204 - 0.275]       | 0.291 [0.266 - 0.317]    | 0.439 [0.370 - 0.510]         |  | 0.248 [0.234 - 0.262]       | 0.289 [0.277 - 0.301]    | 0.466 [0.446 - 0.487]         |
| 0.5         | 0.238 [0.203 - 0.276]       | 0.296 [0.270 - 0.322]    | 0.446 [0.375 - 0.520]         |  | 0.251 [0.237 - 0.265]       | 0.296 [0.283 - 0.308]    | 0.471 [0.450 - 0.493]         |
| 1           | 0.238 [0.202 - 0.279]       | 0.300 [0.273 - 0.329]    | 0.457 [0.380 - 0.535]         |  | 0.254 [0.240 - 0.269]       | 0.303 [0.290 - 0.316]    | 0.477 [0.454 - 0.500]         |
| 1.5         | 0.239 [0.200 - 0.283]       | 0.305 [0.274 - 0.337]    | 0.469 [0.386 - 0.553]         |  | 0.258 [0.242 - 0.274]       | 0.311 [0.297 - 0.326]    | 0.483 [0.458 - 0.508]         |
| 2           | 0.241 [0.198 - 0.289]       | 0.309 [0.276 - 0.345]    | 0.482 [0.392 - 0.574]         |  | 0.261 [0.244 - 0.279]       | 0.320 [0.305 - 0.336]    | 0.489 [0.462 - 0.516]         |
| 2.5         | 0.243 [0.196 - 0.296]       | 0.314 [0.276 - 0.354]    | 0.497 [0.397 - 0.598]         |  | 0.264 [0.245 - 0.284]       | 0.329 [0.312 - 0.347]    | 0.495 [0.466 - 0.525]         |
| 3           | 0.245 [0.193 - 0.305]       | 0.318 [0.277 - 0.363]    | 0.513 [0.401 - 0.624]         |  | 0.268 [0.246 - 0.291]       | 0.339 [0.320 - 0.359]    | 0.502 [0.470 - 0.535]         |
| 3.5         | 0.247 [0.190 - 0.315]       | 0.323 [0.277 - 0.373]    | 0.530 [0.403 - 0.653]         |  | 0.271 [0.247 - 0.297]       | 0.349 [0.328 - 0.372]    | 0.510 [0.474 - 0.546]         |
| 4           | 0.249 [0.185 - 0.327]       | 0.328 [0.277 - 0.383]    | 0.547 [0.402 - 0.685]         |  | 0.275 [0.248 - 0.304]       | 0.360 [0.335 - 0.386]    | 0.518 [0.478 - 0.558]         |
| 4.5         | 0.252 [0.180 - 0.341]       | 0.333 [0.277 - 0.394]    | 0.565 [0.399 - 0.717]         |  | 0.278 [0.248 - 0.310]       | 0.371 [0.343 - 0.401]    | 0.527 [0.482 - 0.572]         |
| 5           | 0.255 [0.174 - 0.356]       | 0.337 [0.276 - 0.404]    | 0.583 [0.395 - 0.749]         |  | 0.282 [0.249 - 0.317]       | 0.382 [0.350 - 0.415]    | 0.537 [0.486 - 0.586]         |
| Age         |                             | 30-34 yrs                |                               |  |                             | >34 yrs                  |                               |
| Weight gain | Normal weight<br>(n=12,302) | Underweight<br>(n=2,460) | Overweight/Obese<br>(n=5,749) |  | Normal weight<br>(n=5,750)  | Underweight<br>(n=704)   | Overweight/Obese<br>(n=3,221) |
| -5          | 0.374 [0.281 - 0.478]       | 0.333 [0.298 - 0.371]    | 0.492 [0.456 - 0.528]         |  | 0.529 [0.348 - 0.703]       | 0.457 [0.383 - 0.533]    | 0.641 [0.586 - 0.691]         |
| -4.5        | 0.364 [0.286 - 0.450]       | 0.334 [0.304 - 0.366]    | 0.493 [0.462 - 0.525]         |  | 0.509 [0.357 - 0.659]       | 0.450 [0.392 - 0.510]    | 0.633 [0.588 - 0.675]         |
| -4          | 0.354 [0.291 - 0.423]       | 0.336 [0.311 - 0.361]    | 0.494 [0.467 - 0.522]         |  | 0.489 [0.363 - 0.616]       | 0.443 [0.398 - 0.489]    | 0.625 [0.588 - 0.660]         |
| -3.5        | 0.345 [0.293 - 0.400]       | 0.337 [0.316 - 0.358]    | 0.496 [0.472 - 0.520]         |  | 0.469 [0.366 - 0.575]       | 0.437 [0.402 - 0.472]    | 0.618 [0.587 - 0.648]         |
| -3          | 0.335 [0.293 - 0.380]       | 0.338 [0.321 - 0.356]    | 0.497 [0.476 - 0.518]         |  | 0.450 [0.365 - 0.537]       | 0.430 [0.402 - 0.459]    | 0.611 [0.584 - 0.637]         |
| -2.5        | 0.327 [0.292 - 0.364]       | 0.340 [0.326 - 0.355]    | 0.499 [0.480 - 0.518]         |  | 0.431 [0.361 - 0.503]       | 0.424 [0.400 - 0.448]    | 0.605 [0.581 - 0.629]         |
| -2          | 0.319 [0.290 - 0.350]       | 0.342 [0.330 - 0.355]    | 0.500 [0.483 - 0.518]         |  | 0.414 [0.355 - 0.475]       | 0.419 [0.398 - 0.441]    | 0.601 [0.578 - 0.623]         |
| -1.5        | 0.312 [0.286 - 0.339]       | 0.345 [0.333 - 0.356]    | 0.502 [0.486 - 0.518]         |  | 0.399 [0.347 - 0.453]       | 0.416 [0.397 - 0.436]    | 0.597 [0.575 - 0.619]         |
| -1          | 0.306 [0.282 - 0.331]       | 0.348 [0.337 - 0.359]    | 0.504 [0.489 - 0.520]         |  | 0.386 [0.339 - 0.436]       | 0.415 [0.397 - 0.435]    | 0.595 [0.573 - 0.616]         |
| -0.5        | 0.302 [0.279 - 0.325]       | 0.351 [0.341 - 0.362]    | 0.506 [0.490 - 0.522]         |  | 0.376 [0.331 - 0.423]       | 0.416 [0.398 - 0.435]    | 0.593 [0.571 - 0.615]         |
| Mean        | 0.299 [0.277 - 0.322]       | 0.355 [0.345 - 0.366]    | 0.508 [0.492 - 0.524]         |  | 0.369 [0.325 - 0.415]       | 0.419 [0.400 - 0.438]    | 0.593 [0.570 - 0.615]         |
| 0.5         | 0.298 [0.276 - 0.322]       | 0.360 [0.349 - 0.371]    | 0.510 [0.493 - 0.528]         |  | 0.364 [0.320 - 0.411]       | 0.422 [0.403 - 0.442]    | 0.593 [0.569 - 0.617]         |
| 1           | 0.300 [0.276 - 0.325]       | 0.365 [0.353 - 0.376]    | 0.513 [0.494 - 0.531]         |  | 0.362 [0.316 - 0.410]       | 0.427 [0.407 - 0.447]    | 0.595 [0.570 - 0.621]         |
| 1.5         | 0.303 [0.278 - 0.329]       | 0.370 [0.358 - 0.383]    | 0.515 [0.495 - 0.536]         |  | 0.362 [0.314 - 0.412]       | 0.434 [0.412 - 0.455]    | 0.599 [0.571 - 0.626]         |
| 2           | 0.307 [0.280 - 0.336]       | 0.377 [0.363 - 0.390]    | 0.518 [0.496 - 0.540]         |  | 0.363 [0.313 - 0.417]       | 0.443 [0.420 - 0.466]    | 0.602 [0.572 - 0.632]         |
| 2.5         | 0.312 [0.282 - 0.344]       | 0.384 [0.369 - 0.399]    | 0.521 [0.496 - 0.546]         |  | 0.367 [0.313 - 0.425]       | 0.455 [0.430 - 0.481]    | 0.607 [0.574 - 0.639]         |
| 3           | 0.317 [0.284 - 0.352]       | 0.392 [0.375 - 0.408]    | 0.524 [0.496 - 0.551]         |  | 0.373 [0.315 - 0.435]       | 0.471 [0.443 - 0.499]    | 0.612 [0.575 - 0.648]         |
| 3.5         | 0.323 [0.286 - 0.363]       | 0.400 [0.381 - 0.419]    | 0.527 [0.496 - 0.557]         |  | 0.381 [0.317 - 0.449]       | 0.489 [0.458 - 0.520]    | 0.618 [0.577 - 0.657]         |
| 4           | 0.330 [0.288 - 0.374]       | 0.408 [0.387 - 0.430]    | 0.530 [0.496 - 0.564]         |  | 0.390 [0.320 - 0.465]       | 0.508 [0.474 - 0.543]    | 0.623 [0.577 - 0.667]         |
| 4.5         | 0.337 [0.290 - 0.389]       | 0.417 [0.393 - 0.442]    | 0.533 [0.495 - 0.571]         |  | 0.400 [0.322 - 0.484]       | 0.527 [0.490 - 0.565]    | 0.629 [0.577 - 0.679]         |
| 5           | 0.347 [0.292 - 0.405]       | 0.427 [0.399 - 0.455]    | 0.537 [0.495 - 0.578]         |  | 0.412 [0.324 - 0.505]       | 0.545 [0.503 - 0.586]    | 0.636 [0.577 - 0.691]         |

## 2. Evaluation of weight gain between 24 and 34 weeks after pregnancy

- Generalized additive model (GAM) was used for predictive model of each disease.
- The above statistical model was applied to subsets of each age and BMI (ASIA).
- Reference weight gain = 5kg (Mean weight gain of mothers without any disease).

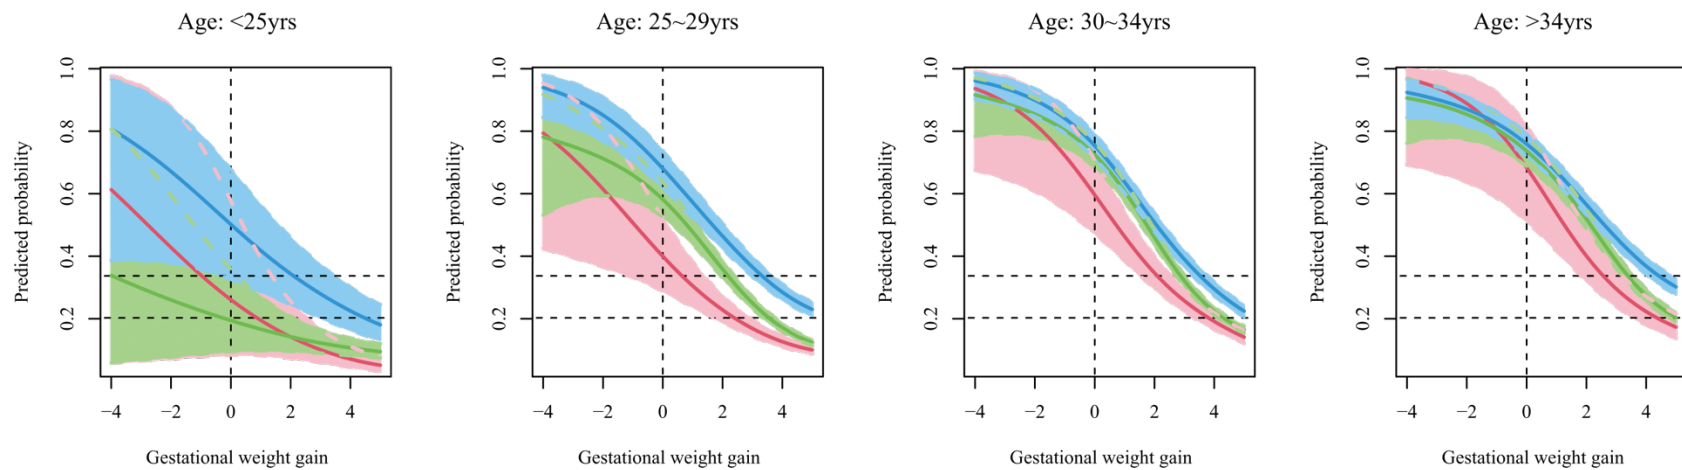

(a) **Gestational diabetes mellitus** (Red: Normal weight, Green: Underweight, Blue: Overweight/obese)

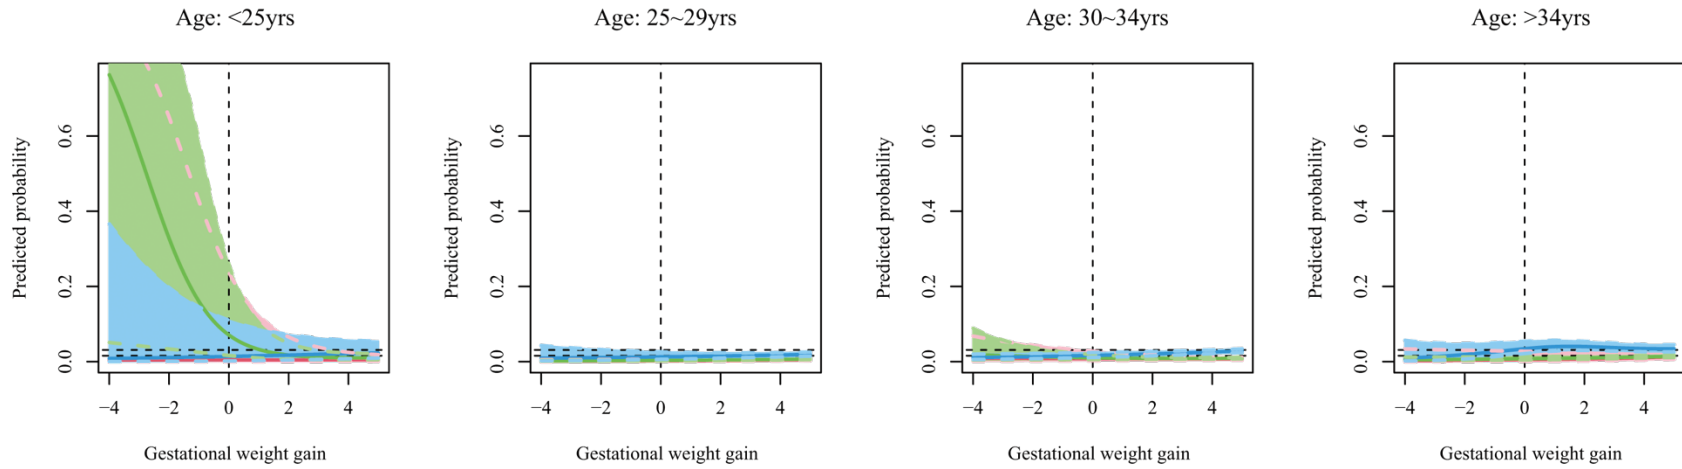

(b) **Preeclampsia** (Red: Normal weight, Green: Underweight, Blue: Overweight/obese)

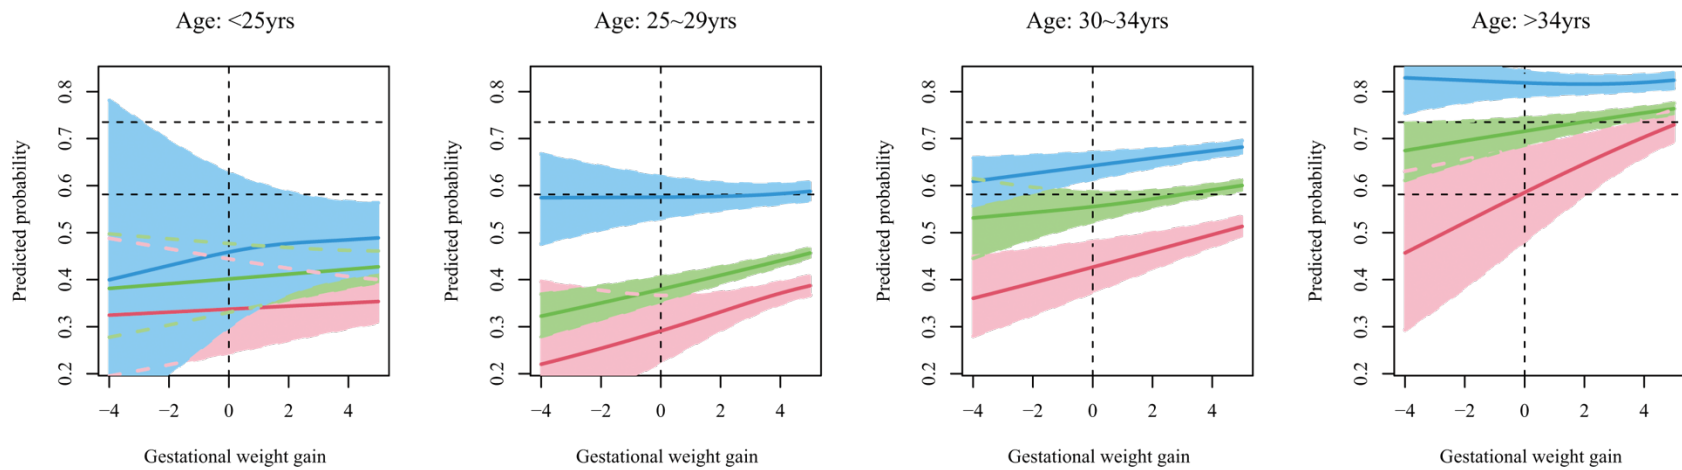

(c) **Cesarean delivery** (Red: Normal weight, Green: Underweight, Blue: Overweight/obese)

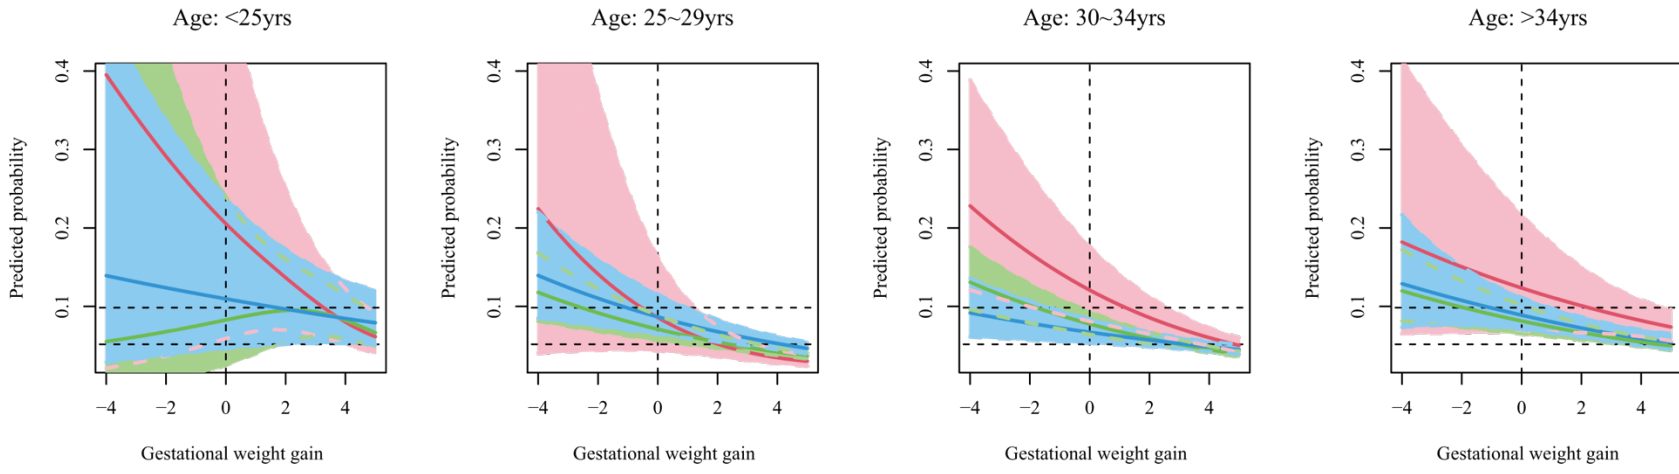

(d) **Preterm delivery** (Red: Normal weight, Green: Underweight, Blue: Overweight/obese)

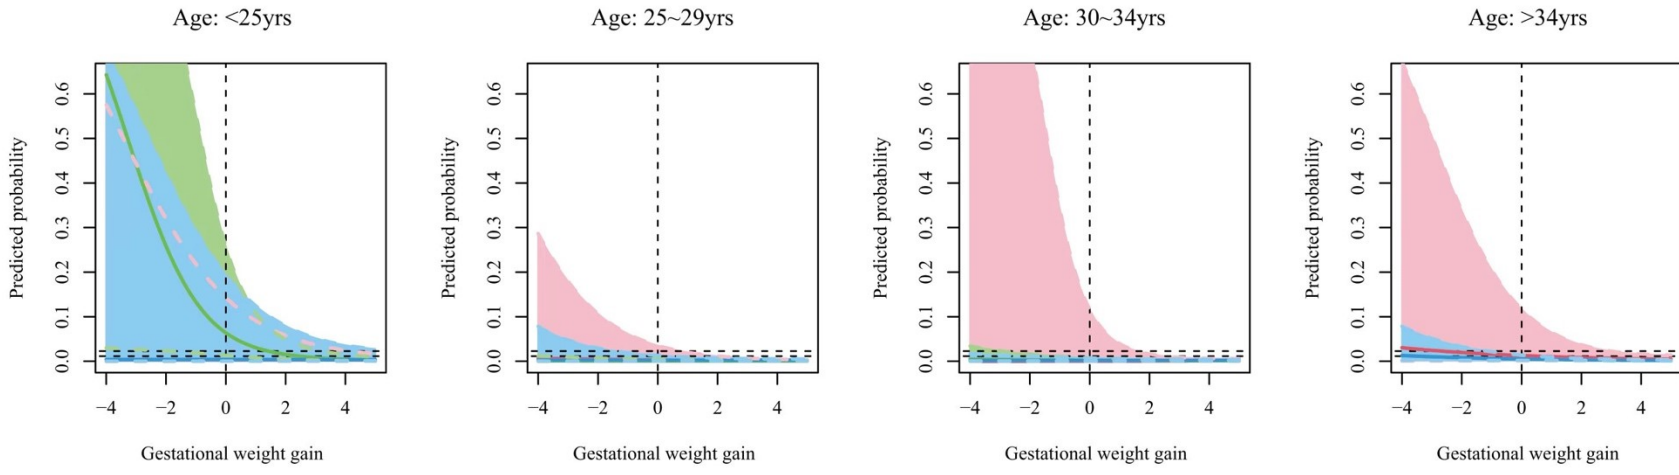

(e) **Stillbirth** (Red: Normal weight, Green: Underweight, Blue: Overweight/obese)

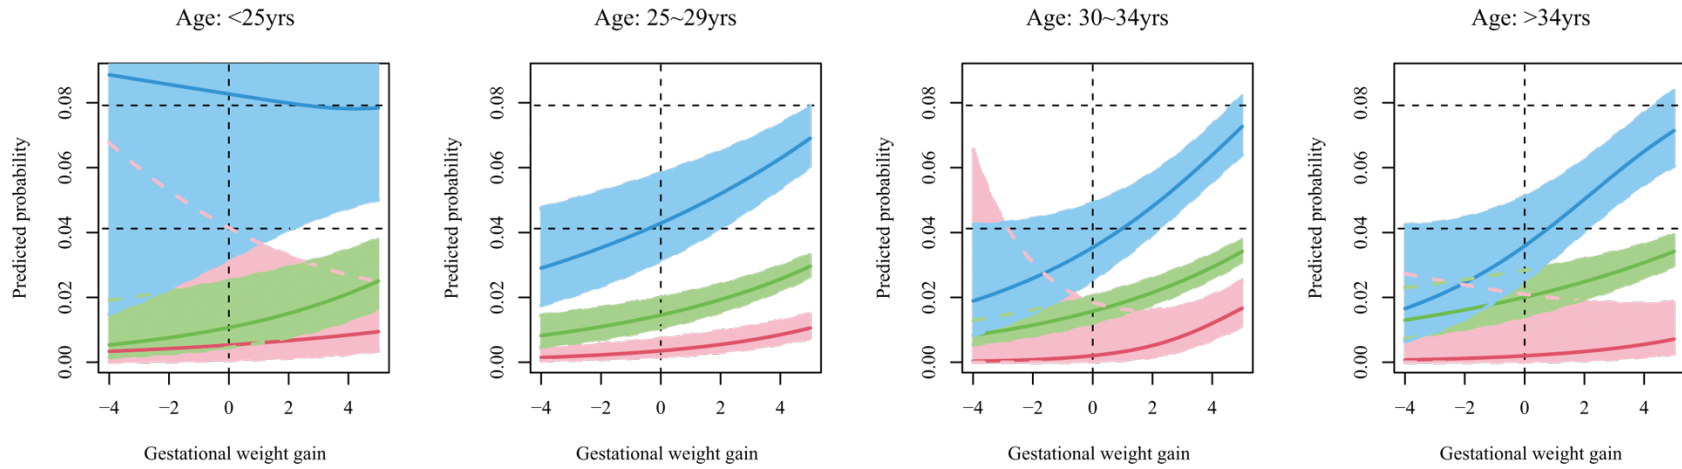

(f) **Macrosomia** (Red: Normal weight, Green: Underweight, Blue: Overweight/obese)

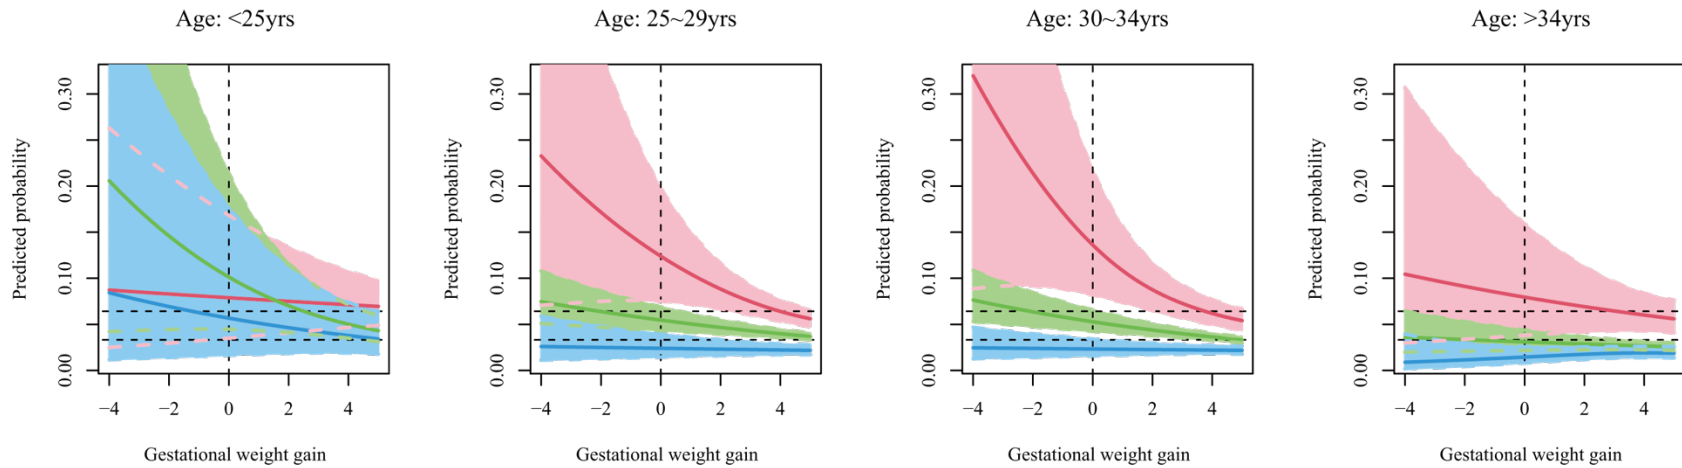

(g) **Small for gestational age** (Red: Normal weight, Green: Underweight, Blue: Overweight/obese)

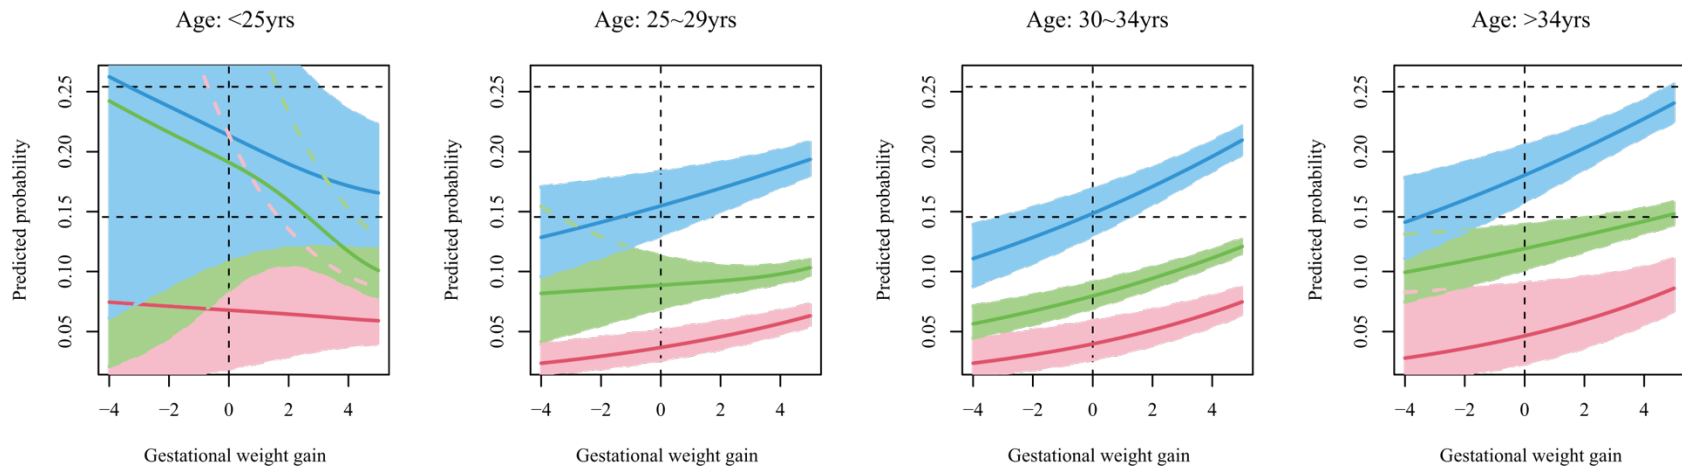

(h) **Large for gestational age** (Red: Normal weight, Green: Underweight, Blue: Overweight/obese)

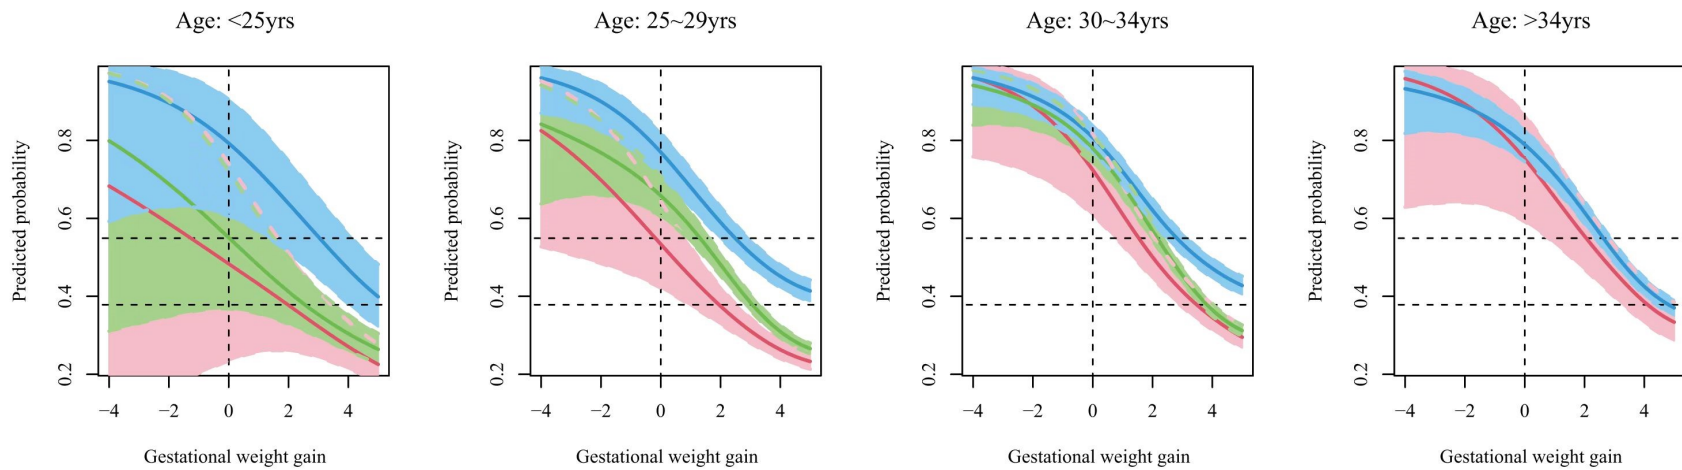

(i) **All disease** (Red: Normal weight, Green: Underweight, Blue: Overweight/obese)



## 2.1

### Gestational diabetes mellitus

| Age         |                             | <25 yrs                  |                               |                             | 25-29 yrs                |                               |
|-------------|-----------------------------|--------------------------|-------------------------------|-----------------------------|--------------------------|-------------------------------|
| Weight gain | Normal weight<br>(n=1,324)  | Underweight<br>(n=698)   | Overweight/Obese<br>(n=314)   | Normal weight<br>(n=12,406) | Underweight<br>(n=3,943) | Overweight/Obese<br>(n=3,249) |
| -5          | 0.681 [0.059 - 0.986]       | 0.376 [0.053 - 0.867]    | 0.851 [0.391 - 0.981]         | 0.849 [0.461 - 0.974]       | 0.810 [0.485 - 0.951]    | 0.962 [0.867 - 0.990]         |
| -4.5        | 0.640 [0.062 - 0.979]       | 0.354 [0.056 - 0.834]    | 0.827 [0.392 - 0.973]         | 0.819 [0.446 - 0.962]       | 0.797 [0.511 - 0.936]    | 0.952 [0.856 - 0.985]         |
| -4          | 0.596 [0.065 - 0.969]       | 0.333 [0.060 - 0.795]    | 0.800 [0.392 - 0.961]         | 0.785 [0.431 - 0.946]       | 0.783 [0.536 - 0.919]    | 0.940 [0.844 - 0.978]         |
| -3.5        | 0.551 [0.067 - 0.954]       | 0.313 [0.065 - 0.750]    | 0.771 [0.391 - 0.946]         | 0.747 [0.416 - 0.924]       | 0.768 [0.559 - 0.897]    | 0.924 [0.830 - 0.968]         |
| -3          | 0.505 [0.070 - 0.933]       | 0.294 [0.069 - 0.699]    | 0.738 [0.388 - 0.926]         | 0.704 [0.400 - 0.894]       | 0.752 [0.577 - 0.871]    | 0.904 [0.813 - 0.954]         |
| -2.5        | 0.460 [0.073 - 0.902]       | 0.275 [0.074 - 0.643]    | 0.703 [0.385 - 0.900]         | 0.657 [0.384 - 0.854]       | 0.734 [0.589 - 0.842]    | 0.880 [0.793 - 0.934]         |
| -2          | 0.414 [0.076 - 0.859]       | 0.257 [0.078 - 0.584]    | 0.665 [0.378 - 0.867]         | 0.607 [0.368 - 0.804]       | 0.713 [0.594 - 0.809]    | 0.851 [0.768 - 0.908]         |
| -1.5        | 0.370 [0.078 - 0.803]       | 0.240 [0.083 - 0.523]    | 0.625 [0.369 - 0.826]         | 0.554 [0.350 - 0.741]       | 0.689 [0.590 - 0.773]    | 0.817 [0.738 - 0.876]         |
| -1          | 0.329 [0.080 - 0.732]       | 0.223 [0.087 - 0.463]    | 0.584 [0.357 - 0.780]         | 0.501 [0.331 - 0.670]       | 0.659 [0.577 - 0.733]    | 0.776 [0.703 - 0.836]         |
| -0.5        | 0.289 [0.082 - 0.649]       | 0.208 [0.091 - 0.406]    | 0.541 [0.342 - 0.728]         | 0.447 [0.311 - 0.593]       | 0.624 [0.556 - 0.688]    | 0.731 [0.663 - 0.789]         |
| Mean        | 0.253 [0.083 - 0.558]       | 0.193 [0.094 - 0.354]    | 0.499 [0.325 - 0.673]         | 0.396 [0.287 - 0.516]       | 0.582 [0.525 - 0.636]    | 0.681 [0.619 - 0.736]         |
| 0.5         | 0.220 [0.083 - 0.466]       | 0.179 [0.096 - 0.308]    | 0.457 [0.306 - 0.616]         | 0.348 [0.263 - 0.444]       | 0.533 [0.486 - 0.579]    | 0.627 [0.571 - 0.680]         |
| 1           | 0.190 [0.081 - 0.382]       | 0.166 [0.097 - 0.268]    | 0.417 [0.286 - 0.560]         | 0.303 [0.237 - 0.378]       | 0.477 [0.438 - 0.517]    | 0.573 [0.522 - 0.622]         |
| 1.5         | 0.163 [0.078 - 0.310]       | 0.153 [0.097 - 0.235]    | 0.378 [0.265 - 0.507]         | 0.263 [0.213 - 0.321]       | 0.418 [0.385 - 0.453]    | 0.518 [0.473 - 0.562]         |
| 2           | 0.139 [0.072 - 0.250]       | 0.142 [0.095 - 0.206]    | 0.343 [0.244 - 0.457]         | 0.227 [0.189 - 0.271]       | 0.359 [0.331 - 0.387]    | 0.464 [0.425 - 0.504]         |
| 2.5         | 0.118 [0.066 - 0.201]       | 0.131 [0.093 - 0.183]    | 0.310 [0.224 - 0.412]         | 0.196 [0.166 - 0.230]       | 0.302 [0.279 - 0.325]    | 0.413 [0.379 - 0.449]         |
| 3           | 0.100 [0.059 - 0.163]       | 0.122 [0.089 - 0.165]    | 0.279 [0.203 - 0.371]         | 0.169 [0.145 - 0.196]       | 0.250 [0.232 - 0.270]    | 0.365 [0.335 - 0.397]         |
| 3.5         | 0.084 [0.052 - 0.133]       | 0.114 [0.086 - 0.150]    | 0.251 [0.183 - 0.334]         | 0.146 [0.126 - 0.168]       | 0.207 [0.191 - 0.223]    | 0.322 [0.295 - 0.351]         |
| 4           | 0.071 [0.045 - 0.110]       | 0.107 [0.082 - 0.138]    | 0.225 [0.165 - 0.300]         | 0.127 [0.111 - 0.146]       | 0.172 [0.159 - 0.186]    | 0.285 [0.261 - 0.311]         |
| 4.5         | 0.060 [0.039 - 0.093]       | 0.100 [0.078 - 0.128]    | 0.202 [0.147 - 0.271]         | 0.112 [0.098 - 0.129]       | 0.145 [0.134 - 0.156]    | 0.254 [0.232 - 0.278]         |
| 5           | 0.052 [0.033 - 0.080]       | 0.095 [0.074 - 0.120]    | 0.182 [0.132 - 0.245]         | 0.101 [0.088 - 0.115]       | 0.124 [0.114 - 0.134]    | 0.230 [0.209 - 0.252]         |
| Age         |                             | 30-34 yrs                |                               |                             | >34 yrs                  |                               |
| Weight gain | Normal weight<br>(n=12,302) | Underweight<br>(n=2,460) | Overweight/Obese<br>(n=5,749) | Normal weight<br>(n=5,750)  | Underweight<br>(n=704)   | Overweight/Obese<br>(n=3,221) |
| -5          | 0.963 [0.703 - 0.996]       | 0.937 [0.771 - 0.985]    | 0.976 [0.918 - 0.993]         | 0.983 [0.715 - 0.999]       | 0.924 [0.734 - 0.981]    | 0.942 [0.847 - 0.979]         |
| -4.5        | 0.951 [0.691 - 0.994]       | 0.928 [0.780 - 0.979]    | 0.970 [0.912 - 0.990]         | 0.976 [0.705 - 0.999]       | 0.917 [0.754 - 0.975]    | 0.934 [0.847 - 0.973]         |
| -4          | 0.935 [0.678 - 0.990]       | 0.917 [0.788 - 0.970]    | 0.961 [0.904 - 0.985]         | 0.967 [0.694 - 0.997]       | 0.908 [0.768 - 0.967]    | 0.925 [0.846 - 0.965]         |
| -3.5        | 0.915 [0.664 - 0.983]       | 0.905 [0.792 - 0.959]    | 0.951 [0.894 - 0.978]         | 0.955 [0.682 - 0.995]       | 0.899 [0.778 - 0.958]    | 0.914 [0.843 - 0.955]         |
| -3          | 0.890 [0.649 - 0.973]       | 0.891 [0.794 - 0.945]    | 0.937 [0.881 - 0.968]         | 0.939 [0.669 - 0.991]       | 0.887 [0.782 - 0.945]    | 0.902 [0.837 - 0.943]         |
| -2.5        | 0.859 [0.630 - 0.956]       | 0.874 [0.791 - 0.928]    | 0.920 [0.866 - 0.954]         | 0.917 [0.655 - 0.985]       | 0.873 [0.780 - 0.930]    | 0.888 [0.829 - 0.928]         |
| -2          | 0.821 [0.608 - 0.931]       | 0.855 [0.783 - 0.906]    | 0.899 [0.847 - 0.935]         | 0.888 [0.637 - 0.973]       | 0.855 [0.774 - 0.910]    | 0.870 [0.817 - 0.910]         |
| -1.5        | 0.774 [0.582 - 0.895]       | 0.832 [0.769 - 0.880]    | 0.873 [0.823 - 0.911]         | 0.851 [0.615 - 0.953]       | 0.833 [0.763 - 0.886]    | 0.850 [0.801 - 0.888]         |
| -1          | 0.721 [0.550 - 0.845]       | 0.803 [0.749 - 0.848]    | 0.841 [0.794 - 0.879]         | 0.804 [0.587 - 0.922]       | 0.806 [0.745 - 0.856]    | 0.825 [0.780 - 0.863]         |
| -0.5        | 0.661 [0.513 - 0.782]       | 0.768 [0.721 - 0.810]    | 0.801 [0.757 - 0.839]         | 0.748 [0.552 - 0.877]       | 0.775 [0.720 - 0.821]    | 0.795 [0.753 - 0.831]         |
| Mean        | 0.596 [0.473 - 0.707]       | 0.725 [0.684 - 0.762]    | 0.754 [0.712 - 0.791]         | 0.683 [0.512 - 0.815]       | 0.737 [0.688 - 0.780]    | 0.759 [0.720 - 0.794]         |
| 0.5         | 0.529 [0.430 - 0.625]       | 0.671 [0.635 - 0.706]    | 0.699 [0.660 - 0.735]         | 0.611 [0.467 - 0.739]       | 0.692 [0.649 - 0.732]    | 0.717 [0.680 - 0.752]         |
| 1           | 0.463 [0.385 - 0.543]       | 0.608 [0.575 - 0.640]    | 0.637 [0.602 - 0.671]         | 0.538 [0.418 - 0.653]       | 0.641 [0.603 - 0.678]    | 0.670 [0.634 - 0.704]         |
| 1.5         | 0.402 [0.340 - 0.467]       | 0.536 [0.507 - 0.566]    | 0.573 [0.540 - 0.605]         | 0.466 [0.369 - 0.567]       | 0.583 [0.549 - 0.617]    | 0.619 [0.585 - 0.652]         |
| 2           | 0.347 [0.297 - 0.400]       | 0.461 [0.435 - 0.486]    | 0.508 [0.478 - 0.538]         | 0.401 [0.321 - 0.486]       | 0.519 [0.488 - 0.550]    | 0.565 [0.533 - 0.597]         |
| 2.5         | 0.299 [0.258 - 0.343]       | 0.387 [0.366 - 0.409]    | 0.447 [0.419 - 0.475]         | 0.344 [0.278 - 0.416]       | 0.451 [0.423 - 0.479]    | 0.511 [0.480 - 0.542]         |
| 3           | 0.257 [0.224 - 0.295]       | 0.321 [0.303 - 0.340]    | 0.390 [0.366 - 0.416]         | 0.296 [0.240 - 0.358]       | 0.385 [0.360 - 0.410]    | 0.459 [0.429 - 0.489]         |
| 3.5         | 0.222 [0.193 - 0.254]       | 0.267 [0.251 - 0.283]    | 0.340 [0.317 - 0.363]         | 0.256 [0.208 - 0.310]       | 0.325 [0.302 - 0.348]    | 0.411 [0.383 - 0.439]         |
| 4           | 0.191 [0.167 - 0.219]       | 0.224 [0.211 - 0.238]    | 0.295 [0.274 - 0.318]         | 0.223 [0.181 - 0.272]       | 0.274 [0.255 - 0.295]    | 0.369 [0.342 - 0.396]         |
| 4.5         | 0.165 [0.143 - 0.189]       | 0.191 [0.179 - 0.203]    | 0.257 [0.237 - 0.278]         | 0.196 [0.158 - 0.241]       | 0.235 [0.217 - 0.254]    | 0.332 [0.307 - 0.359]         |
| 5           | 0.141 [0.122 - 0.163]       | 0.165 [0.154 - 0.177]    | 0.225 [0.206 - 0.244]         | 0.173 [0.138 - 0.215]       | 0.204 [0.188 - 0.222]    | 0.302 [0.277 - 0.328]         |

## 2.2

### Preeclampsia

| Age         |                             | <25 yrs                  |                               |  | 25-29 yrs                   |                          |                               |
|-------------|-----------------------------|--------------------------|-------------------------------|--|-----------------------------|--------------------------|-------------------------------|
| Weight gain | Normal weight<br>(n=1,324)  | Underweight<br>(n=698)   | Overweight/Obese<br>(n=314)   |  | Normal weight<br>(n=12,406) | Underweight<br>(n=3,943) | Overweight/Obese<br>(n=3,249) |
| -5          | 0.001 [0.000 - 0.429]       | 0.842 [0.043 - 0.998]    | 0.005 [0.000 - 0.183]         |  | 0.001 [0.000 - 0.005]       | 0.001 [0.000 - 0.003]    | 0.008 [0.001 - 0.040]         |
| -4.5        | 0.001 [0.000 - 0.372]       | 0.775 [0.041 - 0.996]    | 0.006 [0.000 - 0.166]         |  | 0.001 [0.000 - 0.005]       | 0.001 [0.001 - 0.003]    | 0.008 [0.002 - 0.037]         |
| -4          | 0.001 [0.000 - 0.319]       | 0.691 [0.038 - 0.992]    | 0.006 [0.000 - 0.150]         |  | 0.001 [0.000 - 0.005]       | 0.001 [0.001 - 0.003]    | 0.008 [0.002 - 0.035]         |
| -3.5        | 0.001 [0.000 - 0.270]       | 0.592 [0.035 - 0.983]    | 0.007 [0.000 - 0.136]         |  | 0.001 [0.000 - 0.005]       | 0.002 [0.001 - 0.004]    | 0.009 [0.002 - 0.033]         |
| -3          | 0.002 [0.000 - 0.227]       | 0.485 [0.033 - 0.963]    | 0.007 [0.000 - 0.123]         |  | 0.001 [0.000 - 0.005]       | 0.002 [0.001 - 0.004]    | 0.009 [0.003 - 0.031]         |
| -2.5        | 0.002 [0.000 - 0.189]       | 0.379 [0.030 - 0.923]    | 0.008 [0.000 - 0.112]         |  | 0.001 [0.000 - 0.005]       | 0.002 [0.001 - 0.004]    | 0.010 [0.003 - 0.030]         |
| -2          | 0.002 [0.000 - 0.157]       | 0.283 [0.027 - 0.847]    | 0.008 [0.001 - 0.102]         |  | 0.001 [0.000 - 0.005]       | 0.002 [0.001 - 0.004]    | 0.010 [0.004 - 0.028]         |
| -1.5        | 0.002 [0.000 - 0.129]       | 0.204 [0.025 - 0.723]    | 0.009 [0.001 - 0.093]         |  | 0.001 [0.000 - 0.005]       | 0.002 [0.001 - 0.004]    | 0.011 [0.004 - 0.027]         |
| -1          | 0.002 [0.000 - 0.107]       | 0.143 [0.022 - 0.558]    | 0.010 [0.001 - 0.086]         |  | 0.002 [0.000 - 0.006]       | 0.002 [0.001 - 0.005]    | 0.011 [0.005 - 0.026]         |
| -0.5        | 0.002 [0.000 - 0.088]       | 0.098 [0.018 - 0.387]    | 0.010 [0.001 - 0.079]         |  | 0.002 [0.001 - 0.006]       | 0.003 [0.001 - 0.005]    | 0.012 [0.005 - 0.025]         |
| Mean        | 0.002 [0.000 - 0.073]       | 0.067 [0.015 - 0.251]    | 0.011 [0.002 - 0.074]         |  | 0.002 [0.001 - 0.006]       | 0.003 [0.002 - 0.005]    | 0.012 [0.006 - 0.024]         |
| 0.5         | 0.002 [0.000 - 0.060]       | 0.046 [0.012 - 0.160]    | 0.012 [0.002 - 0.069]         |  | 0.002 [0.001 - 0.006]       | 0.003 [0.002 - 0.005]    | 0.013 [0.007 - 0.024]         |
| 1           | 0.003 [0.000 - 0.050]       | 0.032 [0.010 - 0.104]    | 0.013 [0.002 - 0.065]         |  | 0.002 [0.001 - 0.006]       | 0.003 [0.002 - 0.006]    | 0.013 [0.007 - 0.023]         |
| 1.5         | 0.003 [0.000 - 0.042]       | 0.024 [0.008 - 0.070]    | 0.014 [0.003 - 0.061]         |  | 0.003 [0.001 - 0.006]       | 0.004 [0.002 - 0.006]    | 0.014 [0.008 - 0.023]         |
| 2           | 0.003 [0.000 - 0.036]       | 0.018 [0.006 - 0.050]    | 0.015 [0.004 - 0.059]         |  | 0.003 [0.001 - 0.007]       | 0.004 [0.003 - 0.006]    | 0.014 [0.009 - 0.023]         |
| 2.5         | 0.003 [0.000 - 0.031]       | 0.015 [0.006 - 0.038]    | 0.016 [0.004 - 0.056]         |  | 0.003 [0.001 - 0.007]       | 0.004 [0.003 - 0.006]    | 0.015 [0.010 - 0.023]         |
| 3           | 0.003 [0.000 - 0.027]       | 0.013 [0.005 - 0.030]    | 0.017 [0.005 - 0.055]         |  | 0.003 [0.002 - 0.007]       | 0.005 [0.003 - 0.007]    | 0.016 [0.011 - 0.023]         |
| 3.5         | 0.003 [0.000 - 0.024]       | 0.011 [0.005 - 0.026]    | 0.018 [0.006 - 0.053]         |  | 0.004 [0.002 - 0.007]       | 0.005 [0.004 - 0.007]    | 0.017 [0.012 - 0.023]         |
| 4           | 0.004 [0.001 - 0.021]       | 0.011 [0.005 - 0.023]    | 0.019 [0.007 - 0.052]         |  | 0.004 [0.002 - 0.007]       | 0.006 [0.004 - 0.008]    | 0.017 [0.013 - 0.024]         |
| 4.5         | 0.004 [0.001 - 0.019]       | 0.011 [0.005 - 0.022]    | 0.021 [0.008 - 0.052]         |  | 0.004 [0.002 - 0.008]       | 0.006 [0.005 - 0.008]    | 0.018 [0.014 - 0.025]         |
| 5           | 0.004 [0.001 - 0.018]       | 0.011 [0.005 - 0.022]    | 0.022 [0.009 - 0.052]         |  | 0.005 [0.003 - 0.008]       | 0.007 [0.005 - 0.008]    | 0.019 [0.015 - 0.026]         |
| Age         |                             | 30-34 yrs                |                               |  |                             | >34 yrs                  |                               |
| Weight gain | Normal weight<br>(n=12,302) | Underweight<br>(n=2,460) | Overweight/Obese<br>(n=4,749) |  | Normal weight<br>(n=5,750)  | Underweight<br>(n=704)   | Overweight/Obese<br>(n=3,221) |
| -5          | 0.009 [0.001 - 0.084]       | 0.019 [0.003 - 0.113]    | 0.009 [0.005 - 0.019]         |  | 0.001 [0.000 - 0.159]       | 0.004 [0.002 - 0.010]    | 0.005 [0.000 - 0.069]         |
| -4.5        | 0.009 [0.001 - 0.075]       | 0.018 [0.003 - 0.092]    | 0.010 [0.005 - 0.019]         |  | 0.001 [0.000 - 0.136]       | 0.004 [0.002 - 0.011]    | 0.007 [0.001 - 0.062]         |
| -4          | 0.009 [0.001 - 0.068]       | 0.016 [0.003 - 0.075]    | 0.011 [0.006 - 0.020]         |  | 0.001 [0.000 - 0.116]       | 0.005 [0.002 - 0.011]    | 0.008 [0.001 - 0.056]         |
| -3.5        | 0.009 [0.001 - 0.061]       | 0.015 [0.004 - 0.061]    | 0.011 [0.006 - 0.020]         |  | 0.002 [0.000 - 0.099]       | 0.005 [0.002 - 0.011]    | 0.010 [0.002 - 0.052]         |
| -3          | 0.009 [0.001 - 0.054]       | 0.014 [0.004 - 0.050]    | 0.012 [0.007 - 0.021]         |  | 0.002 [0.000 - 0.084]       | 0.005 [0.002 - 0.011]    | 0.012 [0.003 - 0.049]         |
| -2.5        | 0.009 [0.002 - 0.049]       | 0.013 [0.004 - 0.041]    | 0.012 [0.007 - 0.021]         |  | 0.002 [0.000 - 0.072]       | 0.005 [0.003 - 0.012]    | 0.014 [0.004 - 0.047]         |
| -2          | 0.009 [0.002 - 0.043]       | 0.013 [0.005 - 0.034]    | 0.013 [0.008 - 0.022]         |  | 0.002 [0.000 - 0.062]       | 0.006 [0.003 - 0.012]    | 0.018 [0.006 - 0.047]         |
| -1.5        | 0.008 [0.002 - 0.039]       | 0.012 [0.005 - 0.029]    | 0.014 [0.009 - 0.022]         |  | 0.003 [0.000 - 0.054]       | 0.006 [0.003 - 0.012]    | 0.021 [0.009 - 0.048]         |
| -1          | 0.008 [0.002 - 0.035]       | 0.011 [0.005 - 0.024]    | 0.015 [0.009 - 0.023]         |  | 0.003 [0.000 - 0.047]       | 0.007 [0.004 - 0.012]    | 0.025 [0.013 - 0.050]         |
| -0.5        | 0.008 [0.002 - 0.031]       | 0.010 [0.005 - 0.021]    | 0.016 [0.010 - 0.023]         |  | 0.003 [0.000 - 0.042]       | 0.007 [0.004 - 0.013]    | 0.030 [0.017 - 0.052]         |
| Mean        | 0.008 [0.002 - 0.028]       | 0.010 [0.005 - 0.018]    | 0.016 [0.011 - 0.024]         |  | 0.004 [0.000 - 0.037]       | 0.007 [0.004 - 0.013]    | 0.034 [0.021 - 0.055]         |
| 0.5         | 0.008 [0.002 - 0.025]       | 0.009 [0.005 - 0.016]    | 0.017 [0.012 - 0.025]         |  | 0.004 [0.001 - 0.034]       | 0.008 [0.005 - 0.013]    | 0.038 [0.025 - 0.057]         |
| 1           | 0.008 [0.003 - 0.023]       | 0.009 [0.006 - 0.014]    | 0.018 [0.013 - 0.025]         |  | 0.005 [0.001 - 0.031]       | 0.009 [0.005 - 0.014]    | 0.041 [0.028 - 0.058]         |
| 1.5         | 0.008 [0.003 - 0.020]       | 0.009 [0.006 - 0.013]    | 0.019 [0.014 - 0.026]         |  | 0.006 [0.001 - 0.029]       | 0.009 [0.006 - 0.014]    | 0.041 [0.030 - 0.057]         |
| 2           | 0.008 [0.003 - 0.018]       | 0.008 [0.006 - 0.012]    | 0.020 [0.016 - 0.027]         |  | 0.006 [0.001 - 0.027]       | 0.010 [0.007 - 0.014]    | 0.041 [0.030 - 0.055]         |
| 2.5         | 0.007 [0.003 - 0.017]       | 0.008 [0.006 - 0.012]    | 0.022 [0.017 - 0.028]         |  | 0.007 [0.002 - 0.026]       | 0.010 [0.007 - 0.015]    | 0.039 [0.029 - 0.052]         |
| 3           | 0.007 [0.004 - 0.015]       | 0.008 [0.006 - 0.011]    | 0.023 [0.018 - 0.029]         |  | 0.008 [0.003 - 0.025]       | 0.011 [0.008 - 0.015]    | 0.037 [0.028 - 0.049]         |
| 3.5         | 0.007 [0.004 - 0.014]       | 0.008 [0.006 - 0.011]    | 0.024 [0.020 - 0.030]         |  | 0.009 [0.003 - 0.025]       | 0.012 [0.009 - 0.016]    | 0.035 [0.027 - 0.047]         |
| 4           | 0.007 [0.004 - 0.013]       | 0.009 [0.007 - 0.011]    | 0.025 [0.021 - 0.031]         |  | 0.010 [0.004 - 0.025]       | 0.012 [0.009 - 0.016]    | 0.034 [0.026 - 0.045]         |
| 4.5         | 0.007 [0.004 - 0.012]       | 0.009 [0.007 - 0.011]    | 0.027 [0.022 - 0.032]         |  | 0.012 [0.005 - 0.026]       | 0.013 [0.010 - 0.017]    | 0.034 [0.025 - 0.045]         |
| 5           | 0.007 [0.004 - 0.011]       | 0.009 [0.007 - 0.012]    | 0.028 [0.024 - 0.034]         |  | 0.013 [0.006 - 0.027]       | 0.014 [0.011 - 0.018]    | 0.034 [0.025 - 0.045]         |

## 2.3

## Cesarean delivery

| Age         |                             | <25 yrs                  |                               |  | 25-29 yrs                   |                          |                               |
|-------------|-----------------------------|--------------------------|-------------------------------|--|-----------------------------|--------------------------|-------------------------------|
| Weight gain | Normal weight<br>(n=1,324)  | Underweight<br>(n=698)   | Overweight/Obese<br>(n=314)   |  | Normal weight<br>(n=12,406) | Underweight<br>(n=3,943) | Overweight/Obese<br>(n=3,249) |
| -5          | 0.321 [0.184 - 0.499]       | 0.375 [0.267 - 0.497]    | 0.362 [0.057 - 0.841]         |  | 0.200 [0.080 - 0.416]       | 0.304 [0.267 - 0.343]    | 0.574 [0.459 - 0.682]         |
| -4.5        | 0.323 [0.190 - 0.493]       | 0.378 [0.273 - 0.495]    | 0.371 [0.071 - 0.821]         |  | 0.207 [0.090 - 0.410]       | 0.311 [0.275 - 0.348]    | 0.574 [0.467 - 0.675]         |
| -4          | 0.325 [0.195 - 0.487]       | 0.380 [0.279 - 0.493]    | 0.381 [0.087 - 0.799]         |  | 0.216 [0.100 - 0.403]       | 0.318 [0.284 - 0.354]    | 0.574 [0.476 - 0.667]         |
| -3.5        | 0.326 [0.201 - 0.482]       | 0.383 [0.286 - 0.490]    | 0.391 [0.107 - 0.776]         |  | 0.224 [0.112 - 0.397]       | 0.325 [0.292 - 0.359]    | 0.574 [0.484 - 0.660]         |
| -3          | 0.328 [0.207 - 0.476]       | 0.385 [0.292 - 0.488]    | 0.401 [0.129 - 0.752]         |  | 0.232 [0.125 - 0.391]       | 0.332 [0.301 - 0.365]    | 0.575 [0.492 - 0.653]         |
| -2.5        | 0.329 [0.213 - 0.471]       | 0.388 [0.298 - 0.486]    | 0.411 [0.154 - 0.728]         |  | 0.241 [0.138 - 0.386]       | 0.339 [0.309 - 0.371]    | 0.575 [0.500 - 0.647]         |
| -2          | 0.331 [0.219 - 0.465]       | 0.391 [0.305 - 0.484]    | 0.421 [0.182 - 0.704]         |  | 0.250 [0.153 - 0.381]       | 0.347 [0.318 - 0.377]    | 0.575 [0.507 - 0.640]         |
| -1.5        | 0.332 [0.226 - 0.460]       | 0.393 [0.311 - 0.482]    | 0.431 [0.211 - 0.683]         |  | 0.259 [0.169 - 0.376]       | 0.354 [0.327 - 0.383]    | 0.575 [0.513 - 0.635]         |
| -1          | 0.334 [0.232 - 0.455]       | 0.396 [0.318 - 0.479]    | 0.441 [0.239 - 0.664]         |  | 0.269 [0.186 - 0.372]       | 0.362 [0.336 - 0.388]    | 0.575 [0.520 - 0.629]         |
| -0.5        | 0.336 [0.238 - 0.449]       | 0.398 [0.324 - 0.477]    | 0.450 [0.267 - 0.648]         |  | 0.279 [0.203 - 0.369]       | 0.369 [0.345 - 0.395]    | 0.575 [0.525 - 0.624]         |
| Mean        | 0.337 [0.245 - 0.444]       | 0.401 [0.331 - 0.475]    | 0.459 [0.294 - 0.633]         |  | 0.288 [0.221 - 0.367]       | 0.377 [0.354 - 0.401]    | 0.576 [0.531 - 0.619]         |
| 0.5         | 0.339 [0.251 - 0.439]       | 0.404 [0.338 - 0.473]    | 0.467 [0.318 - 0.621]         |  | 0.299 [0.238 - 0.367]       | 0.385 [0.363 - 0.407]    | 0.576 [0.536 - 0.615]         |
| 1           | 0.340 [0.258 - 0.434]       | 0.406 [0.344 - 0.471]    | 0.473 [0.339 - 0.611]         |  | 0.309 [0.256 - 0.367]       | 0.393 [0.373 - 0.413]    | 0.576 [0.540 - 0.611]         |
| 1.5         | 0.342 [0.265 - 0.429]       | 0.409 [0.351 - 0.469]    | 0.478 [0.357 - 0.601]         |  | 0.320 [0.274 - 0.369]       | 0.401 [0.382 - 0.419]    | 0.577 [0.544 - 0.608]         |
| 2           | 0.344 [0.271 - 0.424]       | 0.411 [0.357 - 0.468]    | 0.481 [0.371 - 0.593]         |  | 0.331 [0.291 - 0.373]       | 0.408 [0.391 - 0.426]    | 0.577 [0.548 - 0.606]         |
| 2.5         | 0.345 [0.278 - 0.419]       | 0.414 [0.364 - 0.466]    | 0.483 [0.382 - 0.586]         |  | 0.341 [0.308 - 0.377]       | 0.416 [0.401 - 0.432]    | 0.578 [0.552 - 0.604]         |
| 3           | 0.347 [0.285 - 0.415]       | 0.417 [0.370 - 0.465]    | 0.485 [0.391 - 0.580]         |  | 0.352 [0.323 - 0.383]       | 0.424 [0.410 - 0.439]    | 0.579 [0.555 - 0.603]         |
| 3.5         | 0.349 [0.291 - 0.411]       | 0.419 [0.377 - 0.463]    | 0.486 [0.398 - 0.575]         |  | 0.362 [0.337 - 0.389]       | 0.433 [0.420 - 0.446]    | 0.581 [0.559 - 0.603]         |
| 4           | 0.350 [0.298 - 0.407]       | 0.422 [0.383 - 0.462]    | 0.488 [0.405 - 0.572]         |  | 0.372 [0.349 - 0.396]       | 0.441 [0.429 - 0.452]    | 0.583 [0.562 - 0.604]         |
| 4.5         | 0.352 [0.304 - 0.403]       | 0.425 [0.389 - 0.461]    | 0.490 [0.410 - 0.570]         |  | 0.380 [0.359 - 0.402]       | 0.449 [0.438 - 0.460]    | 0.585 [0.565 - 0.605]         |
| 5           | 0.354 [0.309 - 0.400]       | 0.427 [0.394 - 0.461]    | 0.492 [0.415 - 0.569]         |  | 0.388 [0.368 - 0.409]       | 0.457 [0.447 - 0.467]    | 0.588 [0.568 - 0.607]         |
| Age         |                             | 30-34 yrs                |                               |  |                             | >34 yrs                  |                               |
| Weight gain | Normal weight<br>(n=12,302) | Underweight<br>(n=2,460) | Overweight/Obese<br>(n=5,749) |  | Normal weight<br>(n=5,750)  | Underweight<br>(n=704)   | Overweight/Obese<br>(n=3,221) |
| -5          | 0.342 [0.263 - 0.432]       | 0.528 [0.420 - 0.634]    | 0.601 [0.545 - 0.654]         |  | 0.425 [0.253 - 0.618]       | 0.666 [0.606 - 0.722]    | 0.834 [0.738 - 0.899]         |
| -4.5        | 0.350 [0.273 - 0.437]       | 0.531 [0.432 - 0.627]    | 0.605 [0.552 - 0.656]         |  | 0.441 [0.272 - 0.624]       | 0.672 [0.615 - 0.724]    | 0.832 [0.746 - 0.893]         |
| -4          | 0.359 [0.283 - 0.441]       | 0.533 [0.444 - 0.621]    | 0.609 [0.559 - 0.657]         |  | 0.457 [0.293 - 0.630]       | 0.677 [0.623 - 0.726]    | 0.831 [0.754 - 0.887]         |
| -3.5        | 0.367 [0.294 - 0.446]       | 0.536 [0.456 - 0.615]    | 0.614 [0.566 - 0.659]         |  | 0.473 [0.315 - 0.637]       | 0.682 [0.632 - 0.728]    | 0.829 [0.761 - 0.881]         |
| -3          | 0.375 [0.305 - 0.450]       | 0.539 [0.467 - 0.609]    | 0.618 [0.573 - 0.660]         |  | 0.489 [0.337 - 0.643]       | 0.687 [0.640 - 0.730]    | 0.828 [0.768 - 0.875]         |
| -2.5        | 0.383 [0.316 - 0.455]       | 0.541 [0.478 - 0.604]    | 0.622 [0.580 - 0.662]         |  | 0.505 [0.360 - 0.650]       | 0.692 [0.649 - 0.733]    | 0.826 [0.773 - 0.869]         |
| -2          | 0.392 [0.328 - 0.460]       | 0.544 [0.488 - 0.599]    | 0.626 [0.587 - 0.664]         |  | 0.521 [0.384 - 0.656]       | 0.697 [0.657 - 0.735]    | 0.825 [0.778 - 0.864]         |
| -1.5        | 0.400 [0.339 - 0.464]       | 0.547 [0.497 - 0.595]    | 0.630 [0.594 - 0.665]         |  | 0.538 [0.408 - 0.662]       | 0.702 [0.665 - 0.737]    | 0.823 [0.782 - 0.858]         |
| -1          | 0.409 [0.351 - 0.469]       | 0.550 [0.506 - 0.592]    | 0.634 [0.601 - 0.667]         |  | 0.554 [0.432 - 0.669]       | 0.707 [0.673 - 0.739]    | 0.822 [0.785 - 0.853]         |
| -0.5        | 0.417 [0.363 - 0.474]       | 0.552 [0.515 - 0.589]    | 0.638 [0.607 - 0.668]         |  | 0.570 [0.457 - 0.675]       | 0.712 [0.681 - 0.742]    | 0.820 [0.788 - 0.849]         |
| Mean        | 0.426 [0.375 - 0.479]       | 0.556 [0.523 - 0.587]    | 0.642 [0.614 - 0.670]         |  | 0.585 [0.482 - 0.682]       | 0.717 [0.688 - 0.744]    | 0.819 [0.790 - 0.845]         |
| 0.5         | 0.434 [0.387 - 0.483]       | 0.559 [0.531 - 0.587]    | 0.647 [0.620 - 0.672]         |  | 0.601 [0.507 - 0.688]       | 0.722 [0.696 - 0.747]    | 0.818 [0.792 - 0.841]         |
| 1           | 0.443 [0.399 - 0.488]       | 0.563 [0.539 - 0.587]    | 0.651 [0.627 - 0.674]         |  | 0.616 [0.532 - 0.695]       | 0.727 [0.703 - 0.749]    | 0.817 [0.793 - 0.838]         |
| 1.5         | 0.452 [0.411 - 0.493]       | 0.567 [0.547 - 0.588]    | 0.655 [0.633 - 0.676]         |  | 0.632 [0.556 - 0.702]       | 0.731 [0.710 - 0.752]    | 0.816 [0.794 - 0.836]         |
| 2           | 0.461 [0.423 - 0.499]       | 0.572 [0.554 - 0.590]    | 0.659 [0.639 - 0.678]         |  | 0.647 [0.579 - 0.709]       | 0.736 [0.717 - 0.754]    | 0.816 [0.796 - 0.834]         |
| 2.5         | 0.469 [0.435 - 0.504]       | 0.577 [0.561 - 0.593]    | 0.663 [0.645 - 0.680]         |  | 0.661 [0.602 - 0.716]       | 0.741 [0.724 - 0.757]    | 0.816 [0.797 - 0.834]         |
| 3           | 0.478 [0.447 - 0.509]       | 0.582 [0.567 - 0.596]    | 0.666 [0.650 - 0.682]         |  | 0.676 [0.624 - 0.723]       | 0.745 [0.730 - 0.760]    | 0.816 [0.798 - 0.833]         |
| 3.5         | 0.487 [0.459 - 0.515]       | 0.586 [0.573 - 0.599]    | 0.670 [0.655 - 0.685]         |  | 0.690 [0.644 - 0.732]       | 0.750 [0.736 - 0.763]    | 0.818 [0.800 - 0.834]         |
| 4           | 0.496 [0.471 - 0.521]       | 0.591 [0.579 - 0.603]    | 0.674 [0.660 - 0.688]         |  | 0.703 [0.663 - 0.741]       | 0.754 [0.742 - 0.766]    | 0.819 [0.802 - 0.835]         |
| 4.5         | 0.505 [0.482 - 0.528]       | 0.596 [0.584 - 0.607]    | 0.678 [0.664 - 0.692]         |  | 0.717 [0.679 - 0.751]       | 0.759 [0.747 - 0.770]    | 0.821 [0.804 - 0.838]         |
| 5           | 0.513 [0.492 - 0.535]       | 0.600 [0.589 - 0.611]    | 0.682 [0.668 - 0.696]         |  | 0.730 [0.694 - 0.762]       | 0.763 [0.752 - 0.774]    | 0.824 [0.806 - 0.840]         |

## 2.4

## Preterm delivery

| Age         |                             | <25 yrs                  |                               |  | 25-29 yrs                   |                          |                               |
|-------------|-----------------------------|--------------------------|-------------------------------|--|-----------------------------|--------------------------|-------------------------------|
| Weight gain | Normal weight<br>(n=1,324)  | Underweight<br>(n=698)   | Overweight/Obese<br>(n=314)   |  | Normal weight<br>(n=12,406) | Underweight<br>(n=3,943) | Overweight/Obese<br>(n=3,249) |
| -5          | 0.455 [0.018 - 0.974]       | 0.046 [0.001 - 0.768]    | 0.130 [0.031 - 0.409]         |  | 0.265 [0.038 - 0.766]       | 0.132 [0.090 - 0.190]    | 0.156 [0.092 - 0.251]         |
| -4.5        | 0.426 [0.021 - 0.963]       | 0.049 [0.001 - 0.720]    | 0.127 [0.032 - 0.387]         |  | 0.239 [0.039 - 0.708]       | 0.124 [0.086 - 0.177]    | 0.147 [0.089 - 0.234]         |
| -4          | 0.397 [0.024 - 0.947]       | 0.052 [0.001 - 0.666]    | 0.124 [0.034 - 0.366]         |  | 0.215 [0.040 - 0.642]       | 0.117 [0.082 - 0.164]    | 0.139 [0.086 - 0.217]         |
| -3.5        | 0.369 [0.027 - 0.925]       | 0.055 [0.002 - 0.608]    | 0.121 [0.035 - 0.344]         |  | 0.193 [0.041 - 0.571]       | 0.110 [0.078 - 0.152]    | 0.131 [0.083 - 0.201]         |
| -3          | 0.342 [0.031 - 0.895]       | 0.058 [0.003 - 0.547]    | 0.119 [0.036 - 0.324]         |  | 0.172 [0.042 - 0.498]       | 0.103 [0.075 - 0.141]    | 0.124 [0.080 - 0.186]         |
| -2.5        | 0.316 [0.035 - 0.856]       | 0.062 [0.005 - 0.485]    | 0.116 [0.038 - 0.304]         |  | 0.154 [0.043 - 0.425]       | 0.097 [0.072 - 0.131]    | 0.117 [0.077 - 0.172]         |
| -2          | 0.291 [0.039 - 0.805]       | 0.065 [0.007 - 0.425]    | 0.113 [0.039 - 0.286]         |  | 0.137 [0.043 - 0.356]       | 0.091 [0.068 - 0.121]    | 0.110 [0.075 - 0.159]         |
| -1.5        | 0.267 [0.044 - 0.743]       | 0.069 [0.009 - 0.369]    | 0.111 [0.041 - 0.268]         |  | 0.121 [0.044 - 0.294]       | 0.086 [0.065 - 0.112]    | 0.104 [0.072 - 0.147]         |
| -1          | 0.245 [0.049 - 0.670]       | 0.073 [0.013 - 0.318]    | 0.108 [0.042 - 0.251]         |  | 0.108 [0.044 - 0.240]       | 0.080 [0.062 - 0.103]    | 0.098 [0.069 - 0.136]         |
| -0.5        | 0.224 [0.055 - 0.590]       | 0.077 [0.018 - 0.275]    | 0.106 [0.043 - 0.234]         |  | 0.095 [0.044 - 0.195]       | 0.075 [0.059 - 0.095]    | 0.092 [0.067 - 0.125]         |
| Mean        | 0.204 [0.060 - 0.507]       | 0.081 [0.024 - 0.239]    | 0.103 [0.045 - 0.219]         |  | 0.084 [0.043 - 0.159]       | 0.071 [0.057 - 0.088]    | 0.087 [0.065 - 0.115]         |
| 0.5         | 0.185 [0.065 - 0.428]       | 0.085 [0.031 - 0.212]    | 0.101 [0.046 - 0.205]         |  | 0.074 [0.041 - 0.130]       | 0.066 [0.054 - 0.081]    | 0.081 [0.062 - 0.106]         |
| 1           | 0.168 [0.068 - 0.357]       | 0.089 [0.039 - 0.191]    | 0.098 [0.048 - 0.192]         |  | 0.066 [0.040 - 0.107]       | 0.062 [0.051 - 0.075]    | 0.077 [0.060 - 0.098]         |
| 1.5         | 0.151 [0.070 - 0.297]       | 0.093 [0.047 - 0.174]    | 0.096 [0.049 - 0.179]         |  | 0.058 [0.038 - 0.089]       | 0.058 [0.049 - 0.069]    | 0.072 [0.057 - 0.090]         |
| 2           | 0.135 [0.069 - 0.247]       | 0.095 [0.054 - 0.160]    | 0.094 [0.050 - 0.168]         |  | 0.052 [0.036 - 0.075]       | 0.055 [0.047 - 0.064]    | 0.068 [0.055 - 0.083]         |
| 2.5         | 0.120 [0.067 - 0.205]       | 0.095 [0.060 - 0.149]    | 0.091 [0.051 - 0.158]         |  | 0.046 [0.033 - 0.064]       | 0.051 [0.044 - 0.059]    | 0.064 [0.052 - 0.077]         |
| 3           | 0.105 [0.063 - 0.171]       | 0.093 [0.062 - 0.138]    | 0.089 [0.052 - 0.148]         |  | 0.042 [0.031 - 0.056]       | 0.048 [0.042 - 0.055]    | 0.060 [0.050 - 0.071]         |
| 3.5         | 0.092 [0.057 - 0.144]       | 0.089 [0.062 - 0.127]    | 0.087 [0.053 - 0.140]         |  | 0.038 [0.029 - 0.049]       | 0.045 [0.040 - 0.050]    | 0.056 [0.047 - 0.066]         |
| 4           | 0.080 [0.051 - 0.122]       | 0.083 [0.059 - 0.116]    | 0.085 [0.054 - 0.133]         |  | 0.035 [0.027 - 0.044]       | 0.042 [0.038 - 0.047]    | 0.053 [0.045 - 0.062]         |
| 4.5         | 0.070 [0.046 - 0.105]       | 0.075 [0.054 - 0.103]    | 0.083 [0.054 - 0.126]         |  | 0.032 [0.025 - 0.041]       | 0.039 [0.035 - 0.043]    | 0.050 [0.042 - 0.058]         |
| 5           | 0.062 [0.041 - 0.092]       | 0.067 [0.048 - 0.092]    | 0.081 [0.053 - 0.121]         |  | 0.030 [0.024 - 0.038]       | 0.037 [0.033 - 0.040]    | 0.047 [0.039 - 0.055]         |
| Age         |                             | 30-34 yrs                |                               |  |                             | >34 yrs                  |                               |
| Weight gain | Normal weight<br>(n=12,302) | Underweight<br>(n=2,460) | Overweight/Obese<br>(n=4,749) |  | Normal weight<br>(n=5,750)  | Underweight<br>(n=704)   | Overweight/Obese<br>(n=3,221) |
| -5          | 0.262 [0.134 - 0.450]       | 0.148 [0.106 - 0.203]    | 0.099 [0.064 - 0.151]         |  | 0.200 [0.065 - 0.472]       | 0.132 [0.087 - 0.195]    | 0.140 [0.070 - 0.261]         |
| -4.5        | 0.244 [0.128 - 0.416]       | 0.139 [0.101 - 0.189]    | 0.095 [0.063 - 0.142]         |  | 0.191 [0.065 - 0.443]       | 0.126 [0.084 - 0.183]    | 0.134 [0.072 - 0.237]         |
| -4          | 0.227 [0.122 - 0.384]       | 0.131 [0.096 - 0.175]    | 0.092 [0.061 - 0.134]         |  | 0.182 [0.066 - 0.414]       | 0.120 [0.082 - 0.172]    | 0.129 [0.074 - 0.215]         |
| -3.5        | 0.211 [0.116 - 0.353]       | 0.123 [0.092 - 0.163]    | 0.088 [0.060 - 0.127]         |  | 0.174 [0.066 - 0.385]       | 0.114 [0.080 - 0.161]    | 0.123 [0.075 - 0.196]         |
| -3          | 0.195 [0.110 - 0.322]       | 0.115 [0.087 - 0.151]    | 0.085 [0.059 - 0.120]         |  | 0.166 [0.066 - 0.357]       | 0.109 [0.077 - 0.151]    | 0.118 [0.076 - 0.179]         |
| -2.5        | 0.181 [0.105 - 0.294]       | 0.108 [0.083 - 0.139]    | 0.082 [0.058 - 0.113]         |  | 0.158 [0.066 - 0.331]       | 0.104 [0.075 - 0.142]    | 0.112 [0.076 - 0.163]         |
| -2          | 0.167 [0.100 - 0.267]       | 0.101 [0.079 - 0.129]    | 0.078 [0.057 - 0.107]         |  | 0.150 [0.067 - 0.305]       | 0.099 [0.073 - 0.133]    | 0.107 [0.076 - 0.150]         |
| -1.5        | 0.154 [0.095 - 0.241]       | 0.095 [0.075 - 0.119]    | 0.075 [0.056 - 0.101]         |  | 0.143 [0.067 - 0.281]       | 0.094 [0.071 - 0.124]    | 0.102 [0.075 - 0.139]         |
| -1          | 0.142 [0.090 - 0.218]       | 0.089 [0.071 - 0.110]    | 0.073 [0.055 - 0.095]         |  | 0.136 [0.067 - 0.258]       | 0.090 [0.069 - 0.116]    | 0.098 [0.074 - 0.128]         |
| -0.5        | 0.131 [0.085 - 0.196]       | 0.083 [0.068 - 0.101]    | 0.070 [0.054 - 0.089]         |  | 0.130 [0.067 - 0.236]       | 0.086 [0.067 - 0.109]    | 0.093 [0.072 - 0.119]         |
| Mean        | 0.121 [0.081 - 0.176]       | 0.078 [0.064 - 0.093]    | 0.067 [0.053 - 0.084]         |  | 0.123 [0.067 - 0.216]       | 0.081 [0.065 - 0.102]    | 0.089 [0.070 - 0.111]         |
| 0.5         | 0.111 [0.077 - 0.157]       | 0.073 [0.061 - 0.086]    | 0.064 [0.052 - 0.080]         |  | 0.117 [0.067 - 0.198]       | 0.077 [0.063 - 0.095]    | 0.084 [0.068 - 0.104]         |
| 1           | 0.102 [0.073 - 0.141]       | 0.068 [0.058 - 0.079]    | 0.062 [0.051 - 0.075]         |  | 0.112 [0.067 - 0.180]       | 0.074 [0.061 - 0.089]    | 0.080 [0.066 - 0.098]         |
| 1.5         | 0.093 [0.069 - 0.126]       | 0.063 [0.055 - 0.073]    | 0.059 [0.050 - 0.071]         |  | 0.106 [0.067 - 0.165]       | 0.070 [0.059 - 0.083]    | 0.076 [0.063 - 0.092]         |
| 2           | 0.086 [0.065 - 0.112]       | 0.059 [0.052 - 0.068]    | 0.057 [0.048 - 0.067]         |  | 0.101 [0.066 - 0.150]       | 0.067 [0.057 - 0.078]    | 0.072 [0.060 - 0.087]         |
| 2.5         | 0.078 [0.061 - 0.100]       | 0.055 [0.049 - 0.062]    | 0.055 [0.047 - 0.064]         |  | 0.096 [0.066 - 0.137]       | 0.063 [0.055 - 0.073]    | 0.069 [0.058 - 0.082]         |
| 3           | 0.072 [0.057 - 0.090]       | 0.052 [0.046 - 0.058]    | 0.053 [0.046 - 0.061]         |  | 0.091 [0.065 - 0.126]       | 0.060 [0.053 - 0.069]    | 0.065 [0.055 - 0.078]         |
| 3.5         | 0.066 [0.053 - 0.081]       | 0.048 [0.044 - 0.053]    | 0.051 [0.044 - 0.058]         |  | 0.086 [0.063 - 0.116]       | 0.057 [0.051 - 0.065]    | 0.062 [0.052 - 0.074]         |
| 4           | 0.060 [0.050 - 0.073]       | 0.045 [0.041 - 0.049]    | 0.049 [0.043 - 0.055]         |  | 0.082 [0.062 - 0.108]       | 0.055 [0.049 - 0.061]    | 0.059 [0.050 - 0.070]         |
| 4.5         | 0.055 [0.046 - 0.066]       | 0.042 [0.038 - 0.046]    | 0.047 [0.041 - 0.053]         |  | 0.078 [0.059 - 0.102]       | 0.052 [0.046 - 0.058]    | 0.057 [0.048 - 0.068]         |
| 5           | 0.050 [0.042 - 0.060]       | 0.039 [0.036 - 0.043]    | 0.045 [0.039 - 0.052]         |  | 0.074 [0.056 - 0.096]       | 0.049 [0.044 - 0.055]    | 0.055 [0.045 - 0.065]         |

## 2.5

## Stillbirth

| Age         |                             | <25 yrs                  |                               |                             | 25-29 yrs                |                               |
|-------------|-----------------------------|--------------------------|-------------------------------|-----------------------------|--------------------------|-------------------------------|
| Weight gain | Normal weight<br>(n=1,324)  | Underweight<br>(n=698)   | Overweight/Obese<br>(n=314)   | Normal weight<br>(n=12,406) | Underweight<br>(n=3,943) | Overweight/Obese<br>(n=3,249) |
| -5          | 0.004 [0.000 - 0.698]       | 0.610 [0.027 - 0.989]    | 0.000 [0.000 - NaN]           | 0.000 [0.000 - 1.000]       | 0.001 [0.000 - 0.016]    | 0.002 [0.000 - 0.038]         |
| -4.5        | 0.004 [0.000 - 0.639]       | 0.530 [0.025 - 0.980]    | 0.000 [0.000 - NaN]           | 0.000 [0.000 - 1.000]       | 0.001 [0.000 - 0.014]    | 0.002 [0.000 - 0.032]         |
| -4          | 0.004 [0.000 - 0.575]       | 0.449 [0.023 - 0.965]    | 0.000 [0.000 - NaN]           | 0.000 [0.000 - 1.000]       | 0.001 [0.000 - 0.012]    | 0.002 [0.000 - 0.028]         |
| -3.5        | 0.004 [0.000 - 0.509]       | 0.370 [0.022 - 0.939]    | 0.000 [0.000 - NaN]           | 0.000 [0.000 - 1.000]       | 0.001 [0.000 - 0.011]    | 0.002 [0.000 - 0.024]         |
| -3          | 0.004 [0.000 - 0.443]       | 0.297 [0.020 - 0.896]    | 0.000 [0.000 - NaN]           | 0.000 [0.000 - 1.000]       | 0.001 [0.000 - 0.009]    | 0.002 [0.000 - 0.021]         |
| -2.5        | 0.004 [0.000 - 0.379]       | 0.234 [0.019 - 0.829]    | 0.000 [0.000 - NaN]           | 0.000 [0.000 - 0.998]       | 0.001 [0.000 - 0.008]    | 0.002 [0.000 - 0.018]         |
| -2          | 0.004 [0.000 - 0.320]       | 0.180 [0.017 - 0.733]    | 0.000 [0.000 - NaN]           | 0.000 [0.000 - 0.993]       | 0.001 [0.000 - 0.007]    | 0.002 [0.000 - 0.016]         |
| -1.5        | 0.004 [0.000 - 0.266]       | 0.137 [0.016 - 0.610]    | 0.000 [0.000 - NaN]           | 0.000 [0.000 - 0.969]       | 0.001 [0.000 - 0.006]    | 0.002 [0.000 - 0.014]         |
| -1          | 0.004 [0.000 - 0.218]       | 0.103 [0.014 - 0.475]    | 0.000 [0.000 - NaN]           | 0.000 [0.000 - 0.883]       | 0.001 [0.000 - 0.005]    | 0.002 [0.000 - 0.012]         |
| -0.5        | 0.004 [0.000 - 0.177]       | 0.076 [0.013 - 0.346]    | 0.000 [0.000 - NaN]           | 0.000 [0.000 - 0.669]       | 0.001 [0.000 - 0.005]    | 0.002 [0.000 - 0.011]         |
| Mean        | 0.003 [0.000 - 0.143]       | 0.056 [0.011 - 0.241]    | 0.000 [0.000 - NaN]           | 0.000 [0.000 - 0.383]       | 0.001 [0.000 - 0.004]    | 0.002 [0.000 - 0.010]         |
| 0.5         | 0.003 [0.000 - 0.114]       | 0.041 [0.010 - 0.163]    | 0.000 [0.000 - NaN]           | 0.001 [0.000 - 0.180]       | 0.001 [0.000 - 0.004]    | 0.002 [0.000 - 0.009]         |
| 1           | 0.003 [0.000 - 0.091]       | 0.030 [0.008 - 0.109]    | 0.000 [0.000 - NaN]           | 0.001 [0.000 - 0.081]       | 0.001 [0.000 - 0.003]    | 0.002 [0.001 - 0.008]         |
| 1.5         | 0.003 [0.000 - 0.073]       | 0.023 [0.007 - 0.074]    | 0.000 [0.000 - NaN]           | 0.001 [0.000 - 0.039]       | 0.001 [0.000 - 0.003]    | 0.002 [0.001 - 0.007]         |
| 2           | 0.003 [0.000 - 0.058]       | 0.017 [0.005 - 0.051]    | 0.000 [0.000 - NaN]           | 0.001 [0.000 - 0.021]       | 0.001 [0.000 - 0.003]    | 0.002 [0.001 - 0.007]         |
| 2.5         | 0.003 [0.000 - 0.046]       | 0.012 [0.004 - 0.036]    | 0.000 [0.000 - NaN]           | 0.001 [0.000 - 0.013]       | 0.001 [0.000 - 0.002]    | 0.002 [0.001 - 0.006]         |
| 3           | 0.003 [0.000 - 0.037]       | 0.009 [0.003 - 0.026]    | 0.000 [0.000 - NaN]           | 0.001 [0.000 - 0.009]       | 0.001 [0.000 - 0.002]    | 0.002 [0.001 - 0.006]         |
| 3.5         | 0.003 [0.000 - 0.030]       | 0.007 [0.002 - 0.020]    | 0.000 [0.000 - NaN]           | 0.002 [0.000 - 0.007]       | 0.001 [0.000 - 0.002]    | 0.002 [0.001 - 0.006]         |
| 4           | 0.003 [0.000 - 0.024]       | 0.005 [0.002 - 0.015]    | 0.000 [0.000 - NaN]           | 0.002 [0.000 - 0.007]       | 0.001 [0.000 - 0.002]    | 0.002 [0.001 - 0.005]         |
| 4.5         | 0.003 [0.001 - 0.020]       | 0.004 [0.001 - 0.012]    | 0.000 [0.000 - NaN]           | 0.002 [0.000 - 0.006]       | 0.001 [0.000 - 0.002]    | 0.003 [0.001 - 0.005]         |
| 5           | 0.003 [0.001 - 0.017]       | 0.003 [0.001 - 0.010]    | 0.000 [0.000 - NaN]           | 0.002 [0.001 - 0.006]       | 0.001 [0.000 - 0.001]    | 0.003 [0.001 - 0.005]         |
| Age         |                             | 30-34 yrs                |                               |                             | >34 yrs                  |                               |
| Weight gain | Normal weight<br>(n=12,302) | Underweight<br>(n=2,460) | Overweight/Obese<br>(n=4,749) | Normal weight<br>(n=5,750)  | Underweight<br>(n=704)   | Overweight/Obese<br>(n=3,221) |
| -5          | 0.000 [0.000 - 1.000]       | 0.006 [0.001 - 0.050]    | 0.002 [0.000 - 0.021]         | 0.038 [0.000 - 0.806]       | 0.016 [0.002 - 0.119]    | 0.000 [0.000 - NaN]           |
| -4.5        | 0.000 [0.000 - 1.000]       | 0.005 [0.001 - 0.041]    | 0.002 [0.000 - 0.019]         | 0.034 [0.000 - 0.745]       | 0.015 [0.002 - 0.097]    | 0.000 [0.000 - NaN]           |
| -4          | 0.000 [0.000 - 1.000]       | 0.005 [0.001 - 0.034]    | 0.002 [0.000 - 0.017]         | 0.030 [0.000 - 0.672]       | 0.013 [0.002 - 0.079]    | 0.000 [0.000 - NaN]           |
| -3.5        | 0.000 [0.000 - 1.000]       | 0.004 [0.001 - 0.028]    | 0.002 [0.000 - 0.015]         | 0.027 [0.001 - 0.591]       | 0.011 [0.002 - 0.063]    | 0.000 [0.000 - NaN]           |
| -3          | 0.000 [0.000 - 1.000]       | 0.004 [0.001 - 0.023]    | 0.002 [0.000 - 0.014]         | 0.024 [0.001 - 0.505]       | 0.010 [0.002 - 0.051]    | 0.000 [0.000 - NaN]           |
| -2.5        | 0.000 [0.000 - 1.000]       | 0.004 [0.001 - 0.019]    | 0.002 [0.000 - 0.012]         | 0.022 [0.001 - 0.419]       | 0.009 [0.002 - 0.041]    | 0.000 [0.000 - NaN]           |
| -2          | 0.000 [0.000 - 1.000]       | 0.003 [0.001 - 0.016]    | 0.002 [0.000 - 0.011]         | 0.020 [0.001 - 0.338]       | 0.008 [0.002 - 0.033]    | 0.000 [0.000 - NaN]           |
| -1.5        | 0.000 [0.000 - 1.000]       | 0.003 [0.001 - 0.013]    | 0.002 [0.000 - 0.010]         | 0.018 [0.001 - 0.266]       | 0.007 [0.002 - 0.027]    | 0.000 [0.000 - NaN]           |
| -1          | 0.000 [0.000 - 1.000]       | 0.003 [0.001 - 0.011]    | 0.002 [0.000 - 0.009]         | 0.016 [0.001 - 0.205]       | 0.006 [0.002 - 0.022]    | 0.000 [0.000 - NaN]           |
| -0.5        | 0.000 [0.000 - 1.000]       | 0.003 [0.001 - 0.009]    | 0.002 [0.000 - 0.008]         | 0.014 [0.001 - 0.155]       | 0.006 [0.002 - 0.017]    | 0.000 [0.000 - NaN]           |
| Mean        | 0.000 [0.000 - 1.000]       | 0.002 [0.001 - 0.008]    | 0.002 [0.001 - 0.007]         | 0.013 [0.001 - 0.117]       | 0.005 [0.002 - 0.014]    | 0.000 [0.000 - NaN]           |
| 0.5         | 0.000 [0.000 - 1.000]       | 0.002 [0.001 - 0.006]    | 0.002 [0.001 - 0.007]         | 0.011 [0.001 - 0.087]       | 0.004 [0.002 - 0.011]    | 0.000 [0.000 - NaN]           |
| 1           | 0.000 [0.000 - 1.000]       | 0.002 [0.001 - 0.005]    | 0.002 [0.001 - 0.006]         | 0.010 [0.002 - 0.065]       | 0.004 [0.002 - 0.009]    | 0.000 [0.000 - NaN]           |
| 1.5         | 0.000 [0.000 - 0.994]       | 0.002 [0.001 - 0.004]    | 0.002 [0.001 - 0.005]         | 0.009 [0.002 - 0.049]       | 0.004 [0.002 - 0.008]    | 0.000 [0.000 - NaN]           |
| 2           | 0.000 [0.000 - 0.916]       | 0.002 [0.001 - 0.004]    | 0.002 [0.001 - 0.005]         | 0.008 [0.002 - 0.037]       | 0.003 [0.002 - 0.006]    | 0.000 [0.000 - NaN]           |
| 2.5         | 0.000 [0.000 - 0.512]       | 0.002 [0.001 - 0.003]    | 0.002 [0.001 - 0.005]         | 0.007 [0.002 - 0.029]       | 0.003 [0.001 - 0.005]    | 0.000 [0.000 - NaN]           |
| 3           | 0.000 [0.000 - 0.136]       | 0.001 [0.001 - 0.003]    | 0.002 [0.001 - 0.004]         | 0.007 [0.002 - 0.023]       | 0.002 [0.001 - 0.005]    | 0.000 [0.000 - NaN]           |
| 3.5         | 0.000 [0.000 - 0.038]       | 0.001 [0.001 - 0.002]    | 0.002 [0.001 - 0.004]         | 0.006 [0.002 - 0.019]       | 0.002 [0.001 - 0.004]    | 0.000 [0.000 - NaN]           |
| 4           | 0.000 [0.000 - 0.017]       | 0.001 [0.001 - 0.002]    | 0.002 [0.001 - 0.004]         | 0.005 [0.002 - 0.016]       | 0.002 [0.001 - 0.004]    | 0.000 [0.000 - NaN]           |
| 4.5         | 0.001 [0.000 - 0.011]       | 0.001 [0.001 - 0.002]    | 0.002 [0.001 - 0.004]         | 0.005 [0.001 - 0.015]       | 0.002 [0.001 - 0.003]    | 0.000 [0.000 - NaN]           |
| 5           | 0.002 [0.000 - 0.011]       | 0.001 [0.001 - 0.002]    | 0.002 [0.001 - 0.004]         | 0.004 [0.001 - 0.014]       | 0.002 [0.001 - 0.003]    | 0.000 [0.000 - NaN]           |

## 2.6

### Macrosomia

| Age         |                             | <25 yrs                  |                               |                             | 25-29 yrs                |                               |
|-------------|-----------------------------|--------------------------|-------------------------------|-----------------------------|--------------------------|-------------------------------|
| Weight gain | Normal weight<br>(n=1,317)  | Underweight<br>(n=697)   | Overweight/Obese<br>(n=313)   | Normal weight<br>(n=12,390) | Underweight<br>(n=3,940) | Overweight/Obese<br>(n=3,236) |
| -5          | 0.003 [0.000 - 0.076]       | 0.004 [0.001 - 0.021]    | 0.075 [0.013 - 0.335]         | 0.001 [0.000 - 0.004]       | 0.007 [0.004 - 0.011]    | 0.026 [0.015 - 0.045]         |
| -4.5        | 0.003 [0.000 - 0.072]       | 0.005 [0.001 - 0.021]    | 0.075 [0.014 - 0.315]         | 0.001 [0.000 - 0.004]       | 0.007 [0.005 - 0.011]    | 0.028 [0.016 - 0.046]         |
| -4          | 0.003 [0.000 - 0.067]       | 0.005 [0.001 - 0.022]    | 0.075 [0.015 - 0.296]         | 0.001 [0.001 - 0.004]       | 0.008 [0.005 - 0.012]    | 0.029 [0.018 - 0.047]         |
| -3.5        | 0.004 [0.000 - 0.063]       | 0.005 [0.001 - 0.022]    | 0.075 [0.017 - 0.277]         | 0.002 [0.001 - 0.005]       | 0.008 [0.006 - 0.012]    | 0.030 [0.019 - 0.049]         |
| -3          | 0.004 [0.000 - 0.060]       | 0.006 [0.002 - 0.022]    | 0.075 [0.019 - 0.260]         | 0.002 [0.001 - 0.005]       | 0.009 [0.006 - 0.013]    | 0.032 [0.020 - 0.050]         |
| -2.5        | 0.004 [0.000 - 0.056]       | 0.007 [0.002 - 0.023]    | 0.076 [0.020 - 0.244]         | 0.002 [0.001 - 0.005]       | 0.010 [0.007 - 0.014]    | 0.034 [0.022 - 0.051]         |
| -2          | 0.004 [0.000 - 0.053]       | 0.007 [0.002 - 0.024]    | 0.076 [0.022 - 0.228]         | 0.002 [0.001 - 0.006]       | 0.010 [0.007 - 0.015]    | 0.035 [0.024 - 0.053]         |
| -1.5        | 0.004 [0.000 - 0.050]       | 0.008 [0.002 - 0.024]    | 0.076 [0.024 - 0.215]         | 0.003 [0.001 - 0.006]       | 0.011 [0.008 - 0.016]    | 0.037 [0.025 - 0.054]         |
| -1          | 0.005 [0.000 - 0.047]       | 0.009 [0.003 - 0.025]    | 0.076 [0.026 - 0.202]         | 0.003 [0.001 - 0.006]       | 0.012 [0.009 - 0.017]    | 0.039 [0.027 - 0.055]         |
| -0.5        | 0.005 [0.001 - 0.044]       | 0.009 [0.003 - 0.025]    | 0.076 [0.028 - 0.190]         | 0.003 [0.001 - 0.007]       | 0.013 [0.010 - 0.018]    | 0.041 [0.029 - 0.057]         |
| Mean        | 0.005 [0.001 - 0.041]       | 0.010 [0.004 - 0.026]    | 0.077 [0.030 - 0.179]         | 0.004 [0.002 - 0.007]       | 0.014 [0.011 - 0.019]    | 0.043 [0.031 - 0.058]         |
| 0.5         | 0.006 [0.001 - 0.039]       | 0.011 [0.005 - 0.027]    | 0.077 [0.033 - 0.169]         | 0.004 [0.002 - 0.008]       | 0.015 [0.012 - 0.020]    | 0.045 [0.034 - 0.060]         |
| 1           | 0.006 [0.001 - 0.037]       | 0.012 [0.005 - 0.028]    | 0.077 [0.035 - 0.161]         | 0.004 [0.002 - 0.008]       | 0.016 [0.013 - 0.021]    | 0.047 [0.036 - 0.062]         |
| 1.5         | 0.006 [0.001 - 0.035]       | 0.013 [0.006 - 0.029]    | 0.077 [0.037 - 0.153]         | 0.005 [0.003 - 0.009]       | 0.018 [0.014 - 0.022]    | 0.050 [0.039 - 0.063]         |
| 2           | 0.007 [0.001 - 0.033]       | 0.015 [0.007 - 0.030]    | 0.077 [0.040 - 0.146]         | 0.005 [0.003 - 0.010]       | 0.019 [0.016 - 0.023]    | 0.052 [0.041 - 0.065]         |
| 2.5         | 0.007 [0.002 - 0.031]       | 0.016 [0.008 - 0.031]    | 0.078 [0.042 - 0.139]         | 0.006 [0.004 - 0.010]       | 0.021 [0.017 - 0.025]    | 0.054 [0.044 - 0.067]         |
| 3           | 0.007 [0.002 - 0.030]       | 0.018 [0.010 - 0.032]    | 0.078 [0.044 - 0.134]         | 0.007 [0.004 - 0.011]       | 0.022 [0.019 - 0.026]    | 0.057 [0.047 - 0.069]         |
| 3.5         | 0.008 [0.002 - 0.028]       | 0.019 [0.011 - 0.033]    | 0.078 [0.046 - 0.130]         | 0.008 [0.005 - 0.012]       | 0.024 [0.020 - 0.028]    | 0.060 [0.050 - 0.071]         |
| 4           | 0.008 [0.003 - 0.027]       | 0.021 [0.013 - 0.035]    | 0.079 [0.048 - 0.126]         | 0.008 [0.006 - 0.013]       | 0.026 [0.022 - 0.030]    | 0.063 [0.054 - 0.073]         |
| 4.5         | 0.009 [0.003 - 0.026]       | 0.023 [0.014 - 0.036]    | 0.079 [0.050 - 0.123]         | 0.009 [0.006 - 0.014]       | 0.028 [0.024 - 0.031]    | 0.066 [0.057 - 0.076]         |
| 5           | 0.009 [0.004 - 0.025]       | 0.025 [0.016 - 0.038]    | 0.080 [0.052 - 0.122]         | 0.011 [0.007 - 0.015]       | 0.030 [0.026 - 0.033]    | 0.069 [0.060 - 0.079]         |
| Age         |                             | 30-34 yrs                |                               |                             | >34 yrs                  |                               |
| Weight gain | Normal weight<br>(n=12,281) | Underweight<br>(n=2,458) | Overweight/Obese<br>(n=4,738) | Normal weight<br>(n=5,735)  | Underweight<br>(n=703)   | Overweight/Obese<br>(n=3,211) |
| -5          | 0.000 [0.000 - 0.141]       | 0.007 [0.005 - 0.011]    | 0.016 [0.006 - 0.044]         | 0.001 [0.000 - 0.029]       | 0.012 [0.006 - 0.022]    | 0.013 [0.004 - 0.043]         |
| -4.5        | 0.000 [0.000 - 0.111]       | 0.008 [0.005 - 0.012]    | 0.017 [0.007 - 0.043]         | 0.001 [0.000 - 0.028]       | 0.012 [0.007 - 0.022]    | 0.014 [0.005 - 0.042]         |
| -4          | 0.000 [0.000 - 0.087]       | 0.008 [0.006 - 0.013]    | 0.019 [0.008 - 0.043]         | 0.001 [0.000 - 0.027]       | 0.013 [0.007 - 0.023]    | 0.016 [0.006 - 0.042]         |
| -3.5        | 0.000 [0.000 - 0.069]       | 0.009 [0.006 - 0.013]    | 0.020 [0.009 - 0.043]         | 0.001 [0.000 - 0.026]       | 0.014 [0.008 - 0.023]    | 0.017 [0.007 - 0.042]         |
| -3          | 0.000 [0.000 - 0.055]       | 0.010 [0.007 - 0.014]    | 0.022 [0.011 - 0.043]         | 0.001 [0.000 - 0.025]       | 0.015 [0.009 - 0.024]    | 0.019 [0.009 - 0.043]         |
| -2.5        | 0.000 [0.000 - 0.044]       | 0.011 [0.008 - 0.015]    | 0.024 [0.013 - 0.044]         | 0.001 [0.000 - 0.025]       | 0.015 [0.009 - 0.025]    | 0.021 [0.010 - 0.043]         |
| -2          | 0.001 [0.000 - 0.036]       | 0.012 [0.008 - 0.016]    | 0.026 [0.015 - 0.044]         | 0.001 [0.000 - 0.024]       | 0.016 [0.010 - 0.025]    | 0.024 [0.013 - 0.044]         |
| -1.5        | 0.001 [0.000 - 0.030]       | 0.013 [0.009 - 0.017]    | 0.028 [0.017 - 0.045]         | 0.001 [0.000 - 0.023]       | 0.017 [0.011 - 0.026]    | 0.026 [0.015 - 0.045]         |
| -1          | 0.001 [0.000 - 0.025]       | 0.014 [0.010 - 0.018]    | 0.030 [0.019 - 0.046]         | 0.002 [0.000 - 0.022]       | 0.018 [0.012 - 0.027]    | 0.029 [0.018 - 0.047]         |
| -0.5        | 0.001 [0.000 - 0.022]       | 0.015 [0.011 - 0.019]    | 0.032 [0.022 - 0.048]         | 0.002 [0.000 - 0.022]       | 0.019 [0.013 - 0.028]    | 0.032 [0.021 - 0.049]         |
| Mean        | 0.002 [0.000 - 0.019]       | 0.016 [0.012 - 0.020]    | 0.035 [0.025 - 0.049]         | 0.002 [0.000 - 0.021]       | 0.020 [0.014 - 0.028]    | 0.035 [0.024 - 0.051]         |
| 0.5         | 0.002 [0.000 - 0.018]       | 0.017 [0.014 - 0.022]    | 0.038 [0.028 - 0.051]         | 0.002 [0.000 - 0.020]       | 0.021 [0.015 - 0.029]    | 0.039 [0.028 - 0.053]         |
| 1           | 0.003 [0.000 - 0.016]       | 0.018 [0.015 - 0.023]    | 0.041 [0.032 - 0.053]         | 0.003 [0.000 - 0.020]       | 0.022 [0.017 - 0.030]    | 0.043 [0.032 - 0.056]         |
| 1.5         | 0.004 [0.001 - 0.016]       | 0.020 [0.016 - 0.024]    | 0.044 [0.035 - 0.055]         | 0.003 [0.000 - 0.019]       | 0.024 [0.018 - 0.031]    | 0.046 [0.036 - 0.059]         |
| 2           | 0.005 [0.001 - 0.016]       | 0.022 [0.018 - 0.026]    | 0.048 [0.039 - 0.058]         | 0.003 [0.001 - 0.019]       | 0.025 [0.019 - 0.032]    | 0.050 [0.040 - 0.063]         |
| 2.5         | 0.006 [0.002 - 0.016]       | 0.023 [0.020 - 0.028]    | 0.052 [0.043 - 0.062]         | 0.004 [0.001 - 0.019]       | 0.026 [0.021 - 0.033]    | 0.054 [0.044 - 0.066]         |
| 3           | 0.008 [0.003 - 0.017]       | 0.025 [0.022 - 0.029]    | 0.056 [0.047 - 0.065]         | 0.004 [0.001 - 0.018]       | 0.028 [0.023 - 0.034]    | 0.058 [0.048 - 0.070]         |
| 3.5         | 0.010 [0.005 - 0.019]       | 0.027 [0.024 - 0.031]    | 0.060 [0.052 - 0.069]         | 0.005 [0.001 - 0.018]       | 0.029 [0.024 - 0.035]    | 0.062 [0.052 - 0.074]         |
| 4           | 0.012 [0.007 - 0.021]       | 0.029 [0.026 - 0.033]    | 0.064 [0.056 - 0.073]         | 0.006 [0.002 - 0.018]       | 0.031 [0.026 - 0.036]    | 0.065 [0.055 - 0.077]         |
| 4.5         | 0.014 [0.009 - 0.023]       | 0.032 [0.028 - 0.035]    | 0.068 [0.060 - 0.078]         | 0.006 [0.002 - 0.018]       | 0.032 [0.028 - 0.038]    | 0.069 [0.058 - 0.081]         |
| 5           | 0.017 [0.011 - 0.026]       | 0.034 [0.031 - 0.038]    | 0.073 [0.064 - 0.083]         | 0.007 [0.003 - 0.019]       | 0.034 [0.030 - 0.039]    | 0.072 [0.061 - 0.085]         |

## 2.7

## Small for gestational age

| Age         |                             | <25 yrs                  |                               |                             | 25-29 yrs                |                               |
|-------------|-----------------------------|--------------------------|-------------------------------|-----------------------------|--------------------------|-------------------------------|
| Weight gain | Normal weight<br>(n=1,316)  | Underweight<br>(n=697)   | Overweight/Obese<br>(n=313)   | Normal weight<br>(n=12,386) | Underweight<br>(n=3,938) | Overweight/Obese<br>(n=3,236) |
| -5          | 0.089 [0.023 - 0.290]       | 0.205 [0.043 - 0.597]    | 0.093 [0.011 - 0.491]         | 0.257 [0.070 - 0.614]       | 0.080 [0.053 - 0.119]    | 0.026 [0.011 - 0.065]         |
| -4.5        | 0.088 [0.024 - 0.275]       | 0.190 [0.043 - 0.551]    | 0.089 [0.011 - 0.453]         | 0.240 [0.071 - 0.566]       | 0.077 [0.052 - 0.113]    | 0.026 [0.011 - 0.061]         |
| -4          | 0.087 [0.025 - 0.261]       | 0.177 [0.043 - 0.505]    | 0.084 [0.012 - 0.415]         | 0.224 [0.072 - 0.517]       | 0.074 [0.051 - 0.107]    | 0.026 [0.011 - 0.059]         |
| -3.5        | 0.086 [0.026 - 0.248]       | 0.164 [0.044 - 0.458]    | 0.080 [0.012 - 0.379]         | 0.208 [0.073 - 0.467]       | 0.072 [0.050 - 0.101]    | 0.026 [0.012 - 0.056]         |
| -3          | 0.085 [0.027 - 0.235]       | 0.152 [0.044 - 0.412]    | 0.076 [0.013 - 0.344]         | 0.193 [0.074 - 0.419]       | 0.069 [0.049 - 0.096]    | 0.025 [0.012 - 0.053]         |
| -2.5        | 0.084 [0.028 - 0.222]       | 0.141 [0.044 - 0.368]    | 0.073 [0.013 - 0.311]         | 0.179 [0.075 - 0.373]       | 0.066 [0.048 - 0.091]    | 0.025 [0.012 - 0.051]         |
| -2          | 0.083 [0.030 - 0.210]       | 0.130 [0.044 - 0.327]    | 0.069 [0.014 - 0.280]         | 0.166 [0.075 - 0.329]       | 0.064 [0.047 - 0.086]    | 0.025 [0.013 - 0.048]         |
| -1.5        | 0.082 [0.031 - 0.199]       | 0.120 [0.044 - 0.288]    | 0.066 [0.015 - 0.251]         | 0.154 [0.076 - 0.289]       | 0.061 [0.046 - 0.081]    | 0.025 [0.013 - 0.046]         |
| -1          | 0.081 [0.032 - 0.188]       | 0.111 [0.044 - 0.253]    | 0.063 [0.015 - 0.224]         | 0.142 [0.076 - 0.252]       | 0.059 [0.045 - 0.077]    | 0.024 [0.014 - 0.044]         |
| -0.5        | 0.080 [0.034 - 0.178]       | 0.103 [0.044 - 0.221]    | 0.060 [0.016 - 0.200]         | 0.132 [0.075 - 0.220]       | 0.057 [0.044 - 0.073]    | 0.024 [0.014 - 0.042]         |
| Mean        | 0.079 [0.035 - 0.168]       | 0.095 [0.044 - 0.193]    | 0.057 [0.016 - 0.177]         | 0.121 [0.074 - 0.192]       | 0.055 [0.043 - 0.069]    | 0.024 [0.014 - 0.040]         |
| 0.5         | 0.078 [0.036 - 0.159]       | 0.087 [0.043 - 0.169]    | 0.054 [0.017 - 0.158]         | 0.112 [0.073 - 0.168]       | 0.052 [0.042 - 0.065]    | 0.024 [0.015 - 0.038]         |
| 1           | 0.077 [0.038 - 0.150]       | 0.081 [0.042 - 0.147]    | 0.051 [0.018 - 0.140]         | 0.103 [0.071 - 0.147]       | 0.050 [0.041 - 0.062]    | 0.024 [0.015 - 0.036]         |
| 1.5         | 0.076 [0.039 - 0.141]       | 0.074 [0.042 - 0.129]    | 0.049 [0.018 - 0.125]         | 0.095 [0.069 - 0.130]       | 0.049 [0.040 - 0.058]    | 0.023 [0.016 - 0.035]         |
| 2           | 0.075 [0.041 - 0.134]       | 0.069 [0.041 - 0.113]    | 0.046 [0.019 - 0.111]         | 0.088 [0.066 - 0.115]       | 0.047 [0.039 - 0.055]    | 0.023 [0.016 - 0.033]         |
| 2.5         | 0.074 [0.042 - 0.126]       | 0.063 [0.039 - 0.100]    | 0.044 [0.019 - 0.099]         | 0.081 [0.063 - 0.102]       | 0.045 [0.038 - 0.052]    | 0.023 [0.016 - 0.032]         |
| 3           | 0.073 [0.044 - 0.119]       | 0.059 [0.038 - 0.089]    | 0.042 [0.019 - 0.089]         | 0.075 [0.060 - 0.092]       | 0.043 [0.037 - 0.049]    | 0.023 [0.017 - 0.031]         |
| 3.5         | 0.072 [0.045 - 0.113]       | 0.054 [0.037 - 0.080]    | 0.040 [0.019 - 0.081]         | 0.069 [0.057 - 0.083]       | 0.041 [0.037 - 0.047]    | 0.022 [0.017 - 0.030]         |
| 4           | 0.071 [0.047 - 0.107]       | 0.050 [0.035 - 0.072]    | 0.038 [0.019 - 0.074]         | 0.064 [0.054 - 0.076]       | 0.040 [0.035 - 0.045]    | 0.022 [0.017 - 0.029]         |
| 4.5         | 0.070 [0.048 - 0.102]       | 0.047 [0.034 - 0.065]    | 0.036 [0.019 - 0.069]         | 0.060 [0.051 - 0.071]       | 0.038 [0.034 - 0.042]    | 0.022 [0.017 - 0.028]         |
| 5           | 0.069 [0.049 - 0.098]       | 0.044 [0.032 - 0.060]    | 0.034 [0.018 - 0.064]         | 0.056 [0.048 - 0.066]       | 0.037 [0.033 - 0.041]    | 0.022 [0.017 - 0.028]         |
| Age         |                             | 30-34 yrs                |                               |                             | >34 yrs                  |                               |
| Weight gain | Normal weight<br>(n=12,275) | Underweight<br>(n=2,458) | Overweight/Obese<br>(n=4,735) | Normal weight<br>(n=5,730)  | Underweight<br>(n=703)   | Overweight/Obese<br>(n=3,208) |
| -5          | 0.369 [0.085 - 0.787]       | 0.084 [0.056 - 0.123]    | 0.025 [0.012 - 0.050]         | 0.112 [0.028 - 0.353]       | 0.037 [0.019 - 0.071]    | 0.007 [0.001 - 0.051]         |
| -4.5        | 0.339 [0.087 - 0.734]       | 0.080 [0.055 - 0.115]    | 0.025 [0.012 - 0.048]         | 0.108 [0.029 - 0.329]       | 0.037 [0.020 - 0.068]    | 0.007 [0.001 - 0.046]         |
| -4          | 0.310 [0.089 - 0.675]       | 0.076 [0.053 - 0.108]    | 0.024 [0.013 - 0.046]         | 0.104 [0.030 - 0.305]       | 0.036 [0.020 - 0.064]    | 0.008 [0.001 - 0.041]         |
| -3.5        | 0.282 [0.090 - 0.610]       | 0.073 [0.052 - 0.102]    | 0.024 [0.013 - 0.044]         | 0.101 [0.031 - 0.283]       | 0.035 [0.020 - 0.061]    | 0.008 [0.002 - 0.037]         |
| -3          | 0.256 [0.091 - 0.543]       | 0.070 [0.050 - 0.096]    | 0.024 [0.014 - 0.043]         | 0.098 [0.032 - 0.262]       | 0.035 [0.020 - 0.058]    | 0.009 [0.002 - 0.034]         |
| -2.5        | 0.232 [0.091 - 0.475]       | 0.067 [0.049 - 0.090]    | 0.024 [0.014 - 0.041]         | 0.094 [0.033 - 0.242]       | 0.034 [0.021 - 0.056]    | 0.010 [0.003 - 0.032]         |
| -2          | 0.209 [0.091 - 0.411]       | 0.064 [0.048 - 0.084]    | 0.024 [0.014 - 0.039]         | 0.091 [0.034 - 0.223]       | 0.033 [0.021 - 0.053]    | 0.011 [0.004 - 0.030]         |
| -1.5        | 0.188 [0.090 - 0.352]       | 0.061 [0.046 - 0.079]    | 0.024 [0.015 - 0.038]         | 0.088 [0.035 - 0.205]       | 0.033 [0.021 - 0.051]    | 0.011 [0.005 - 0.028]         |
| -1          | 0.168 [0.088 - 0.299]       | 0.058 [0.045 - 0.074]    | 0.023 [0.015 - 0.037]         | 0.085 [0.036 - 0.188]       | 0.032 [0.021 - 0.048]    | 0.012 [0.005 - 0.027]         |
| -0.5        | 0.151 [0.085 - 0.253]       | 0.055 [0.044 - 0.070]    | 0.023 [0.015 - 0.035]         | 0.082 [0.037 - 0.173]       | 0.032 [0.022 - 0.046]    | 0.013 [0.006 - 0.026]         |
| Mean        | 0.135 [0.081 - 0.214]       | 0.053 [0.042 - 0.066]    | 0.023 [0.016 - 0.034]         | 0.079 [0.038 - 0.159]       | 0.031 [0.022 - 0.044]    | 0.014 [0.008 - 0.026]         |
| 0.5         | 0.120 [0.078 - 0.182]       | 0.050 [0.041 - 0.062]    | 0.023 [0.016 - 0.033]         | 0.077 [0.039 - 0.145]       | 0.030 [0.022 - 0.042]    | 0.015 [0.009 - 0.025]         |
| 1           | 0.108 [0.073 - 0.155]       | 0.048 [0.040 - 0.058]    | 0.023 [0.017 - 0.032]         | 0.074 [0.040 - 0.133]       | 0.030 [0.022 - 0.040]    | 0.016 [0.010 - 0.025]         |
| 1.5         | 0.097 [0.069 - 0.134]       | 0.046 [0.039 - 0.054]    | 0.023 [0.017 - 0.031]         | 0.072 [0.041 - 0.122]       | 0.029 [0.022 - 0.038]    | 0.017 [0.011 - 0.026]         |
| 2           | 0.087 [0.065 - 0.116]       | 0.044 [0.038 - 0.051]    | 0.023 [0.017 - 0.030]         | 0.069 [0.042 - 0.112]       | 0.029 [0.022 - 0.037]    | 0.018 [0.012 - 0.026]         |
| 2.5         | 0.079 [0.061 - 0.103]       | 0.042 [0.036 - 0.048]    | 0.022 [0.018 - 0.029]         | 0.067 [0.042 - 0.104]       | 0.028 [0.023 - 0.035]    | 0.018 [0.013 - 0.026]         |
| 3           | 0.073 [0.057 - 0.092]       | 0.040 [0.035 - 0.045]    | 0.022 [0.018 - 0.028]         | 0.064 [0.043 - 0.096]       | 0.028 [0.023 - 0.034]    | 0.019 [0.013 - 0.027]         |
| 3.5         | 0.067 [0.053 - 0.084]       | 0.038 [0.034 - 0.043]    | 0.022 [0.018 - 0.027]         | 0.062 [0.043 - 0.089]       | 0.027 [0.022 - 0.033]    | 0.019 [0.014 - 0.027]         |
| 4           | 0.062 [0.050 - 0.077]       | 0.036 [0.033 - 0.040]    | 0.022 [0.018 - 0.027]         | 0.060 [0.043 - 0.084]       | 0.027 [0.022 - 0.032]    | 0.019 [0.014 - 0.027]         |
| 4.5         | 0.058 [0.047 - 0.071]       | 0.035 [0.031 - 0.038]    | 0.022 [0.018 - 0.027]         | 0.058 [0.042 - 0.079]       | 0.026 [0.022 - 0.031]    | 0.019 [0.014 - 0.027]         |
| 5           | 0.054 [0.044 - 0.067]       | 0.033 [0.030 - 0.036]    | 0.022 [0.018 - 0.027]         | 0.056 [0.041 - 0.076]       | 0.026 [0.022 - 0.030]    | 0.019 [0.014 - 0.027]         |

## 2.8

## Large for gestational age

| Age         |                             | <25 yrs                  |                               |                             | 25-29 yrs                |                               |
|-------------|-----------------------------|--------------------------|-------------------------------|-----------------------------|--------------------------|-------------------------------|
| Weight gain | Normal weight<br>(n=1,316)  | Underweight<br>(n=697)   | Overweight/Obese<br>(n=313)   | Normal weight<br>(n=12,386) | Underweight<br>(n=3,938) | Overweight/Obese<br>(n=3,236) |
| -5          | 0.067 [0.005 - 0.490]       | 0.245 [0.012 - 0.899]    | 0.268 [0.052 - 0.711]         | 0.021 [0.012 - 0.037]       | 0.080 [0.036 - 0.168]    | 0.123 [0.089 - 0.166]         |
| -4.5        | 0.066 [0.006 - 0.453]       | 0.239 [0.015 - 0.870]    | 0.262 [0.057 - 0.677]         | 0.022 [0.013 - 0.038]       | 0.081 [0.039 - 0.160]    | 0.126 [0.093 - 0.168]         |
| -4          | 0.066 [0.007 - 0.417]       | 0.234 [0.018 - 0.835]    | 0.256 [0.063 - 0.640]         | 0.024 [0.014 - 0.039]       | 0.081 [0.042 - 0.153]    | 0.129 [0.096 - 0.169]         |
| -3.5        | 0.066 [0.008 - 0.382]       | 0.228 [0.022 - 0.792]    | 0.250 [0.069 - 0.603]         | 0.025 [0.015 - 0.041]       | 0.082 [0.045 - 0.146]    | 0.132 [0.100 - 0.171]         |
| -3          | 0.065 [0.009 - 0.348]       | 0.223 [0.028 - 0.742]    | 0.245 [0.075 - 0.565]         | 0.026 [0.016 - 0.042]       | 0.083 [0.048 - 0.139]    | 0.135 [0.104 - 0.173]         |
| -2.5        | 0.065 [0.010 - 0.316]       | 0.217 [0.034 - 0.686]    | 0.239 [0.081 - 0.527]         | 0.028 [0.018 - 0.043]       | 0.084 [0.052 - 0.134]    | 0.138 [0.108 - 0.174]         |
| -2          | 0.064 [0.012 - 0.286]       | 0.212 [0.042 - 0.624]    | 0.233 [0.088 - 0.491]         | 0.029 [0.019 - 0.045]       | 0.085 [0.055 - 0.128]    | 0.141 [0.112 - 0.176]         |
| -1.5        | 0.064 [0.013 - 0.258]       | 0.207 [0.051 - 0.560]    | 0.228 [0.094 - 0.456]         | 0.031 [0.021 - 0.046]       | 0.086 [0.059 - 0.124]    | 0.144 [0.117 - 0.178]         |
| -1          | 0.064 [0.015 - 0.232]       | 0.202 [0.061 - 0.495]    | 0.222 [0.099 - 0.424]         | 0.033 [0.022 - 0.048]       | 0.087 [0.062 - 0.120]    | 0.148 [0.121 - 0.179]         |
| -0.5        | 0.063 [0.017 - 0.209]       | 0.196 [0.072 - 0.435]    | 0.216 [0.105 - 0.394]         | 0.035 [0.024 - 0.049]       | 0.088 [0.066 - 0.116]    | 0.151 [0.126 - 0.181]         |
| Mean        | 0.063 [0.019 - 0.188]       | 0.191 [0.083 - 0.381]    | 0.211 [0.110 - 0.366]         | 0.037 [0.026 - 0.051]       | 0.088 [0.069 - 0.113]    | 0.155 [0.130 - 0.183]         |
| 0.5         | 0.063 [0.022 - 0.169]       | 0.185 [0.092 - 0.335]    | 0.205 [0.114 - 0.341]         | 0.039 [0.028 - 0.053]       | 0.089 [0.072 - 0.110]    | 0.158 [0.135 - 0.185]         |
| 1           | 0.062 [0.024 - 0.153]       | 0.178 [0.100 - 0.297]    | 0.199 [0.117 - 0.319]         | 0.041 [0.031 - 0.055]       | 0.090 [0.075 - 0.108]    | 0.162 [0.140 - 0.187]         |
| 1.5         | 0.062 [0.026 - 0.139]       | 0.170 [0.104 - 0.264]    | 0.194 [0.119 - 0.299]         | 0.043 [0.033 - 0.057]       | 0.091 [0.078 - 0.106]    | 0.166 [0.145 - 0.189]         |
| 2           | 0.062 [0.029 - 0.127]       | 0.161 [0.106 - 0.235]    | 0.189 [0.121 - 0.282]         | 0.046 [0.036 - 0.058]       | 0.092 [0.081 - 0.105]    | 0.169 [0.150 - 0.191]         |
| 2.5         | 0.061 [0.031 - 0.117]       | 0.150 [0.105 - 0.210]    | 0.184 [0.122 - 0.266]         | 0.048 [0.038 - 0.061]       | 0.093 [0.083 - 0.105]    | 0.173 [0.155 - 0.193]         |
| 3           | 0.061 [0.034 - 0.108]       | 0.139 [0.101 - 0.189]    | 0.179 [0.123 - 0.254]         | 0.051 [0.041 - 0.063]       | 0.095 [0.085 - 0.104]    | 0.177 [0.160 - 0.196]         |
| 3.5         | 0.060 [0.036 - 0.101]       | 0.128 [0.095 - 0.170]    | 0.175 [0.123 - 0.243]         | 0.054 [0.044 - 0.065]       | 0.096 [0.088 - 0.105]    | 0.181 [0.165 - 0.198]         |
| 4           | 0.060 [0.037 - 0.095]       | 0.117 [0.089 - 0.153]    | 0.172 [0.123 - 0.235]         | 0.057 [0.048 - 0.067]       | 0.098 [0.090 - 0.106]    | 0.185 [0.170 - 0.201]         |
| 4.5         | 0.060 [0.039 - 0.090]       | 0.108 [0.083 - 0.140]    | 0.169 [0.122 - 0.228]         | 0.060 [0.051 - 0.070]       | 0.100 [0.093 - 0.108]    | 0.189 [0.175 - 0.205]         |
| 5           | 0.059 [0.040 - 0.087]       | 0.101 [0.078 - 0.129]    | 0.166 [0.122 - 0.223]         | 0.063 [0.055 - 0.073]       | 0.103 [0.096 - 0.111]    | 0.194 [0.180 - 0.208]         |
| Age         |                             | 30-34 yrs                |                               |                             | >34 yrs                  |                               |
| Weight gain | Normal weight<br>(n=12,275) | Underweight<br>(n=2,458) | Overweight/Obese<br>(n=4,735) | Normal weight<br>(n=5,730)  | Underweight<br>(n=703)   | Overweight/Obese<br>(n=3,208) |
| -5          | 0.021 [0.010 - 0.041]       | 0.052 [0.041 - 0.065]    | 0.103 [0.080 - 0.132]         | 0.024 [0.007 - 0.081]       | 0.096 [0.072 - 0.127]    | 0.133 [0.102 - 0.171]         |
| -4.5        | 0.022 [0.012 - 0.042]       | 0.054 [0.043 - 0.067]    | 0.107 [0.084 - 0.135]         | 0.026 [0.008 - 0.082]       | 0.098 [0.074 - 0.129]    | 0.137 [0.107 - 0.174]         |
| -4          | 0.024 [0.013 - 0.044]       | 0.056 [0.045 - 0.070]    | 0.111 [0.088 - 0.138]         | 0.028 [0.009 - 0.083]       | 0.100 [0.077 - 0.130]    | 0.142 [0.112 - 0.178]         |
| -3.5        | 0.025 [0.014 - 0.045]       | 0.059 [0.048 - 0.072]    | 0.115 [0.093 - 0.142]         | 0.030 [0.010 - 0.083]       | 0.103 [0.080 - 0.131]    | 0.146 [0.117 - 0.181]         |
| -3          | 0.027 [0.015 - 0.047]       | 0.061 [0.051 - 0.074]    | 0.119 [0.098 - 0.145]         | 0.032 [0.011 - 0.084]       | 0.105 [0.083 - 0.132]    | 0.151 [0.122 - 0.184]         |
| -2.5        | 0.029 [0.017 - 0.049]       | 0.064 [0.053 - 0.077]    | 0.124 [0.102 - 0.149]         | 0.034 [0.013 - 0.085]       | 0.107 [0.086 - 0.133]    | 0.155 [0.128 - 0.187]         |
| -2          | 0.031 [0.018 - 0.051]       | 0.067 [0.056 - 0.079]    | 0.129 [0.108 - 0.153]         | 0.036 [0.015 - 0.086]       | 0.110 [0.089 - 0.134]    | 0.160 [0.133 - 0.191]         |
| -1.5        | 0.033 [0.020 - 0.052]       | 0.070 [0.060 - 0.082]    | 0.133 [0.113 - 0.157]         | 0.038 [0.016 - 0.087]       | 0.112 [0.092 - 0.135]    | 0.165 [0.139 - 0.194]         |
| -1          | 0.035 [0.022 - 0.054]       | 0.073 [0.063 - 0.085]    | 0.138 [0.118 - 0.161]         | 0.041 [0.018 - 0.088]       | 0.115 [0.096 - 0.137]    | 0.170 [0.145 - 0.198]         |
| -0.5        | 0.037 [0.024 - 0.056]       | 0.076 [0.066 - 0.088]    | 0.143 [0.124 - 0.165]         | 0.044 [0.021 - 0.089]       | 0.117 [0.099 - 0.138]    | 0.175 [0.152 - 0.201]         |
| Mean        | 0.040 [0.027 - 0.059]       | 0.080 [0.070 - 0.091]    | 0.149 [0.130 - 0.169]         | 0.046 [0.023 - 0.090]       | 0.120 [0.102 - 0.139]    | 0.181 [0.158 - 0.205]         |
| 0.5         | 0.042 [0.029 - 0.061]       | 0.083 [0.074 - 0.094]    | 0.154 [0.136 - 0.173]         | 0.049 [0.026 - 0.091]       | 0.122 [0.106 - 0.140]    | 0.186 [0.165 - 0.209]         |
| 1           | 0.045 [0.032 - 0.063]       | 0.087 [0.078 - 0.097]    | 0.159 [0.143 - 0.178]         | 0.053 [0.029 - 0.092]       | 0.125 [0.110 - 0.142]    | 0.191 [0.172 - 0.213]         |
| 1.5         | 0.048 [0.035 - 0.065]       | 0.090 [0.082 - 0.100]    | 0.165 [0.149 - 0.182]         | 0.056 [0.033 - 0.094]       | 0.128 [0.113 - 0.143]    | 0.197 [0.178 - 0.217]         |
| 2           | 0.051 [0.039 - 0.068]       | 0.094 [0.086 - 0.103]    | 0.171 [0.156 - 0.187]         | 0.060 [0.037 - 0.095]       | 0.130 [0.117 - 0.145]    | 0.203 [0.185 - 0.222]         |
| 2.5         | 0.055 [0.042 - 0.071]       | 0.098 [0.090 - 0.107]    | 0.177 [0.163 - 0.192]         | 0.063 [0.041 - 0.097]       | 0.133 [0.121 - 0.146]    | 0.209 [0.192 - 0.227]         |
| 3           | 0.058 [0.046 - 0.073]       | 0.103 [0.095 - 0.110]    | 0.183 [0.170 - 0.197]         | 0.067 [0.046 - 0.099]       | 0.136 [0.125 - 0.148]    | 0.215 [0.199 - 0.232]         |
| 3.5         | 0.062 [0.050 - 0.076]       | 0.107 [0.100 - 0.114]    | 0.190 [0.177 - 0.203]         | 0.072 [0.050 - 0.101]       | 0.139 [0.128 - 0.150]    | 0.221 [0.206 - 0.237]         |
| 4           | 0.066 [0.054 - 0.080]       | 0.111 [0.105 - 0.118]    | 0.196 [0.184 - 0.209]         | 0.076 [0.056 - 0.104]       | 0.142 [0.132 - 0.152]    | 0.227 [0.213 - 0.243]         |
| 4.5         | 0.070 [0.059 - 0.083]       | 0.116 [0.110 - 0.123]    | 0.203 [0.191 - 0.215]         | 0.081 [0.061 - 0.107]       | 0.145 [0.135 - 0.155]    | 0.234 [0.219 - 0.250]         |
| 5           | 0.075 [0.064 - 0.087]       | 0.121 [0.115 - 0.127]    | 0.210 [0.198 - 0.222]         | 0.086 [0.066 - 0.111]       | 0.148 [0.139 - 0.158]    | 0.240 [0.225 - 0.257]         |



## 2.9

### All disease

| Age         |                             | <25 yrs                  |                               |                             | 25-29 yrs                |                               |
|-------------|-----------------------------|--------------------------|-------------------------------|-----------------------------|--------------------------|-------------------------------|
| Weight gain | Normal weight<br>(n=1,324)  | Underweight<br>(n=698)   | Overweight/Obese<br>(n=314)   | Normal weight<br>(n=12,406) | Underweight<br>(n=3,943) | Overweight/Obese<br>(n=3,249) |
| -5          | 0.726 [0.095 - 0.985]       | 0.842 [0.291 - 0.986]    | 0.967 [0.555 - 0.999]         | 0.870 [0.547 - 0.974]       | 0.870 [0.613 - 0.966]    | 0.975 [0.881 - 0.995]         |
| -4.5        | 0.705 [0.105 - 0.980]       | 0.821 [0.301 - 0.980]    | 0.960 [0.571 - 0.998]         | 0.849 [0.537 - 0.965]       | 0.856 [0.626 - 0.955]    | 0.969 [0.875 - 0.993]         |
| -4          | 0.683 [0.117 - 0.972]       | 0.799 [0.311 - 0.972]    | 0.952 [0.586 - 0.996]         | 0.825 [0.528 - 0.952]       | 0.842 [0.638 - 0.941]    | 0.960 [0.870 - 0.989]         |
| -3.5        | 0.660 [0.129 - 0.962]       | 0.774 [0.321 - 0.961]    | 0.941 [0.600 - 0.994]         | 0.798 [0.517 - 0.936]       | 0.826 [0.649 - 0.924]    | 0.950 [0.862 - 0.983]         |
| -3          | 0.636 [0.142 - 0.949]       | 0.747 [0.331 - 0.946]    | 0.929 [0.612 - 0.991]         | 0.768 [0.507 - 0.914]       | 0.808 [0.656 - 0.903]    | 0.937 [0.853 - 0.974]         |
| -2.5        | 0.612 [0.156 - 0.931]       | 0.718 [0.340 - 0.927]    | 0.914 [0.622 - 0.986]         | 0.734 [0.496 - 0.886]       | 0.789 [0.660 - 0.878]    | 0.921 [0.841 - 0.962]         |
| -2          | 0.587 [0.171 - 0.907]       | 0.688 [0.349 - 0.900]    | 0.897 [0.628 - 0.978]         | 0.698 [0.484 - 0.851]       | 0.768 [0.660 - 0.850]    | 0.900 [0.825 - 0.946]         |
| -1.5        | 0.561 [0.187 - 0.877]       | 0.655 [0.357 - 0.867]    | 0.877 [0.630 - 0.967]         | 0.660 [0.472 - 0.808]       | 0.746 [0.654 - 0.820]    | 0.875 [0.804 - 0.923]         |
| -1          | 0.535 [0.203 - 0.839]       | 0.621 [0.364 - 0.825]    | 0.853 [0.626 - 0.952]         | 0.619 [0.457 - 0.758]       | 0.720 [0.643 - 0.786]    | 0.845 [0.778 - 0.895]         |
| -0.5        | 0.509 [0.219 - 0.793]       | 0.586 [0.368 - 0.776]    | 0.825 [0.618 - 0.932]         | 0.577 [0.441 - 0.702]       | 0.691 [0.627 - 0.749]    | 0.810 [0.747 - 0.861]         |
| Mean        | 0.483 [0.235 - 0.740]       | 0.551 [0.368 - 0.721]    | 0.794 [0.606 - 0.906]         | 0.534 [0.422 - 0.643]       | 0.658 [0.605 - 0.708]    | 0.770 [0.711 - 0.820]         |
| 0.5         | 0.457 [0.248 - 0.683]       | 0.515 [0.364 - 0.663]    | 0.759 [0.588 - 0.874]         | 0.492 [0.400 - 0.584]       | 0.621 [0.576 - 0.664]    | 0.726 [0.671 - 0.775]         |
| 1           | 0.431 [0.257 - 0.623]       | 0.479 [0.355 - 0.606]    | 0.721 [0.567 - 0.836]         | 0.451 [0.377 - 0.527]       | 0.578 [0.540 - 0.616]    | 0.680 [0.630 - 0.727]         |
| 1.5         | 0.404 [0.261 - 0.566]       | 0.445 [0.343 - 0.551]    | 0.681 [0.541 - 0.794]         | 0.412 [0.353 - 0.473]       | 0.531 [0.498 - 0.564]    | 0.634 [0.588 - 0.678]         |
| 2           | 0.377 [0.260 - 0.511]       | 0.412 [0.329 - 0.500]    | 0.639 [0.513 - 0.748]         | 0.375 [0.328 - 0.424]       | 0.482 [0.453 - 0.510]    | 0.590 [0.549 - 0.630]         |
| 2.5         | 0.350 [0.254 - 0.460]       | 0.381 [0.313 - 0.455]    | 0.596 [0.482 - 0.701]         | 0.342 [0.304 - 0.381]       | 0.432 [0.407 - 0.456]    | 0.548 [0.511 - 0.585]         |
| 3           | 0.323 [0.243 - 0.413]       | 0.353 [0.295 - 0.416]    | 0.553 [0.449 - 0.653]         | 0.311 [0.280 - 0.345]       | 0.385 [0.364 - 0.406]    | 0.511 [0.477 - 0.545]         |
| 3.5         | 0.296 [0.230 - 0.372]       | 0.328 [0.277 - 0.382]    | 0.511 [0.414 - 0.606]         | 0.285 [0.259 - 0.313]       | 0.343 [0.325 - 0.362]    | 0.479 [0.448 - 0.510]         |
| 4           | 0.271 [0.215 - 0.336]       | 0.304 [0.260 - 0.353]    | 0.470 [0.380 - 0.561]         | 0.263 [0.240 - 0.288]       | 0.310 [0.293 - 0.326]    | 0.451 [0.422 - 0.481]         |
| 4.5         | 0.247 [0.198 - 0.304]       | 0.283 [0.243 - 0.327]    | 0.432 [0.349 - 0.519]         | 0.246 [0.225 - 0.268]       | 0.284 [0.270 - 0.299]    | 0.430 [0.402 - 0.458]         |
| 5           | 0.226 [0.181 - 0.277]       | 0.264 [0.227 - 0.305]    | 0.399 [0.321 - 0.482]         | 0.233 [0.213 - 0.254]       | 0.266 [0.252 - 0.280]    | 0.414 [0.386 - 0.442]         |
| Age         |                             | 30-34 yrs                |                               |                             | >34 yrs                  |                               |
| Weight gain | Normal weight<br>(n=12,302) | Underweight<br>(n=2,460) | Overweight/Obese<br>(n=5,749) | Normal weight<br>(n=5,750)  | Underweight<br>(n=704)   | Overweight/Obese<br>(n=3,221) |
| -5          | 0.978 [0.772 - 0.998]       | 0.956 [0.829 - 0.990]    | 0.974 [0.897 - 0.994]         | 0.975 [0.613 - 0.999]       | 0.946 [0.800 - 0.987]    | 0.930 [0.816 - 0.975]         |
| -4.5        | 0.971 [0.765 - 0.997]       | 0.949 [0.835 - 0.986]    | 0.968 [0.895 - 0.991]         | 0.968 [0.620 - 0.998]       | 0.940 [0.812 - 0.983]    | 0.924 [0.825 - 0.969]         |
| -4          | 0.962 [0.758 - 0.995]       | 0.941 [0.839 - 0.980]    | 0.960 [0.892 - 0.986]         | 0.959 [0.627 - 0.997]       | 0.933 [0.819 - 0.977]    | 0.918 [0.832 - 0.962]         |
| -3.5        | 0.950 [0.750 - 0.992]       | 0.932 [0.841 - 0.972]    | 0.951 [0.887 - 0.980]         | 0.948 [0.632 - 0.995]       | 0.924 [0.824 - 0.969]    | 0.912 [0.836 - 0.954]         |
| -3          | 0.934 [0.741 - 0.986]       | 0.920 [0.840 - 0.962]    | 0.941 [0.881 - 0.971]         | 0.934 [0.637 - 0.991]       | 0.914 [0.825 - 0.960]    | 0.904 [0.838 - 0.945]         |
| -2.5        | 0.915 [0.729 - 0.977]       | 0.907 [0.836 - 0.949]    | 0.928 [0.872 - 0.960]         | 0.916 [0.640 - 0.985]       | 0.902 [0.822 - 0.948]    | 0.895 [0.838 - 0.934]         |
| -2          | 0.890 [0.714 - 0.963]       | 0.891 [0.828 - 0.932]    | 0.912 [0.860 - 0.946]         | 0.894 [0.640 - 0.976]       | 0.887 [0.816 - 0.932]    | 0.885 [0.834 - 0.921]         |
| -1.5        | 0.859 [0.695 - 0.942]       | 0.871 [0.816 - 0.912]    | 0.893 [0.845 - 0.927]         | 0.867 [0.637 - 0.961]       | 0.868 [0.806 - 0.913]    | 0.872 [0.827 - 0.907]         |
| -1          | 0.821 [0.671 - 0.912]       | 0.846 [0.797 - 0.885]    | 0.870 [0.826 - 0.904]         | 0.835 [0.627 - 0.938]       | 0.846 [0.791 - 0.889]    | 0.857 [0.816 - 0.891]         |
| -0.5        | 0.776 [0.642 - 0.870]       | 0.816 [0.773 - 0.853]    | 0.842 [0.801 - 0.876]         | 0.797 [0.612 - 0.907]       | 0.820 [0.771 - 0.861]    | 0.839 [0.801 - 0.871]         |
| Mean        | 0.725 [0.609 - 0.817]       | 0.779 [0.742 - 0.813]    | 0.807 [0.769 - 0.841]         | 0.754 [0.592 - 0.866]       | 0.789 [0.745 - 0.827]    | 0.816 [0.781 - 0.847]         |
| 0.5         | 0.669 [0.571 - 0.754]       | 0.735 [0.702 - 0.767]    | 0.767 [0.730 - 0.799]         | 0.705 [0.566 - 0.815]       | 0.753 [0.714 - 0.789]    | 0.790 [0.756 - 0.820]         |
| 1           | 0.611 [0.531 - 0.685]       | 0.684 [0.653 - 0.714]    | 0.720 [0.686 - 0.752]         | 0.655 [0.536 - 0.757]       | 0.712 [0.676 - 0.745]    | 0.759 [0.726 - 0.789]         |
| 1.5         | 0.554 [0.488 - 0.618]       | 0.628 [0.600 - 0.655]    | 0.670 [0.639 - 0.701]         | 0.604 [0.504 - 0.696]       | 0.665 [0.633 - 0.696]    | 0.724 [0.692 - 0.754]         |
| 2           | 0.501 [0.446 - 0.556]       | 0.568 [0.543 - 0.593]    | 0.621 [0.591 - 0.650]         | 0.555 [0.469 - 0.637]       | 0.615 [0.586 - 0.644]    | 0.687 [0.656 - 0.716]         |
| 2.5         | 0.454 [0.407 - 0.501]       | 0.509 [0.487 - 0.531]    | 0.575 [0.547 - 0.603]         | 0.508 [0.434 - 0.581]       | 0.563 [0.536 - 0.590]    | 0.650 [0.619 - 0.679]         |
| 3           | 0.413 [0.372 - 0.454]       | 0.454 [0.435 - 0.473]    | 0.535 [0.508 - 0.561]         | 0.463 [0.398 - 0.529]       | 0.512 [0.486 - 0.537]    | 0.614 [0.584 - 0.643]         |
| 3.5         | 0.377 [0.341 - 0.414]       | 0.405 [0.388 - 0.423]    | 0.501 [0.475 - 0.526]         | 0.422 [0.364 - 0.482]       | 0.465 [0.441 - 0.489]    | 0.581 [0.552 - 0.609]         |
| 4           | 0.346 [0.314 - 0.380]       | 0.365 [0.350 - 0.381]    | 0.472 [0.447 - 0.496]         | 0.386 [0.332 - 0.442]       | 0.425 [0.403 - 0.448]    | 0.552 [0.523 - 0.580]         |
| 4.5         | 0.319 [0.290 - 0.349]       | 0.334 [0.320 - 0.349]    | 0.447 [0.423 - 0.472]         | 0.356 [0.306 - 0.409]       | 0.394 [0.373 - 0.416]    | 0.527 [0.498 - 0.555]         |
| 5           | 0.295 [0.268 - 0.324]       | 0.312 [0.298 - 0.326]    | 0.428 [0.404 - 0.452]         | 0.334 [0.286 - 0.385]       | 0.370 [0.350 - 0.391]    | 0.506 [0.477 - 0.535]         |

### 3. Evaluation of weight gain between pre and 34 weeks after pregnancy

- Generalized additive model (GAM) was used for predictive model of each disease.
- The above statistical model was applied to subsets of each age and BMI (ASIA).
- Reference weight gain = 5kg (Mean weight gain of mothers without any disease).

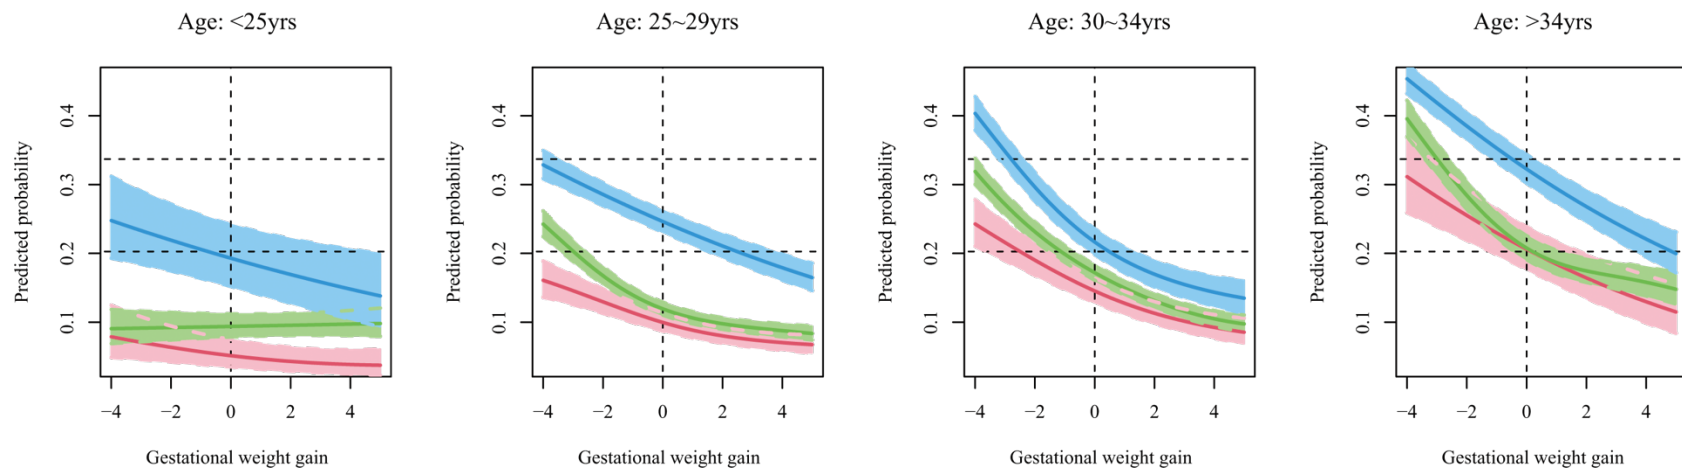

(a) **Gestational diabetes mellitus** (Red: Normal weight, Green: Underweight, Blue: Overweight/obese)

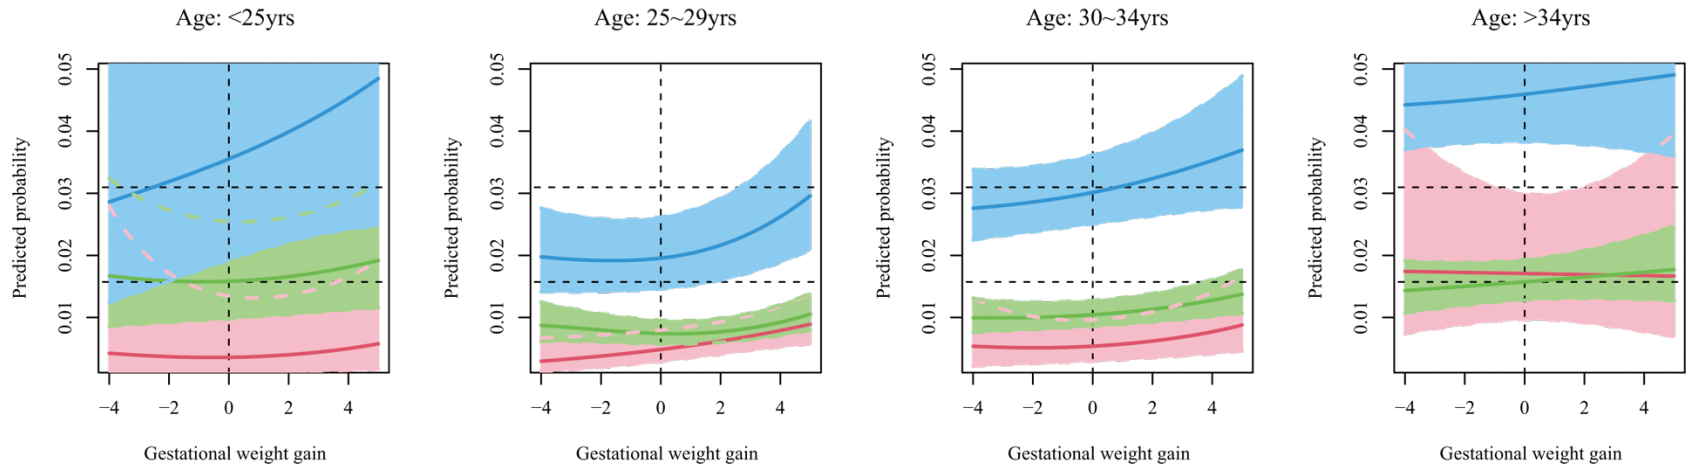

(b) **Preeclampsia** (Red: Normal weight, Green: Underweight, Blue: Overweight/obese)

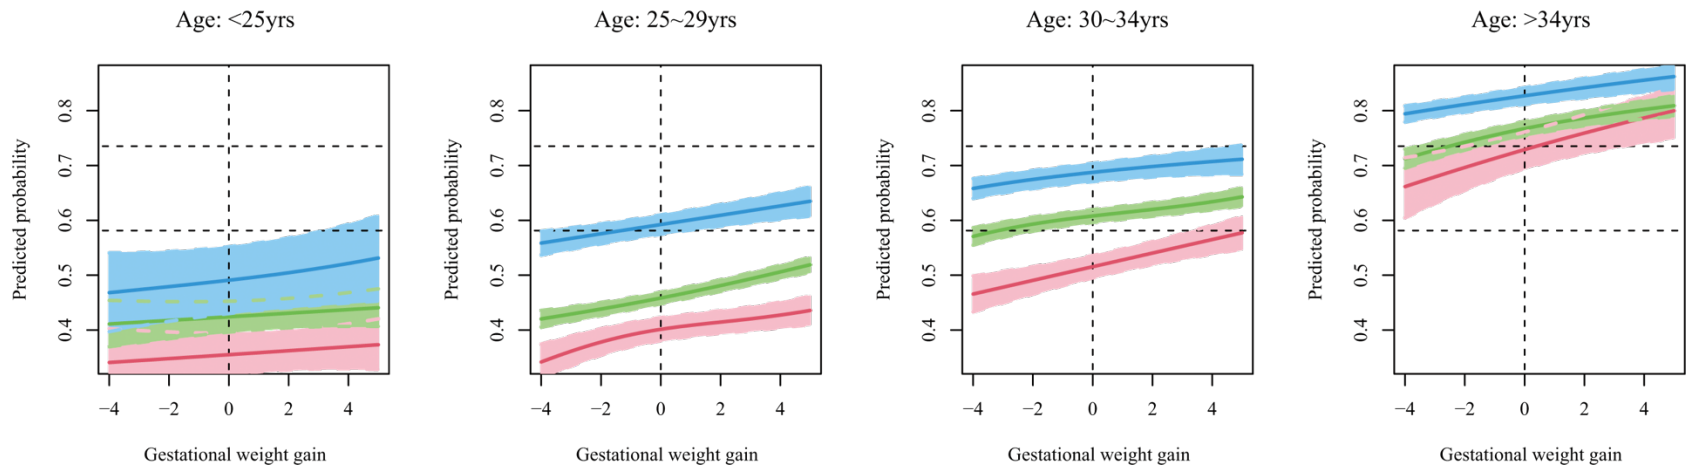

(c) **Cesarean delivery** (Red: Normal weight, Green: Underweight, Blue: Overweight/obese)

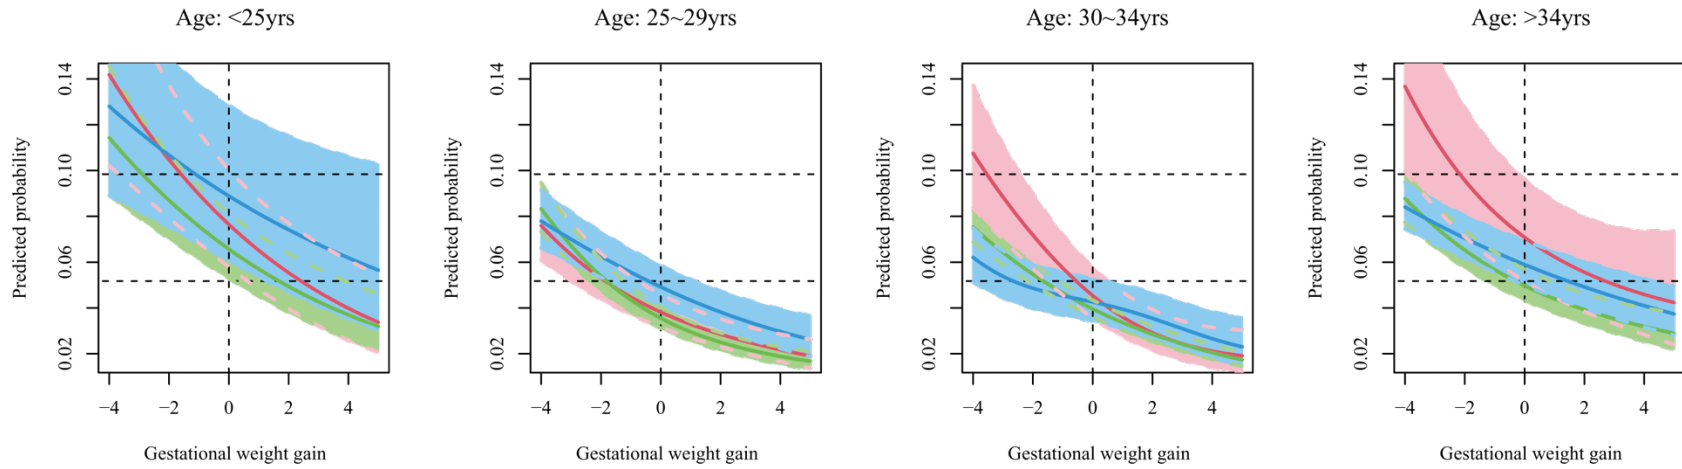

(d) **Preterm delivery** (Red: Normal weight, Green: Underweight, Blue: Overweight/obese)

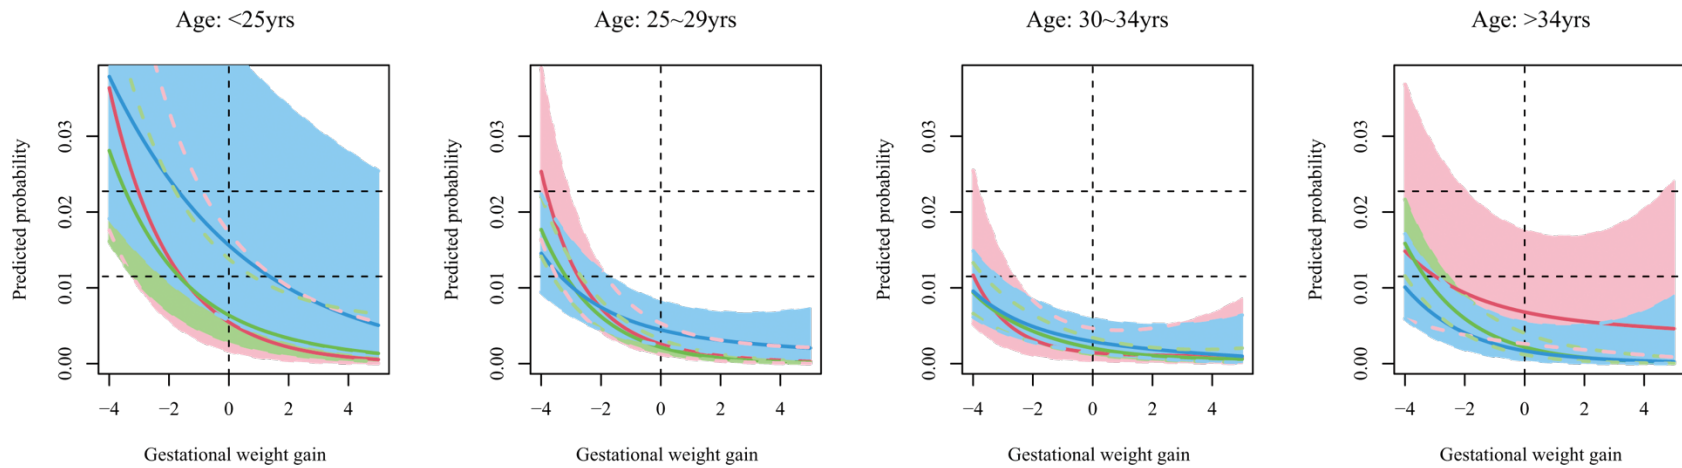

(e) **Stillbirth** (Red: Normal weight, Green: Underweight, Blue: Overweight/obese)

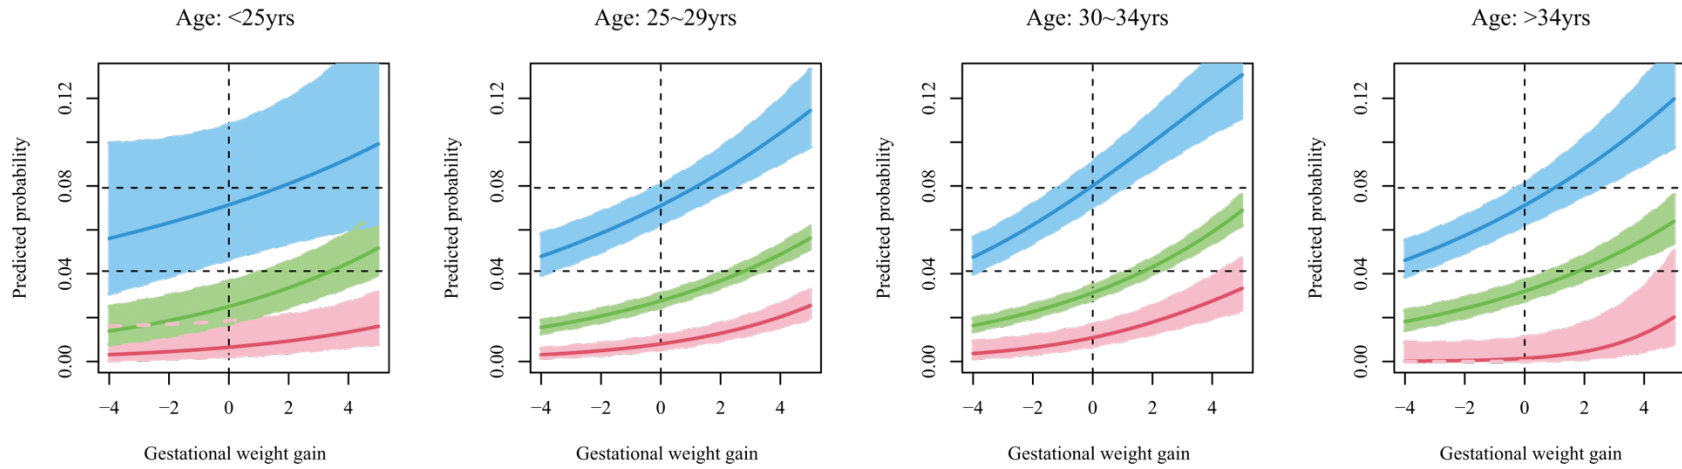

(f) **Macrosomia** (Red: Normal weight, Green: Underweight, Blue: Overweight/obese)

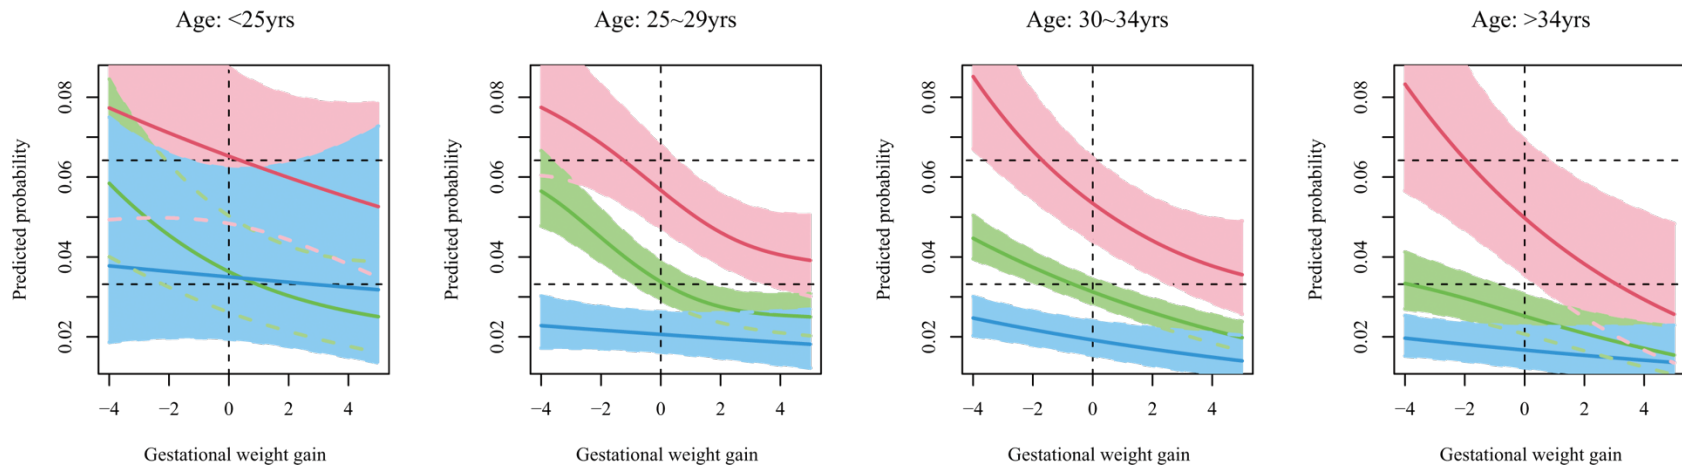

(g) **Small for gestational age** (Red: Normal weight, Green: Underweight, Blue: Overweight/obese)

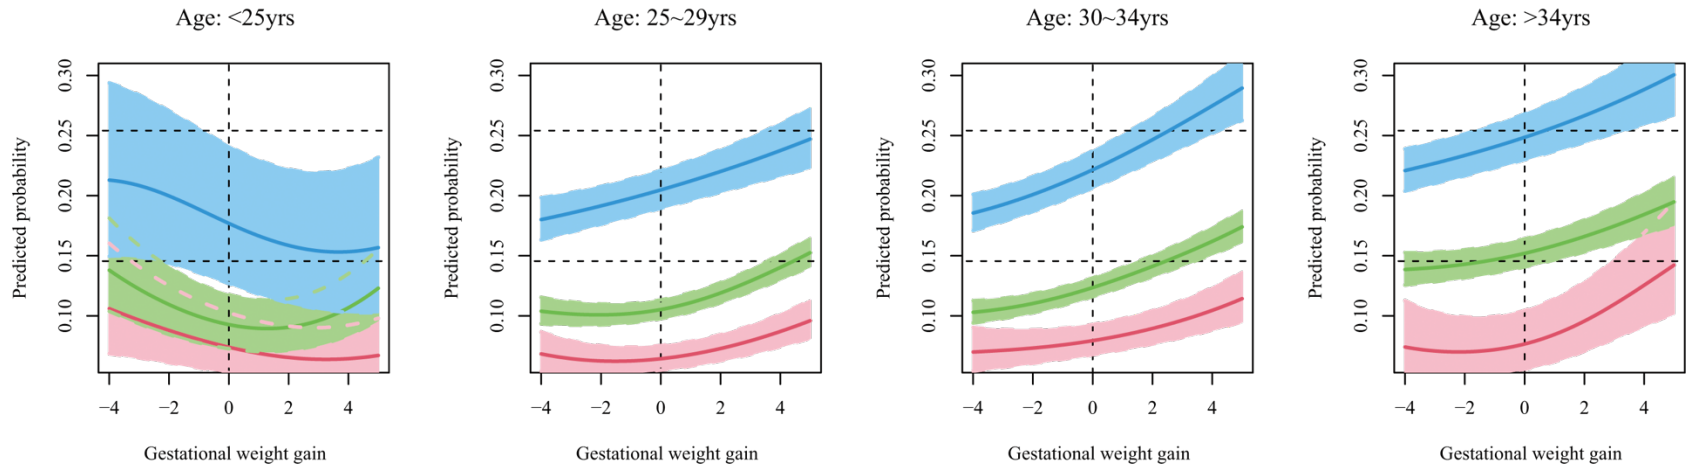

(h) **Large for gestational age** (Red: Normal weight, Green: Underweight, Blue: Overweight/obese)

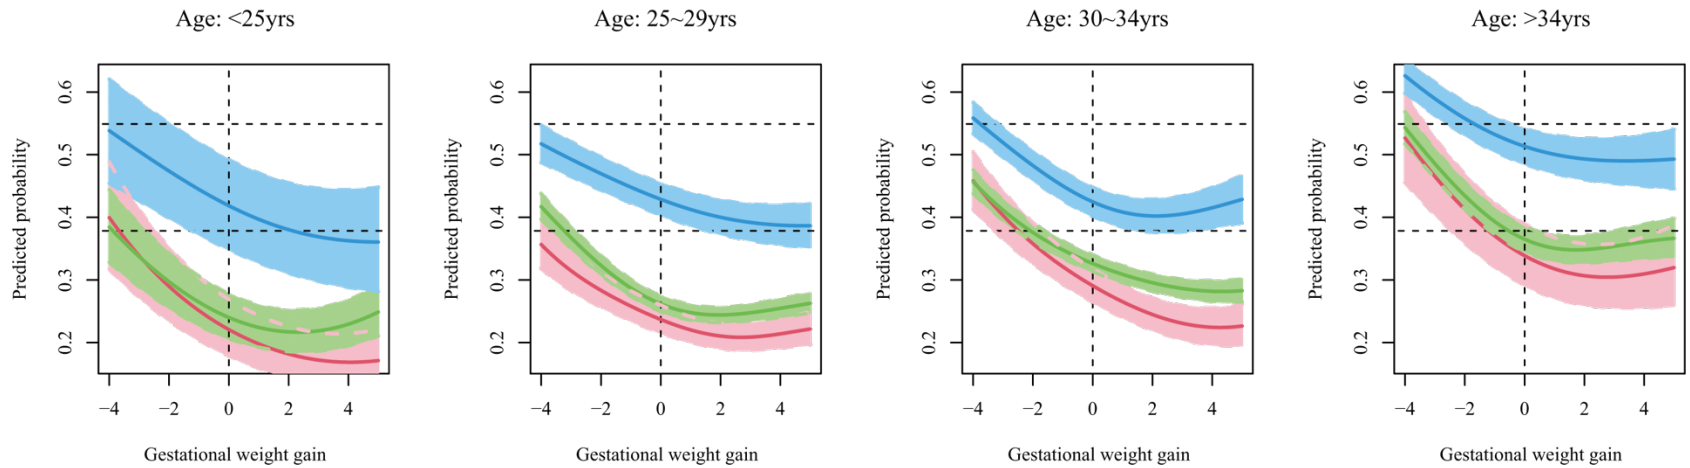

(i) **All disease** (Red: Normal weight, Green: Underweight, Blue: Overweight/obese)

### 3.1

## Gestational diabetes mellitus

| Age         |                             | <25 yrs                  |                               |                             | 25-29 yrs                |                               |
|-------------|-----------------------------|--------------------------|-------------------------------|-----------------------------|--------------------------|-------------------------------|
| Weight gain | Normal weight<br>(n=1,324)  | Underweight<br>(n=698)   | Overweight/Obese<br>(n=314)   | Normal weight<br>(n=12,406) | Underweight<br>(n=3,943) | Overweight/Obese<br>(n=3,249) |
| -5          | 0.086 [0.051 - 0.141]       | 0.090 [0.066 - 0.121]    | 0.263 [0.201 - 0.336]         | 0.174 [0.144 - 0.209]       | 0.279 [0.256 - 0.304]    | 0.351 [0.328 - 0.375]         |
| -4.5        | 0.082 [0.050 - 0.131]       | 0.090 [0.067 - 0.120]    | 0.255 [0.197 - 0.324]         | 0.167 [0.141 - 0.198]       | 0.262 [0.241 - 0.283]    | 0.340 [0.318 - 0.362]         |
| -4          | 0.078 [0.049 - 0.122]       | 0.091 [0.069 - 0.118]    | 0.248 [0.193 - 0.312]         | 0.160 [0.136 - 0.188]       | 0.242 [0.224 - 0.262]    | 0.328 [0.308 - 0.349]         |
| -3.5        | 0.074 [0.047 - 0.114]       | 0.091 [0.070 - 0.117]    | 0.240 [0.189 - 0.301]         | 0.153 [0.131 - 0.178]       | 0.223 [0.206 - 0.240]    | 0.317 [0.299 - 0.337]         |
| -3          | 0.070 [0.046 - 0.106]       | 0.091 [0.072 - 0.116]    | 0.233 [0.184 - 0.290]         | 0.145 [0.125 - 0.168]       | 0.203 [0.188 - 0.219]    | 0.307 [0.289 - 0.325]         |
| -2.5        | 0.067 [0.044 - 0.099]       | 0.092 [0.073 - 0.115]    | 0.226 [0.180 - 0.280]         | 0.137 [0.119 - 0.158]       | 0.185 [0.171 - 0.199]    | 0.296 [0.279 - 0.313]         |
| -2          | 0.064 [0.043 - 0.093]       | 0.092 [0.074 - 0.114]    | 0.219 [0.174 - 0.271]         | 0.129 [0.113 - 0.148]       | 0.168 [0.155 - 0.181]    | 0.286 [0.270 - 0.302]         |
| -1.5        | 0.060 [0.041 - 0.088]       | 0.093 [0.075 - 0.113]    | 0.212 [0.169 - 0.263]         | 0.121 [0.106 - 0.138]       | 0.152 [0.141 - 0.164]    | 0.275 [0.260 - 0.292]         |
| -1          | 0.057 [0.039 - 0.083]       | 0.093 [0.076 - 0.113]    | 0.206 [0.164 - 0.255]         | 0.114 [0.100 - 0.129]       | 0.139 [0.129 - 0.150]    | 0.265 [0.250 - 0.281]         |
| -0.5        | 0.055 [0.038 - 0.079]       | 0.093 [0.078 - 0.112]    | 0.199 [0.158 - 0.248]         | 0.106 [0.093 - 0.121]       | 0.128 [0.119 - 0.138]    | 0.256 [0.241 - 0.272]         |
| Mean        | 0.052 [0.036 - 0.075]       | 0.094 [0.078 - 0.112]    | 0.193 [0.152 - 0.242]         | 0.100 [0.087 - 0.114]       | 0.119 [0.110 - 0.129]    | 0.246 [0.231 - 0.262]         |
| 0.5         | 0.050 [0.035 - 0.072]       | 0.094 [0.079 - 0.112]    | 0.187 [0.146 - 0.236]         | 0.094 [0.082 - 0.107]       | 0.112 [0.103 - 0.122]    | 0.237 [0.222 - 0.253]         |
| 1           | 0.048 [0.033 - 0.069]       | 0.095 [0.080 - 0.112]    | 0.181 [0.140 - 0.231]         | 0.089 [0.078 - 0.101]       | 0.106 [0.098 - 0.115]    | 0.228 [0.212 - 0.245]         |
| 1.5         | 0.046 [0.032 - 0.066]       | 0.095 [0.080 - 0.112]    | 0.175 [0.134 - 0.226]         | 0.084 [0.073 - 0.096]       | 0.101 [0.093 - 0.110]    | 0.219 [0.203 - 0.236]         |
| 2           | 0.044 [0.030 - 0.064]       | 0.096 [0.081 - 0.113]    | 0.169 [0.128 - 0.221]         | 0.080 [0.070 - 0.092]       | 0.098 [0.090 - 0.107]    | 0.211 [0.194 - 0.228]         |
| 2.5         | 0.043 [0.029 - 0.063]       | 0.096 [0.081 - 0.113]    | 0.164 [0.122 - 0.217]         | 0.077 [0.067 - 0.089]       | 0.095 [0.086 - 0.104]    | 0.203 [0.186 - 0.221]         |
| 3           | 0.041 [0.028 - 0.062]       | 0.096 [0.081 - 0.114]    | 0.158 [0.116 - 0.213]         | 0.075 [0.064 - 0.087]       | 0.092 [0.084 - 0.101]    | 0.195 [0.177 - 0.213]         |
| 3.5         | 0.040 [0.026 - 0.061]       | 0.097 [0.081 - 0.116]    | 0.153 [0.110 - 0.209]         | 0.072 [0.062 - 0.085]       | 0.090 [0.081 - 0.099]    | 0.187 [0.169 - 0.206]         |
| 4           | 0.039 [0.025 - 0.060]       | 0.097 [0.080 - 0.117]    | 0.148 [0.104 - 0.206]         | 0.070 [0.059 - 0.083]       | 0.088 [0.079 - 0.098]    | 0.179 [0.161 - 0.199]         |
| 4.5         | 0.038 [0.024 - 0.061]       | 0.098 [0.080 - 0.119]    | 0.143 [0.099 - 0.203]         | 0.069 [0.057 - 0.082]       | 0.086 [0.076 - 0.096]    | 0.172 [0.154 - 0.192]         |
| 5           | 0.038 [0.023 - 0.061]       | 0.098 [0.079 - 0.121]    | 0.138 [0.093 - 0.200]         | 0.067 [0.056 - 0.082]       | 0.084 [0.074 - 0.094]    | 0.165 [0.146 - 0.186]         |
| Age         |                             | 30-34 yrs                |                               |                             | >34 yrs                  |                               |
| Weight gain | Normal weight<br>(n=12,302) | Underweight<br>(n=2,460) | Overweight/Obese<br>(n=4,749) | Normal weight<br>(n=5,750)  | Underweight<br>(n=704)   | Overweight/Obese<br>(n=3,221) |
| -5          | 0.269 [0.230 - 0.313]       | 0.371 [0.348 - 0.395]    | 0.456 [0.429 - 0.483]         | 0.342 [0.279 - 0.411]       | 0.453 [0.422 - 0.484]    | 0.491 [0.467 - 0.515]         |
| -4.5        | 0.256 [0.220 - 0.295]       | 0.345 [0.324 - 0.366]    | 0.430 [0.405 - 0.456]         | 0.327 [0.269 - 0.390]       | 0.425 [0.396 - 0.454]    | 0.473 [0.449 - 0.496]         |
| -4          | 0.242 [0.210 - 0.277]       | 0.319 [0.300 - 0.338]    | 0.403 [0.379 - 0.428]         | 0.311 [0.259 - 0.369]       | 0.396 [0.369 - 0.422]    | 0.454 [0.432 - 0.477]         |
| -3.5        | 0.229 [0.200 - 0.260]       | 0.294 [0.277 - 0.312]    | 0.376 [0.353 - 0.399]         | 0.297 [0.249 - 0.349]       | 0.366 [0.342 - 0.391]    | 0.436 [0.414 - 0.458]         |
| -3          | 0.215 [0.189 - 0.244]       | 0.271 [0.256 - 0.287]    | 0.348 [0.326 - 0.371]         | 0.282 [0.239 - 0.330]       | 0.337 [0.315 - 0.361]    | 0.418 [0.396 - 0.440]         |
| -2.5        | 0.202 [0.179 - 0.228]       | 0.250 [0.236 - 0.266]    | 0.322 [0.301 - 0.343]         | 0.269 [0.229 - 0.312]       | 0.310 [0.289 - 0.332]    | 0.400 [0.379 - 0.422]         |
| -2          | 0.190 [0.168 - 0.214]       | 0.231 [0.218 - 0.246]    | 0.296 [0.276 - 0.318]         | 0.255 [0.219 - 0.295]       | 0.284 [0.264 - 0.305]    | 0.383 [0.362 - 0.405]         |
| -1.5        | 0.178 [0.158 - 0.200]       | 0.214 [0.202 - 0.228]    | 0.273 [0.253 - 0.294]         | 0.242 [0.209 - 0.279]       | 0.261 [0.242 - 0.281]    | 0.367 [0.346 - 0.388]         |
| -1          | 0.166 [0.148 - 0.187]       | 0.199 [0.187 - 0.211]    | 0.252 [0.233 - 0.272]         | 0.230 [0.198 - 0.264]       | 0.240 [0.222 - 0.259]    | 0.351 [0.330 - 0.372]         |
| -0.5        | 0.156 [0.138 - 0.175]       | 0.185 [0.174 - 0.197]    | 0.233 [0.215 - 0.253]         | 0.218 [0.188 - 0.251]       | 0.222 [0.205 - 0.241]    | 0.335 [0.314 - 0.357]         |
| Mean        | 0.146 [0.129 - 0.164]       | 0.172 [0.161 - 0.184]    | 0.217 [0.199 - 0.236]         | 0.206 [0.177 - 0.239]       | 0.208 [0.191 - 0.226]    | 0.320 [0.299 - 0.342]         |
| 0.5         | 0.136 [0.120 - 0.154]       | 0.160 [0.150 - 0.172]    | 0.202 [0.184 - 0.221]         | 0.195 [0.166 - 0.227]       | 0.196 [0.179 - 0.214]    | 0.306 [0.285 - 0.329]         |
| 1           | 0.128 [0.112 - 0.145]       | 0.150 [0.139 - 0.161]    | 0.190 [0.172 - 0.209]         | 0.184 [0.156 - 0.217]       | 0.187 [0.170 - 0.205]    | 0.293 [0.271 - 0.316]         |
| 1.5         | 0.120 [0.105 - 0.137]       | 0.140 [0.130 - 0.151]    | 0.179 [0.161 - 0.199]         | 0.174 [0.145 - 0.207]       | 0.180 [0.163 - 0.198]    | 0.280 [0.257 - 0.303]         |
| 2           | 0.113 [0.098 - 0.130]       | 0.131 [0.121 - 0.142]    | 0.170 [0.151 - 0.190]         | 0.164 [0.135 - 0.199]       | 0.174 [0.158 - 0.193]    | 0.267 [0.244 - 0.292]         |
| 2.5         | 0.107 [0.092 - 0.124]       | 0.123 [0.113 - 0.134]    | 0.162 [0.143 - 0.182]         | 0.155 [0.125 - 0.190]       | 0.170 [0.153 - 0.189]    | 0.255 [0.231 - 0.281]         |
| 3           | 0.102 [0.087 - 0.119]       | 0.116 [0.106 - 0.127]    | 0.155 [0.136 - 0.176]         | 0.146 [0.116 - 0.182]       | 0.166 [0.148 - 0.186]    | 0.244 [0.219 - 0.271]         |
| 3.5         | 0.097 [0.082 - 0.115]       | 0.110 [0.100 - 0.122]    | 0.149 [0.129 - 0.171]         | 0.138 [0.107 - 0.175]       | 0.162 [0.143 - 0.184]    | 0.233 [0.207 - 0.261]         |
| 4           | 0.093 [0.077 - 0.111]       | 0.105 [0.094 - 0.117]    | 0.144 [0.123 - 0.166]         | 0.130 [0.099 - 0.168]       | 0.158 [0.138 - 0.180]    | 0.222 [0.195 - 0.252]         |
| 4.5         | 0.089 [0.073 - 0.108]       | 0.101 [0.090 - 0.113]    | 0.139 [0.118 - 0.163]         | 0.122 [0.091 - 0.161]       | 0.153 [0.132 - 0.176]    | 0.212 [0.183 - 0.243]         |
| 5           | 0.085 [0.069 - 0.106]       | 0.097 [0.086 - 0.110]    | 0.135 [0.113 - 0.161]         | 0.115 [0.084 - 0.155]       | 0.148 [0.126 - 0.173]    | 0.202 [0.172 - 0.235]         |

### 3.2

## Preeclampsia

| Age         |                             | <25 yrs                  |                               |                             | 25-29 yrs                |                               |
|-------------|-----------------------------|--------------------------|-------------------------------|-----------------------------|--------------------------|-------------------------------|
| Weight gain | Normal weight<br>(n=1,324)  | Underweight<br>(n=698)   | Overweight/Obese<br>(n=314)   | Normal weight<br>(n=12,406) | Underweight<br>(n=3,943) | Overweight/Obese<br>(n=3,249) |
| -5          | 0.003 [0.000 - 0.032]       | 0.017 [0.008 - 0.035]    | 0.026 [0.010 - 0.065]         | 0.002 [0.001 - 0.007]       | 0.009 [0.006 - 0.014]    | 0.020 [0.014 - 0.029]         |
| -4.5        | 0.003 [0.000 - 0.028]       | 0.017 [0.008 - 0.033]    | 0.027 [0.011 - 0.064]         | 0.002 [0.001 - 0.007]       | 0.009 [0.006 - 0.013]    | 0.020 [0.014 - 0.028]         |
| -4          | 0.003 [0.000 - 0.025]       | 0.016 [0.008 - 0.032]    | 0.028 [0.012 - 0.064]         | 0.002 [0.001 - 0.007]       | 0.009 [0.006 - 0.012]    | 0.020 [0.014 - 0.027]         |
| -3.5        | 0.003 [0.000 - 0.022]       | 0.016 [0.009 - 0.031]    | 0.029 [0.013 - 0.063]         | 0.003 [0.001 - 0.007]       | 0.009 [0.006 - 0.012]    | 0.020 [0.014 - 0.027]         |
| -3          | 0.003 [0.001 - 0.020]       | 0.016 [0.009 - 0.029]    | 0.030 [0.014 - 0.063]         | 0.003 [0.001 - 0.007]       | 0.008 [0.006 - 0.011]    | 0.019 [0.014 - 0.026]         |
| -2.5        | 0.003 [0.001 - 0.019]       | 0.016 [0.009 - 0.028]    | 0.031 [0.015 - 0.063]         | 0.003 [0.001 - 0.007]       | 0.008 [0.006 - 0.011]    | 0.019 [0.014 - 0.026]         |
| -2          | 0.003 [0.001 - 0.017]       | 0.016 [0.009 - 0.028]    | 0.032 [0.016 - 0.063]         | 0.004 [0.002 - 0.007]       | 0.008 [0.006 - 0.011]    | 0.019 [0.014 - 0.026]         |
| -1.5        | 0.004 [0.001 - 0.016]       | 0.016 [0.010 - 0.027]    | 0.033 [0.017 - 0.063]         | 0.004 [0.002 - 0.007]       | 0.008 [0.006 - 0.010]    | 0.019 [0.014 - 0.026]         |
| -1          | 0.004 [0.001 - 0.015]       | 0.016 [0.010 - 0.026]    | 0.034 [0.018 - 0.063]         | 0.004 [0.002 - 0.008]       | 0.008 [0.006 - 0.010]    | 0.019 [0.014 - 0.026]         |
| -0.5        | 0.004 [0.001 - 0.014]       | 0.016 [0.010 - 0.026]    | 0.035 [0.019 - 0.064]         | 0.005 [0.003 - 0.008]       | 0.007 [0.006 - 0.010]    | 0.019 [0.015 - 0.026]         |
| Mean        | 0.004 [0.001 - 0.014]       | 0.016 [0.010 - 0.026]    | 0.036 [0.020 - 0.065]         | 0.005 [0.003 - 0.008]       | 0.007 [0.006 - 0.010]    | 0.020 [0.015 - 0.026]         |
| 0.5         | 0.004 [0.001 - 0.014]       | 0.017 [0.011 - 0.026]    | 0.037 [0.021 - 0.066]         | 0.005 [0.003 - 0.009]       | 0.007 [0.006 - 0.009]    | 0.020 [0.015 - 0.027]         |
| 1           | 0.004 [0.001 - 0.014]       | 0.017 [0.011 - 0.026]    | 0.039 [0.022 - 0.067]         | 0.006 [0.004 - 0.009]       | 0.007 [0.006 - 0.010]    | 0.020 [0.015 - 0.027]         |
| 1.5         | 0.004 [0.001 - 0.014]       | 0.017 [0.011 - 0.026]    | 0.040 [0.023 - 0.069]         | 0.006 [0.004 - 0.010]       | 0.008 [0.006 - 0.010]    | 0.021 [0.016 - 0.028]         |
| 2           | 0.005 [0.001 - 0.014]       | 0.017 [0.011 - 0.026]    | 0.041 [0.023 - 0.071]         | 0.007 [0.004 - 0.010]       | 0.008 [0.006 - 0.010]    | 0.022 [0.016 - 0.029]         |
| 2.5         | 0.005 [0.002 - 0.014]       | 0.017 [0.011 - 0.027]    | 0.042 [0.024 - 0.074]         | 0.007 [0.005 - 0.011]       | 0.008 [0.006 - 0.010]    | 0.023 [0.017 - 0.031]         |
| 3           | 0.005 [0.002 - 0.015]       | 0.018 [0.011 - 0.028]    | 0.044 [0.025 - 0.077]         | 0.007 [0.005 - 0.011]       | 0.008 [0.006 - 0.011]    | 0.024 [0.017 - 0.032]         |
| 3.5         | 0.005 [0.002 - 0.016]       | 0.018 [0.012 - 0.028]    | 0.045 [0.025 - 0.080]         | 0.008 [0.005 - 0.012]       | 0.009 [0.007 - 0.011]    | 0.025 [0.018 - 0.034]         |
| 4           | 0.006 [0.002 - 0.017]       | 0.018 [0.012 - 0.029]    | 0.047 [0.025 - 0.084]         | 0.008 [0.005 - 0.013]       | 0.009 [0.007 - 0.012]    | 0.026 [0.019 - 0.036]         |
| 4.5         | 0.006 [0.002 - 0.018]       | 0.019 [0.012 - 0.030]    | 0.048 [0.025 - 0.089]         | 0.009 [0.006 - 0.014]       | 0.010 [0.007 - 0.013]    | 0.028 [0.020 - 0.039]         |
| 5           | 0.007 [0.002 - 0.020]       | 0.019 [0.012 - 0.032]    | 0.050 [0.026 - 0.094]         | 0.009 [0.006 - 0.015]       | 0.011 [0.008 - 0.014]    | 0.030 [0.021 - 0.042]         |
| Age         |                             | 30-34 yrs                |                               |                             | >34 yrs                  |                               |
| Weight gain | Normal weight<br>(n=12,302) | Underweight<br>(n=2,460) | Overweight/Obese<br>(n=4,749) | Normal weight<br>(n=5,750)  | Underweight<br>(n=704)   | Overweight/Obese<br>(n=3,221) |
| -5          | 0.005 [0.002 - 0.014]       | 0.010 [0.007 - 0.014]    | 0.027 [0.022 - 0.034]         | 0.018 [0.007 - 0.045]       | 0.014 [0.010 - 0.019]    | 0.044 [0.037 - 0.053]         |
| -4.5        | 0.005 [0.002 - 0.013]       | 0.010 [0.007 - 0.013]    | 0.027 [0.022 - 0.034]         | 0.017 [0.007 - 0.043]       | 0.014 [0.010 - 0.019]    | 0.044 [0.037 - 0.053]         |
| -4          | 0.005 [0.002 - 0.012]       | 0.010 [0.008 - 0.013]    | 0.028 [0.023 - 0.034]         | 0.017 [0.007 - 0.040]       | 0.014 [0.011 - 0.019]    | 0.044 [0.037 - 0.053]         |
| -3.5        | 0.005 [0.002 - 0.012]       | 0.010 [0.008 - 0.013]    | 0.028 [0.023 - 0.034]         | 0.017 [0.008 - 0.038]       | 0.015 [0.011 - 0.019]    | 0.045 [0.038 - 0.053]         |
| -3          | 0.005 [0.002 - 0.011]       | 0.010 [0.008 - 0.013]    | 0.028 [0.023 - 0.034]         | 0.017 [0.008 - 0.036]       | 0.015 [0.011 - 0.019]    | 0.045 [0.038 - 0.053]         |
| -2.5        | 0.005 [0.002 - 0.010]       | 0.010 [0.008 - 0.013]    | 0.028 [0.024 - 0.034]         | 0.017 [0.009 - 0.035]       | 0.015 [0.012 - 0.019]    | 0.045 [0.038 - 0.053]         |
| -2          | 0.005 [0.003 - 0.010]       | 0.010 [0.008 - 0.012]    | 0.029 [0.024 - 0.034]         | 0.017 [0.009 - 0.033]       | 0.015 [0.012 - 0.019]    | 0.045 [0.038 - 0.053]         |
| -1.5        | 0.005 [0.003 - 0.010]       | 0.010 [0.008 - 0.012]    | 0.029 [0.024 - 0.035]         | 0.017 [0.009 - 0.032]       | 0.015 [0.012 - 0.019]    | 0.045 [0.038 - 0.053]         |
| -1          | 0.005 [0.003 - 0.010]       | 0.010 [0.008 - 0.013]    | 0.029 [0.025 - 0.035]         | 0.017 [0.009 - 0.031]       | 0.015 [0.012 - 0.019]    | 0.046 [0.039 - 0.054]         |
| -0.5        | 0.005 [0.003 - 0.010]       | 0.010 [0.008 - 0.013]    | 0.030 [0.025 - 0.036]         | 0.017 [0.010 - 0.030]       | 0.016 [0.013 - 0.019]    | 0.046 [0.039 - 0.054]         |
| Mean        | 0.006 [0.003 - 0.010]       | 0.011 [0.009 - 0.013]    | 0.030 [0.025 - 0.036]         | 0.017 [0.010 - 0.030]       | 0.016 [0.013 - 0.019]    | 0.046 [0.038 - 0.055]         |
| 0.5         | 0.006 [0.003 - 0.010]       | 0.011 [0.009 - 0.013]    | 0.031 [0.026 - 0.037]         | 0.017 [0.010 - 0.030]       | 0.016 [0.013 - 0.020]    | 0.046 [0.038 - 0.056]         |
| 1           | 0.006 [0.003 - 0.010]       | 0.011 [0.009 - 0.013]    | 0.031 [0.026 - 0.038]         | 0.017 [0.010 - 0.030]       | 0.016 [0.013 - 0.020]    | 0.047 [0.038 - 0.057]         |
| 1.5         | 0.006 [0.004 - 0.011]       | 0.011 [0.009 - 0.014]    | 0.032 [0.026 - 0.039]         | 0.017 [0.009 - 0.030]       | 0.016 [0.013 - 0.020]    | 0.047 [0.038 - 0.058]         |
| 2           | 0.007 [0.004 - 0.011]       | 0.011 [0.009 - 0.014]    | 0.032 [0.026 - 0.040]         | 0.017 [0.009 - 0.031]       | 0.017 [0.013 - 0.021]    | 0.047 [0.038 - 0.058]         |
| 2.5         | 0.007 [0.004 - 0.012]       | 0.012 [0.010 - 0.014]    | 0.033 [0.027 - 0.041]         | 0.017 [0.009 - 0.032]       | 0.017 [0.013 - 0.021]    | 0.047 [0.038 - 0.060]         |
| 3           | 0.007 [0.004 - 0.012]       | 0.012 [0.010 - 0.015]    | 0.034 [0.027 - 0.042]         | 0.017 [0.009 - 0.033]       | 0.017 [0.013 - 0.022]    | 0.048 [0.037 - 0.061]         |
| 3.5         | 0.008 [0.004 - 0.013]       | 0.012 [0.010 - 0.015]    | 0.034 [0.027 - 0.044]         | 0.017 [0.008 - 0.034]       | 0.017 [0.013 - 0.023]    | 0.048 [0.037 - 0.062]         |
| 4           | 0.008 [0.005 - 0.014]       | 0.013 [0.010 - 0.016]    | 0.035 [0.027 - 0.045]         | 0.017 [0.008 - 0.036]       | 0.017 [0.013 - 0.023]    | 0.048 [0.037 - 0.063]         |
| 4.5         | 0.008 [0.005 - 0.015]       | 0.013 [0.010 - 0.017]    | 0.036 [0.028 - 0.047]         | 0.017 [0.007 - 0.038]       | 0.018 [0.013 - 0.024]    | 0.048 [0.036 - 0.064]         |
| 5           | 0.009 [0.005 - 0.017]       | 0.014 [0.011 - 0.018]    | 0.037 [0.028 - 0.048]         | 0.017 [0.007 - 0.040]       | 0.018 [0.013 - 0.025]    | 0.049 [0.036 - 0.066]         |



### 3.3

## Cesarean delivery

| Age         |                             | <25 yrs                  |                               |                             | 25-29 yrs                |                               |
|-------------|-----------------------------|--------------------------|-------------------------------|-----------------------------|--------------------------|-------------------------------|
| Weight gain | Normal weight<br>(n=1,324)  | Underweight<br>(n=698)   | Overweight/Obese<br>(n=314)   | Normal weight<br>(n=12,406) | Underweight<br>(n=3,943) | Overweight/Obese<br>(n=3,249) |
| -5          | 0.337 [0.275 - 0.406]       | 0.408 [0.362 - 0.456]    | 0.462 [0.385 - 0.540]         | 0.320 [0.283 - 0.359]       | 0.412 [0.394 - 0.430]    | 0.550 [0.526 - 0.574]         |
| -4.5        | 0.339 [0.279 - 0.404]       | 0.409 [0.365 - 0.455]    | 0.465 [0.391 - 0.540]         | 0.331 [0.297 - 0.367]       | 0.416 [0.400 - 0.433]    | 0.554 [0.531 - 0.577]         |
| -4          | 0.341 [0.284 - 0.402]       | 0.411 [0.369 - 0.454]    | 0.468 [0.397 - 0.539]         | 0.342 [0.310 - 0.374]       | 0.420 [0.405 - 0.436]    | 0.559 [0.537 - 0.580]         |
| -3.5        | 0.342 [0.289 - 0.401]       | 0.413 [0.373 - 0.453]    | 0.471 [0.403 - 0.540]         | 0.352 [0.323 - 0.382]       | 0.425 [0.410 - 0.439]    | 0.563 [0.542 - 0.583]         |
| -3          | 0.344 [0.293 - 0.399]       | 0.414 [0.377 - 0.453]    | 0.473 [0.408 - 0.540]         | 0.361 [0.334 - 0.389]       | 0.429 [0.416 - 0.442]    | 0.567 [0.548 - 0.587]         |
| -2.5        | 0.346 [0.298 - 0.398]       | 0.416 [0.380 - 0.452]    | 0.476 [0.413 - 0.541]         | 0.370 [0.345 - 0.396]       | 0.434 [0.421 - 0.446]    | 0.571 [0.553 - 0.590]         |
| -2          | 0.348 [0.302 - 0.396]       | 0.417 [0.384 - 0.452]    | 0.479 [0.417 - 0.542]         | 0.378 [0.354 - 0.403]       | 0.438 [0.426 - 0.450]    | 0.576 [0.558 - 0.594]         |
| -1.5        | 0.350 [0.306 - 0.395]       | 0.419 [0.387 - 0.452]    | 0.482 [0.421 - 0.544]         | 0.385 [0.363 - 0.409]       | 0.443 [0.432 - 0.454]    | 0.580 [0.562 - 0.597]         |
| -1          | 0.351 [0.310 - 0.395]       | 0.421 [0.390 - 0.452]    | 0.486 [0.425 - 0.546]         | 0.392 [0.370 - 0.414]       | 0.448 [0.437 - 0.459]    | 0.584 [0.567 - 0.601]         |
| -0.5        | 0.353 [0.314 - 0.394]       | 0.422 [0.393 - 0.452]    | 0.489 [0.429 - 0.549]         | 0.397 [0.376 - 0.419]       | 0.453 [0.442 - 0.464]    | 0.589 [0.571 - 0.606]         |
| Mean        | 0.355 [0.318 - 0.394]       | 0.424 [0.396 - 0.452]    | 0.492 [0.432 - 0.552]         | 0.402 [0.381 - 0.423]       | 0.458 [0.448 - 0.469]    | 0.593 [0.575 - 0.610]         |
| 0.5         | 0.357 [0.321 - 0.395]       | 0.426 [0.399 - 0.453]    | 0.495 [0.435 - 0.555]         | 0.405 [0.385 - 0.426]       | 0.464 [0.453 - 0.474]    | 0.597 [0.579 - 0.614]         |
| 1           | 0.359 [0.323 - 0.395]       | 0.427 [0.401 - 0.454]    | 0.499 [0.438 - 0.559]         | 0.409 [0.388 - 0.429]       | 0.469 [0.459 - 0.480]    | 0.601 [0.583 - 0.619]         |
| 1.5         | 0.360 [0.326 - 0.397]       | 0.429 [0.403 - 0.456]    | 0.502 [0.441 - 0.564]         | 0.412 [0.391 - 0.432]       | 0.475 [0.464 - 0.486]    | 0.605 [0.587 - 0.624]         |
| 2           | 0.362 [0.327 - 0.399]       | 0.431 [0.404 - 0.458]    | 0.506 [0.443 - 0.568]         | 0.414 [0.394 - 0.435]       | 0.481 [0.470 - 0.492]    | 0.610 [0.590 - 0.629]         |
| 2.5         | 0.364 [0.328 - 0.401]       | 0.432 [0.405 - 0.460]    | 0.510 [0.445 - 0.574]         | 0.417 [0.396 - 0.438]       | 0.487 [0.476 - 0.498]    | 0.614 [0.593 - 0.634]         |
| 3           | 0.366 [0.329 - 0.404]       | 0.434 [0.406 - 0.462]    | 0.514 [0.448 - 0.580]         | 0.420 [0.398 - 0.442]       | 0.493 [0.482 - 0.504]    | 0.618 [0.596 - 0.639]         |
| 3.5         | 0.368 [0.329 - 0.408]       | 0.436 [0.406 - 0.465]    | 0.518 [0.449 - 0.586]         | 0.423 [0.401 - 0.446]       | 0.499 [0.488 - 0.511]    | 0.622 [0.599 - 0.644]         |
| 4           | 0.369 [0.329 - 0.411]       | 0.437 [0.407 - 0.468]    | 0.523 [0.451 - 0.593]         | 0.427 [0.404 - 0.451]       | 0.506 [0.494 - 0.518]    | 0.626 [0.602 - 0.650]         |
| 4.5         | 0.371 [0.329 - 0.416]       | 0.439 [0.407 - 0.471]    | 0.527 [0.453 - 0.601]         | 0.431 [0.406 - 0.456]       | 0.512 [0.500 - 0.525]    | 0.630 [0.605 - 0.655]         |
| 5           | 0.373 [0.328 - 0.420]       | 0.441 [0.407 - 0.475]    | 0.532 [0.454 - 0.609]         | 0.435 [0.409 - 0.462]       | 0.519 [0.505 - 0.533]    | 0.635 [0.608 - 0.661]         |
| Age         |                             | 30-34 yrs                |                               |                             | >34 yrs                  |                               |
| Weight gain | Normal weight<br>(n=12,302) | Underweight<br>(n=2,460) | Overweight/Obese<br>(n=4,749) | Normal weight<br>(n=5,750)  | Underweight<br>(n=704)   | Overweight/Obese<br>(n=3,221) |
| -5          | 0.453 [0.417 - 0.490]       | 0.556 [0.537 - 0.574]    | 0.648 [0.628 - 0.667]         | 0.643 [0.577 - 0.705]       | 0.696 [0.676 - 0.716]    | 0.785 [0.769 - 0.801]         |
| -4.5        | 0.459 [0.425 - 0.494]       | 0.564 [0.547 - 0.581]    | 0.653 [0.634 - 0.672]         | 0.653 [0.591 - 0.709]       | 0.705 [0.686 - 0.723]    | 0.790 [0.774 - 0.805]         |
| -4          | 0.466 [0.433 - 0.498]       | 0.571 [0.555 - 0.587]    | 0.658 [0.640 - 0.676]         | 0.662 [0.605 - 0.714]       | 0.713 [0.695 - 0.730]    | 0.794 [0.779 - 0.809]         |
| -3.5        | 0.472 [0.441 - 0.502]       | 0.577 [0.562 - 0.592]    | 0.663 [0.645 - 0.680]         | 0.670 [0.618 - 0.719]       | 0.720 [0.704 - 0.736]    | 0.799 [0.784 - 0.812]         |
| -3          | 0.478 [0.450 - 0.507]       | 0.583 [0.569 - 0.597]    | 0.667 [0.650 - 0.684]         | 0.679 [0.631 - 0.724]       | 0.728 [0.712 - 0.743]    | 0.803 [0.789 - 0.816]         |
| -2.5        | 0.484 [0.458 - 0.511]       | 0.589 [0.575 - 0.602]    | 0.671 [0.654 - 0.687]         | 0.688 [0.643 - 0.729]       | 0.735 [0.720 - 0.750]    | 0.807 [0.793 - 0.820]         |
| -2          | 0.490 [0.466 - 0.515]       | 0.593 [0.580 - 0.606]    | 0.675 [0.658 - 0.691]         | 0.696 [0.655 - 0.735]       | 0.742 [0.728 - 0.756]    | 0.811 [0.797 - 0.825]         |
| -1.5        | 0.497 [0.473 - 0.520]       | 0.598 [0.585 - 0.610]    | 0.678 [0.661 - 0.694]         | 0.705 [0.666 - 0.741]       | 0.749 [0.735 - 0.763]    | 0.815 [0.801 - 0.829]         |
| -1          | 0.503 [0.481 - 0.525]       | 0.601 [0.589 - 0.613]    | 0.681 [0.665 - 0.698]         | 0.713 [0.676 - 0.747]       | 0.756 [0.742 - 0.769]    | 0.819 [0.805 - 0.833]         |
| -0.5        | 0.509 [0.488 - 0.530]       | 0.605 [0.593 - 0.617]    | 0.684 [0.668 - 0.701]         | 0.721 [0.686 - 0.754]       | 0.762 [0.748 - 0.775]    | 0.823 [0.808 - 0.838]         |
| Mean        | 0.515 [0.495 - 0.536]       | 0.608 [0.596 - 0.620]    | 0.687 [0.671 - 0.704]         | 0.729 [0.694 - 0.761]       | 0.767 [0.754 - 0.780]    | 0.827 [0.811 - 0.842]         |
| 0.5         | 0.522 [0.502 - 0.541]       | 0.611 [0.599 - 0.623]    | 0.690 [0.673 - 0.707]         | 0.737 [0.702 - 0.768]       | 0.773 [0.759 - 0.786]    | 0.831 [0.815 - 0.846]         |
| 1           | 0.528 [0.508 - 0.548]       | 0.614 [0.602 - 0.626]    | 0.693 [0.675 - 0.710]         | 0.744 [0.709 - 0.776]       | 0.778 [0.764 - 0.791]    | 0.835 [0.818 - 0.850]         |
| 1.5         | 0.534 [0.514 - 0.554]       | 0.617 [0.605 - 0.629]    | 0.696 [0.677 - 0.713]         | 0.752 [0.716 - 0.784]       | 0.782 [0.768 - 0.796]    | 0.838 [0.821 - 0.855]         |
| 2           | 0.540 [0.519 - 0.561]       | 0.620 [0.607 - 0.632]    | 0.698 [0.679 - 0.717]         | 0.759 [0.722 - 0.793]       | 0.787 [0.772 - 0.800]    | 0.842 [0.824 - 0.859]         |
| 2.5         | 0.546 [0.525 - 0.568]       | 0.623 [0.610 - 0.636]    | 0.701 [0.681 - 0.720]         | 0.766 [0.728 - 0.801]       | 0.791 [0.776 - 0.805]    | 0.845 [0.826 - 0.863]         |
| 3           | 0.553 [0.529 - 0.576]       | 0.626 [0.613 - 0.639]    | 0.703 [0.682 - 0.723]         | 0.773 [0.733 - 0.809]       | 0.795 [0.779 - 0.809]    | 0.849 [0.829 - 0.867]         |
| 3.5         | 0.559 [0.534 - 0.583]       | 0.630 [0.616 - 0.644]    | 0.705 [0.683 - 0.726]         | 0.780 [0.737 - 0.818]       | 0.799 [0.782 - 0.814]    | 0.852 [0.832 - 0.871]         |
| 4           | 0.565 [0.539 - 0.591]       | 0.634 [0.619 - 0.648]    | 0.707 [0.684 - 0.730]         | 0.787 [0.742 - 0.826]       | 0.802 [0.785 - 0.818]    | 0.856 [0.834 - 0.875]         |
| 4.5         | 0.571 [0.543 - 0.599]       | 0.638 [0.622 - 0.654]    | 0.709 [0.684 - 0.733]         | 0.794 [0.746 - 0.834]       | 0.806 [0.787 - 0.823]    | 0.859 [0.837 - 0.879]         |
| 5           | 0.577 [0.547 - 0.607]       | 0.643 [0.626 - 0.659]    | 0.711 [0.684 - 0.737]         | 0.800 [0.750 - 0.842]       | 0.809 [0.789 - 0.827]    | 0.862 [0.839 - 0.882]         |

## 3.4

## Preterm delivery

| Age         |                             | <25 yrs                  |                               |                             | 25-29 yrs                |                               |
|-------------|-----------------------------|--------------------------|-------------------------------|-----------------------------|--------------------------|-------------------------------|
| Weight gain | Normal weight<br>(n=1,324)  | Underweight<br>(n=698)   | Overweight/Obese<br>(n=314)   | Normal weight<br>(n=12,406) | Underweight<br>(n=3,943) | Overweight/Obese<br>(n=3,249) |
| -5          | 0.164 [0.114 - 0.230]       | 0.130 [0.099 - 0.170]    | 0.140 [0.096 - 0.201]         | 0.091 [0.071 - 0.115]       | 0.101 [0.088 - 0.116]    | 0.087 [0.073 - 0.103]         |
| -4.5        | 0.153 [0.108 - 0.211]       | 0.122 [0.094 - 0.157]    | 0.134 [0.093 - 0.191]         | 0.083 [0.066 - 0.104]       | 0.092 [0.081 - 0.105]    | 0.083 [0.070 - 0.098]         |
| -4          | 0.142 [0.102 - 0.194]       | 0.114 [0.089 - 0.145]    | 0.129 [0.090 - 0.181]         | 0.076 [0.061 - 0.094]       | 0.083 [0.073 - 0.094]    | 0.079 [0.066 - 0.093]         |
| -3.5        | 0.132 [0.096 - 0.177]       | 0.107 [0.084 - 0.134]    | 0.123 [0.087 - 0.172]         | 0.069 [0.056 - 0.085]       | 0.075 [0.066 - 0.085]    | 0.074 [0.063 - 0.088]         |
| -3          | 0.122 [0.090 - 0.163]       | 0.100 [0.079 - 0.125]    | 0.118 [0.084 - 0.164]         | 0.063 [0.052 - 0.077]       | 0.067 [0.059 - 0.076]    | 0.071 [0.060 - 0.083]         |
| -2.5        | 0.113 [0.085 - 0.149]       | 0.093 [0.075 - 0.115]    | 0.113 [0.080 - 0.156]         | 0.058 [0.048 - 0.070]       | 0.060 [0.053 - 0.068]    | 0.067 [0.057 - 0.078]         |
| -2          | 0.105 [0.079 - 0.137]       | 0.087 [0.070 - 0.107]    | 0.108 [0.076 - 0.149]         | 0.053 [0.044 - 0.064]       | 0.054 [0.048 - 0.061]    | 0.063 [0.053 - 0.074]         |
| -1.5        | 0.097 [0.074 - 0.126]       | 0.081 [0.066 - 0.100]    | 0.103 [0.073 - 0.143]         | 0.049 [0.041 - 0.059]       | 0.048 [0.043 - 0.055]    | 0.059 [0.050 - 0.070]         |
| -1          | 0.090 [0.068 - 0.117]       | 0.076 [0.061 - 0.093]    | 0.098 [0.069 - 0.138]         | 0.045 [0.037 - 0.054]       | 0.044 [0.038 - 0.049]    | 0.056 [0.047 - 0.066]         |
| -0.5        | 0.083 [0.063 - 0.108]       | 0.071 [0.057 - 0.087]    | 0.094 [0.065 - 0.133]         | 0.041 [0.035 - 0.050]       | 0.039 [0.035 - 0.045]    | 0.052 [0.044 - 0.062]         |
| Mean        | 0.076 [0.058 - 0.100]       | 0.066 [0.053 - 0.081]    | 0.090 [0.062 - 0.129]         | 0.038 [0.032 - 0.046]       | 0.036 [0.031 - 0.041]    | 0.049 [0.041 - 0.059]         |
| 0.5         | 0.071 [0.053 - 0.094]       | 0.061 [0.049 - 0.076]    | 0.086 [0.058 - 0.125]         | 0.036 [0.029 - 0.043]       | 0.032 [0.028 - 0.037]    | 0.046 [0.038 - 0.056]         |
| 1           | 0.065 [0.048 - 0.087]       | 0.057 [0.045 - 0.072]    | 0.082 [0.054 - 0.121]         | 0.033 [0.027 - 0.040]       | 0.030 [0.026 - 0.034]    | 0.043 [0.035 - 0.052]         |
| 1.5         | 0.060 [0.044 - 0.082]       | 0.053 [0.042 - 0.068]    | 0.078 [0.051 - 0.118]         | 0.031 [0.025 - 0.037]       | 0.027 [0.023 - 0.031]    | 0.040 [0.033 - 0.050]         |
| 2           | 0.055 [0.040 - 0.077]       | 0.049 [0.038 - 0.064]    | 0.074 [0.047 - 0.115]         | 0.029 [0.023 - 0.035]       | 0.025 [0.022 - 0.029]    | 0.038 [0.030 - 0.047]         |
| 2.5         | 0.051 [0.036 - 0.072]       | 0.046 [0.035 - 0.060]    | 0.071 [0.044 - 0.113]         | 0.027 [0.021 - 0.033]       | 0.023 [0.020 - 0.027]    | 0.035 [0.028 - 0.045]         |
| 3           | 0.047 [0.032 - 0.068]       | 0.043 [0.032 - 0.057]    | 0.068 [0.041 - 0.110]         | 0.025 [0.020 - 0.031]       | 0.022 [0.018 - 0.026]    | 0.033 [0.026 - 0.043]         |
| 3.5         | 0.043 [0.029 - 0.064]       | 0.040 [0.029 - 0.054]    | 0.065 [0.038 - 0.108]         | 0.023 [0.018 - 0.030]       | 0.020 [0.017 - 0.024]    | 0.031 [0.024 - 0.041]         |
| 4           | 0.040 [0.026 - 0.061]       | 0.037 [0.027 - 0.051]    | 0.062 [0.035 - 0.106]         | 0.022 [0.016 - 0.028]       | 0.019 [0.015 - 0.023]    | 0.029 [0.022 - 0.039]         |
| 4.5         | 0.037 [0.023 - 0.058]       | 0.034 [0.024 - 0.049]    | 0.059 [0.033 - 0.104]         | 0.020 [0.015 - 0.027]       | 0.018 [0.014 - 0.022]    | 0.027 [0.020 - 0.038]         |
| 5           | 0.034 [0.021 - 0.054]       | 0.032 [0.022 - 0.046]    | 0.056 [0.030 - 0.102]         | 0.019 [0.014 - 0.026]       | 0.017 [0.013 - 0.021]    | 0.026 [0.018 - 0.036]         |
| Age         |                             | 30-34 yrs                |                               |                             | >34 yrs                  |                               |
| Weight gain | Normal weight<br>(n=12,302) | Underweight<br>(n=2,460) | Overweight/Obese<br>(n=4,749) | Normal weight<br>(n=5,750)  | Underweight<br>(n=704)   | Overweight/Obese<br>(n=3,221) |
| -5          | 0.129 [0.099 - 0.167]       | 0.088 [0.080 - 0.097]    | 0.074 [0.060 - 0.090]         | 0.165 [0.117 - 0.227]       | 0.102 [0.089 - 0.116]    | 0.092 [0.081 - 0.103]         |
| -4.5        | 0.117 [0.091 - 0.150]       | 0.081 [0.074 - 0.089]    | 0.067 [0.055 - 0.082]         | 0.150 [0.109 - 0.204]       | 0.094 [0.083 - 0.107]    | 0.088 [0.078 - 0.099]         |
| -4          | 0.107 [0.084 - 0.135]       | 0.075 [0.069 - 0.082]    | 0.061 [0.051 - 0.074]         | 0.137 [0.100 - 0.185]       | 0.088 [0.077 - 0.099]    | 0.084 [0.075 - 0.095]         |
| -3.5        | 0.097 [0.077 - 0.122]       | 0.070 [0.064 - 0.076]    | 0.057 [0.047 - 0.069]         | 0.125 [0.093 - 0.167]       | 0.081 [0.072 - 0.092]    | 0.080 [0.071 - 0.091]         |
| -3          | 0.088 [0.070 - 0.110]       | 0.064 [0.059 - 0.070]    | 0.053 [0.044 - 0.065]         | 0.115 [0.085 - 0.153]       | 0.076 [0.067 - 0.085]    | 0.077 [0.068 - 0.087]         |
| -2.5        | 0.079 [0.063 - 0.099]       | 0.059 [0.055 - 0.064]    | 0.050 [0.041 - 0.061]         | 0.105 [0.079 - 0.140]       | 0.070 [0.062 - 0.079]    | 0.074 [0.065 - 0.084]         |
| -2          | 0.071 [0.057 - 0.089]       | 0.055 [0.051 - 0.059]    | 0.048 [0.039 - 0.059]         | 0.097 [0.073 - 0.128]       | 0.065 [0.058 - 0.074]    | 0.070 [0.062 - 0.080]         |
| -1.5        | 0.064 [0.051 - 0.079]       | 0.051 [0.047 - 0.055]    | 0.047 [0.038 - 0.057]         | 0.089 [0.067 - 0.119]       | 0.061 [0.054 - 0.069]    | 0.067 [0.059 - 0.077]         |
| -1          | 0.057 [0.046 - 0.071]       | 0.047 [0.043 - 0.051]    | 0.045 [0.037 - 0.056]         | 0.083 [0.062 - 0.110]       | 0.057 [0.050 - 0.064]    | 0.064 [0.056 - 0.075]         |
| -0.5        | 0.051 [0.041 - 0.064]       | 0.043 [0.039 - 0.047]    | 0.044 [0.036 - 0.055]         | 0.077 [0.057 - 0.103]       | 0.053 [0.047 - 0.061]    | 0.062 [0.053 - 0.072]         |
| Mean        | 0.045 [0.036 - 0.057]       | 0.040 [0.036 - 0.043]    | 0.043 [0.034 - 0.054]         | 0.072 [0.053 - 0.097]       | 0.050 [0.044 - 0.057]    | 0.059 [0.050 - 0.069]         |
| 0.5         | 0.041 [0.032 - 0.052]       | 0.036 [0.033 - 0.040]    | 0.042 [0.033 - 0.052]         | 0.067 [0.049 - 0.091]       | 0.047 [0.041 - 0.054]    | 0.056 [0.047 - 0.067]         |
| 1           | 0.036 [0.028 - 0.047]       | 0.034 [0.030 - 0.037]    | 0.040 [0.031 - 0.051]         | 0.063 [0.045 - 0.087]       | 0.044 [0.038 - 0.051]    | 0.054 [0.045 - 0.065]         |
| 1.5         | 0.033 [0.025 - 0.043]       | 0.031 [0.028 - 0.035]    | 0.038 [0.029 - 0.049]         | 0.059 [0.042 - 0.083]       | 0.042 [0.036 - 0.049]    | 0.051 [0.042 - 0.062]         |
| 2           | 0.030 [0.022 - 0.040]       | 0.028 [0.025 - 0.032]    | 0.036 [0.027 - 0.047]         | 0.056 [0.039 - 0.080]       | 0.039 [0.033 - 0.046]    | 0.049 [0.040 - 0.060]         |
| 2.5         | 0.027 [0.020 - 0.037]       | 0.026 [0.023 - 0.030]    | 0.034 [0.025 - 0.045]         | 0.053 [0.036 - 0.077]       | 0.037 [0.031 - 0.044]    | 0.047 [0.038 - 0.058]         |
| 3           | 0.025 [0.018 - 0.035]       | 0.024 [0.021 - 0.028]    | 0.031 [0.023 - 0.043]         | 0.050 [0.033 - 0.075]       | 0.035 [0.029 - 0.043]    | 0.045 [0.036 - 0.056]         |
| 3.5         | 0.023 [0.016 - 0.033]       | 0.022 [0.019 - 0.026]    | 0.029 [0.020 - 0.040]         | 0.048 [0.031 - 0.073]       | 0.033 [0.027 - 0.041]    | 0.043 [0.034 - 0.055]         |
| 4           | 0.022 [0.015 - 0.032]       | 0.020 [0.017 - 0.024]    | 0.026 [0.018 - 0.038]         | 0.045 [0.028 - 0.072]       | 0.032 [0.025 - 0.040]    | 0.041 [0.032 - 0.053]         |
| 4.5         | 0.020 [0.013 - 0.031]       | 0.019 [0.016 - 0.022]    | 0.024 [0.016 - 0.037]         | 0.043 [0.026 - 0.072]       | 0.030 [0.024 - 0.039]    | 0.039 [0.030 - 0.051]         |
| 5           | 0.020 [0.012 - 0.031]       | 0.017 [0.015 - 0.021]    | 0.022 [0.014 - 0.036]         | 0.041 [0.023 - 0.072]       | 0.029 [0.022 - 0.038]    | 0.037 [0.028 - 0.049]         |

### 3.5

#### Stillbirth

| Age         |                             | <25 yrs                  |                               |                             | 25-29 yrs                |                               |
|-------------|-----------------------------|--------------------------|-------------------------------|-----------------------------|--------------------------|-------------------------------|
| Weight gain | Normal weight<br>(n=1,324)  | Underweight<br>(n=698)   | Overweight/Obese<br>(n=314)   | Normal weight<br>(n=12,406) | Underweight<br>(n=3,943) | Overweight/Obese<br>(n=3,249) |
| -5          | 0.060 [0.030 - 0.115]       | 0.043 [0.025 - 0.071]    | 0.047 [0.024 - 0.089]         | 0.049 [0.034 - 0.071]       | 0.030 [0.024 - 0.036]    | 0.021 [0.014 - 0.032]         |
| -4.5        | 0.047 [0.023 - 0.092]       | 0.035 [0.021 - 0.059]    | 0.042 [0.022 - 0.081]         | 0.036 [0.025 - 0.053]       | 0.023 [0.019 - 0.028]    | 0.018 [0.012 - 0.027]         |
| -4          | 0.037 [0.018 - 0.074]       | 0.029 [0.017 - 0.049]    | 0.038 [0.019 - 0.074]         | 0.027 [0.018 - 0.040]       | 0.018 [0.014 - 0.022]    | 0.015 [0.010 - 0.022]         |
| -3.5        | 0.029 [0.014 - 0.060]       | 0.024 [0.014 - 0.041]    | 0.034 [0.017 - 0.068]         | 0.020 [0.013 - 0.030]       | 0.014 [0.011 - 0.017]    | 0.012 [0.008 - 0.019]         |
| -3          | 0.023 [0.010 - 0.049]       | 0.019 [0.011 - 0.034]    | 0.030 [0.015 - 0.062]         | 0.014 [0.009 - 0.022]       | 0.011 [0.008 - 0.014]    | 0.010 [0.007 - 0.016]         |
| -2.5        | 0.018 [0.008 - 0.040]       | 0.016 [0.009 - 0.029]    | 0.027 [0.013 - 0.058]         | 0.011 [0.007 - 0.017]       | 0.008 [0.006 - 0.011]    | 0.009 [0.005 - 0.014]         |
| -2          | 0.014 [0.006 - 0.033]       | 0.013 [0.007 - 0.025]    | 0.024 [0.011 - 0.054]         | 0.008 [0.005 - 0.013]       | 0.006 [0.005 - 0.008]    | 0.008 [0.005 - 0.012]         |
| -1.5        | 0.011 [0.004 - 0.028]       | 0.011 [0.006 - 0.021]    | 0.022 [0.009 - 0.050]         | 0.006 [0.003 - 0.010]       | 0.005 [0.003 - 0.007]    | 0.007 [0.004 - 0.011]         |
| -1          | 0.009 [0.003 - 0.024]       | 0.009 [0.005 - 0.018]    | 0.020 [0.008 - 0.047]         | 0.004 [0.002 - 0.008]       | 0.004 [0.003 - 0.005]    | 0.006 [0.003 - 0.010]         |
| -0.5        | 0.007 [0.002 - 0.020]       | 0.008 [0.004 - 0.016]    | 0.017 [0.007 - 0.045]         | 0.003 [0.002 - 0.006]       | 0.003 [0.002 - 0.004]    | 0.005 [0.003 - 0.009]         |
| Mean        | 0.005 [0.002 - 0.017]       | 0.006 [0.003 - 0.014]    | 0.016 [0.006 - 0.042]         | 0.003 [0.001 - 0.005]       | 0.002 [0.001 - 0.003]    | 0.005 [0.002 - 0.008]         |
| 0.5         | 0.004 [0.001 - 0.015]       | 0.005 [0.002 - 0.012]    | 0.014 [0.005 - 0.040]         | 0.002 [0.001 - 0.004]       | 0.002 [0.001 - 0.003]    | 0.004 [0.002 - 0.008]         |
| 1           | 0.003 [0.001 - 0.013]       | 0.005 [0.002 - 0.011]    | 0.012 [0.004 - 0.038]         | 0.002 [0.001 - 0.004]       | 0.001 [0.001 - 0.002]    | 0.004 [0.002 - 0.007]         |
| 1.5         | 0.003 [0.001 - 0.011]       | 0.004 [0.001 - 0.010]    | 0.011 [0.003 - 0.036]         | 0.001 [0.000 - 0.003]       | 0.001 [0.001 - 0.002]    | 0.003 [0.002 - 0.007]         |
| 2           | 0.002 [0.000 - 0.010]       | 0.003 [0.001 - 0.009]    | 0.010 [0.003 - 0.034]         | 0.001 [0.000 - 0.003]       | 0.001 [0.000 - 0.001]    | 0.003 [0.001 - 0.007]         |
| 2.5         | 0.002 [0.000 - 0.009]       | 0.003 [0.001 - 0.008]    | 0.009 [0.002 - 0.032]         | 0.001 [0.000 - 0.002]       | 0.001 [0.000 - 0.001]    | 0.003 [0.001 - 0.007]         |
| 3           | 0.001 [0.000 - 0.008]       | 0.002 [0.001 - 0.008]    | 0.008 [0.002 - 0.031]         | 0.001 [0.000 - 0.002]       | 0.000 [0.000 - 0.001]    | 0.003 [0.001 - 0.007]         |
| 3.5         | 0.001 [0.000 - 0.007]       | 0.002 [0.001 - 0.007]    | 0.007 [0.002 - 0.029]         | 0.000 [0.000 - 0.002]       | 0.000 [0.000 - 0.001]    | 0.002 [0.001 - 0.007]         |
| 4           | 0.001 [0.000 - 0.006]       | 0.002 [0.000 - 0.007]    | 0.006 [0.001 - 0.028]         | 0.000 [0.000 - 0.001]       | 0.000 [0.000 - 0.000]    | 0.002 [0.001 - 0.007]         |
| 4.5         | 0.001 [0.000 - 0.005]       | 0.001 [0.000 - 0.006]    | 0.006 [0.001 - 0.027]         | 0.000 [0.000 - 0.001]       | 0.000 [0.000 - 0.000]    | 0.002 [0.001 - 0.007]         |
| 5           | 0.001 [0.000 - 0.005]       | 0.001 [0.000 - 0.006]    | 0.005 [0.001 - 0.025]         | 0.000 [0.000 - 0.001]       | 0.000 [0.000 - 0.000]    | 0.002 [0.001 - 0.007]         |
| Age         |                             | 30-34 yrs                |                               |                             | >34 yrs                  |                               |
| Weight gain | Normal weight<br>(n=12,302) | Underweight<br>(n=2,460) | Overweight/Obese<br>(n=4,749) | Normal weight<br>(n=5,750)  | Underweight<br>(n=703)   | Overweight/Obese<br>(n=3,221) |
| -5          | 0.024 [0.012 - 0.048]       | 0.015 [0.011 - 0.021]    | 0.014 [0.009 - 0.021]         | 0.021 [0.008 - 0.051]       | 0.025 [0.017 - 0.035]    | 0.016 [0.010 - 0.025]         |
| -4.5        | 0.017 [0.008 - 0.035]       | 0.012 [0.008 - 0.016]    | 0.011 [0.007 - 0.018]         | 0.018 [0.008 - 0.044]       | 0.020 [0.014 - 0.028]    | 0.013 [0.008 - 0.021]         |
| -4          | 0.012 [0.006 - 0.026]       | 0.009 [0.007 - 0.013]    | 0.009 [0.006 - 0.015]         | 0.016 [0.007 - 0.038]       | 0.016 [0.011 - 0.023]    | 0.010 [0.006 - 0.017]         |
| -3.5        | 0.009 [0.004 - 0.019]       | 0.008 [0.005 - 0.011]    | 0.008 [0.005 - 0.013]         | 0.014 [0.006 - 0.033]       | 0.012 [0.008 - 0.019]    | 0.008 [0.004 - 0.014]         |
| -3          | 0.006 [0.003 - 0.014]       | 0.006 [0.004 - 0.009]    | 0.007 [0.004 - 0.011]         | 0.013 [0.005 - 0.029]       | 0.010 [0.006 - 0.015]    | 0.006 [0.003 - 0.012]         |
| -2.5        | 0.004 [0.002 - 0.011]       | 0.005 [0.003 - 0.008]    | 0.006 [0.003 - 0.010]         | 0.011 [0.005 - 0.026]       | 0.008 [0.005 - 0.012]    | 0.005 [0.003 - 0.010]         |
| -2          | 0.003 [0.001 - 0.009]       | 0.004 [0.003 - 0.006]    | 0.005 [0.003 - 0.009]         | 0.010 [0.004 - 0.023]       | 0.006 [0.004 - 0.010]    | 0.004 [0.002 - 0.009]         |
| -1.5        | 0.003 [0.001 - 0.007]       | 0.004 [0.002 - 0.006]    | 0.004 [0.002 - 0.008]         | 0.009 [0.004 - 0.021]       | 0.004 [0.003 - 0.008]    | 0.003 [0.001 - 0.007]         |
| -1          | 0.002 [0.001 - 0.006]       | 0.003 [0.002 - 0.005]    | 0.004 [0.002 - 0.007]         | 0.008 [0.004 - 0.020]       | 0.003 [0.002 - 0.006]    | 0.003 [0.001 - 0.007]         |
| -0.5        | 0.002 [0.001 - 0.005]       | 0.002 [0.002 - 0.004]    | 0.003 [0.002 - 0.006]         | 0.008 [0.003 - 0.019]       | 0.003 [0.001 - 0.005]    | 0.002 [0.001 - 0.006]         |
| Mean        | 0.002 [0.000 - 0.005]       | 0.002 [0.001 - 0.003]    | 0.003 [0.001 - 0.006]         | 0.007 [0.003 - 0.018]       | 0.002 [0.001 - 0.004]    | 0.002 [0.001 - 0.005]         |
| 0.5         | 0.001 [0.000 - 0.004]       | 0.002 [0.001 - 0.003]    | 0.003 [0.001 - 0.006]         | 0.007 [0.003 - 0.017]       | 0.002 [0.001 - 0.004]    | 0.001 [0.000 - 0.005]         |
| 1           | 0.001 [0.000 - 0.004]       | 0.001 [0.001 - 0.003]    | 0.002 [0.001 - 0.006]         | 0.006 [0.002 - 0.017]       | 0.001 [0.000 - 0.003]    | 0.001 [0.000 - 0.005]         |
| 1.5         | 0.001 [0.000 - 0.004]       | 0.001 [0.001 - 0.002]    | 0.002 [0.001 - 0.005]         | 0.006 [0.002 - 0.017]       | 0.001 [0.000 - 0.003]    | 0.001 [0.000 - 0.005]         |
| 2           | 0.001 [0.000 - 0.005]       | 0.001 [0.001 - 0.002]    | 0.002 [0.001 - 0.005]         | 0.005 [0.002 - 0.017]       | 0.001 [0.000 - 0.003]    | 0.001 [0.000 - 0.005]         |
| 2.5         | 0.001 [0.000 - 0.005]       | 0.001 [0.000 - 0.002]    | 0.002 [0.001 - 0.005]         | 0.005 [0.002 - 0.017]       | 0.001 [0.000 - 0.003]    | 0.001 [0.000 - 0.006]         |
| 3           | 0.001 [0.000 - 0.005]       | 0.001 [0.000 - 0.002]    | 0.002 [0.000 - 0.006]         | 0.005 [0.001 - 0.017]       | 0.001 [0.000 - 0.003]    | 0.001 [0.000 - 0.006]         |
| 3.5         | 0.001 [0.000 - 0.006]       | 0.001 [0.000 - 0.002]    | 0.001 [0.000 - 0.006]         | 0.005 [0.001 - 0.018]       | 0.000 [0.000 - 0.003]    | 0.000 [0.000 - 0.007]         |
| 4           | 0.001 [0.000 - 0.006]       | 0.001 [0.000 - 0.002]    | 0.001 [0.000 - 0.006]         | 0.004 [0.001 - 0.019]       | 0.000 [0.000 - 0.003]    | 0.000 [0.000 - 0.008]         |
| 4.5         | 0.001 [0.000 - 0.007]       | 0.001 [0.000 - 0.002]    | 0.001 [0.000 - 0.007]         | 0.004 [0.001 - 0.020]       | 0.000 [0.000 - 0.003]    | 0.000 [0.000 - 0.009]         |
| 5           | 0.001 [0.000 - 0.008]       | 0.001 [0.000 - 0.002]    | 0.001 [0.000 - 0.007]         | 0.004 [0.001 - 0.021]       | 0.000 [0.000 - 0.003]    | 0.000 [0.000 - 0.010]         |

### 3.6

## Macrosomia

| Age         |                             | <25 yrs                  |                               |                             | 25-29 yrs                |                               |
|-------------|-----------------------------|--------------------------|-------------------------------|-----------------------------|--------------------------|-------------------------------|
| Weight gain | Normal weight<br>(n=1,317)  | Underweight<br>(n=697)   | Overweight/Obese<br>(n=313)   | Normal weight<br>(n=12,390) | Underweight<br>(n=3,940) | Overweight/Obese<br>(n=3,236) |
| -5          | 0.003 [0.000 - 0.016]       | 0.012 [0.006 - 0.023]    | 0.052 [0.027 - 0.098]         | 0.002 [0.001 - 0.005]       | 0.013 [0.011 - 0.017]    | 0.043 [0.035 - 0.054]         |
| -4.5        | 0.003 [0.001 - 0.016]       | 0.013 [0.007 - 0.024]    | 0.054 [0.029 - 0.098]         | 0.003 [0.001 - 0.006]       | 0.014 [0.012 - 0.018]    | 0.046 [0.037 - 0.056]         |
| -4          | 0.003 [0.001 - 0.016]       | 0.014 [0.008 - 0.025]    | 0.056 [0.031 - 0.098]         | 0.003 [0.001 - 0.006]       | 0.016 [0.013 - 0.019]    | 0.048 [0.039 - 0.058]         |
| -3.5        | 0.003 [0.001 - 0.016]       | 0.015 [0.009 - 0.026]    | 0.057 [0.033 - 0.099]         | 0.003 [0.002 - 0.007]       | 0.017 [0.014 - 0.020]    | 0.050 [0.042 - 0.060]         |
| -3          | 0.004 [0.001 - 0.017]       | 0.016 [0.009 - 0.027]    | 0.059 [0.035 - 0.100]         | 0.004 [0.002 - 0.007]       | 0.018 [0.015 - 0.021]    | 0.053 [0.045 - 0.063]         |
| -2.5        | 0.004 [0.001 - 0.017]       | 0.017 [0.010 - 0.029]    | 0.061 [0.037 - 0.101]         | 0.004 [0.002 - 0.008]       | 0.019 [0.017 - 0.023]    | 0.056 [0.047 - 0.065]         |
| -2          | 0.005 [0.001 - 0.017]       | 0.019 [0.012 - 0.030]    | 0.064 [0.039 - 0.102]         | 0.005 [0.003 - 0.008]       | 0.021 [0.018 - 0.024]    | 0.058 [0.050 - 0.068]         |
| -1.5        | 0.005 [0.001 - 0.017]       | 0.020 [0.013 - 0.032]    | 0.066 [0.041 - 0.103]         | 0.005 [0.003 - 0.009]       | 0.022 [0.019 - 0.026]    | 0.061 [0.053 - 0.071]         |
| -1          | 0.005 [0.002 - 0.018]       | 0.022 [0.014 - 0.033]    | 0.068 [0.044 - 0.104]         | 0.006 [0.004 - 0.010]       | 0.024 [0.021 - 0.027]    | 0.064 [0.056 - 0.074]         |
| -0.5        | 0.006 [0.002 - 0.018]       | 0.023 [0.016 - 0.035]    | 0.070 [0.046 - 0.106]         | 0.007 [0.005 - 0.011]       | 0.026 [0.023 - 0.029]    | 0.068 [0.059 - 0.077]         |
| Mean        | 0.007 [0.002 - 0.019]       | 0.025 [0.017 - 0.037]    | 0.073 [0.048 - 0.108]         | 0.008 [0.005 - 0.012]       | 0.028 [0.025 - 0.031]    | 0.071 [0.062 - 0.081]         |
| 0.5         | 0.007 [0.003 - 0.019]       | 0.027 [0.019 - 0.039]    | 0.075 [0.050 - 0.111]         | 0.009 [0.006 - 0.013]       | 0.030 [0.027 - 0.033]    | 0.075 [0.066 - 0.084]         |
| 1           | 0.008 [0.003 - 0.020]       | 0.029 [0.021 - 0.041]    | 0.077 [0.052 - 0.113]         | 0.010 [0.007 - 0.014]       | 0.032 [0.029 - 0.035]    | 0.078 [0.069 - 0.088]         |
| 1.5         | 0.009 [0.004 - 0.020]       | 0.031 [0.023 - 0.043]    | 0.080 [0.054 - 0.117]         | 0.011 [0.008 - 0.016]       | 0.034 [0.031 - 0.038]    | 0.082 [0.073 - 0.093]         |
| 2           | 0.009 [0.004 - 0.021]       | 0.034 [0.025 - 0.046]    | 0.083 [0.056 - 0.121]         | 0.013 [0.010 - 0.018]       | 0.037 [0.034 - 0.040]    | 0.086 [0.076 - 0.097]         |
| 2.5         | 0.010 [0.005 - 0.022]       | 0.036 [0.027 - 0.048]    | 0.085 [0.058 - 0.125]         | 0.015 [0.011 - 0.019]       | 0.040 [0.036 - 0.043]    | 0.090 [0.080 - 0.102]         |
| 3           | 0.011 [0.005 - 0.023]       | 0.039 [0.029 - 0.051]    | 0.088 [0.059 - 0.130]         | 0.016 [0.012 - 0.022]       | 0.042 [0.039 - 0.046]    | 0.095 [0.083 - 0.108]         |
| 3.5         | 0.012 [0.006 - 0.025]       | 0.042 [0.032 - 0.055]    | 0.091 [0.060 - 0.135]         | 0.018 [0.014 - 0.024]       | 0.046 [0.042 - 0.050]    | 0.099 [0.087 - 0.114]         |
| 4           | 0.013 [0.007 - 0.027]       | 0.045 [0.034 - 0.059]    | 0.094 [0.062 - 0.141]         | 0.021 [0.016 - 0.027]       | 0.049 [0.045 - 0.054]    | 0.104 [0.090 - 0.120]         |
| 4.5         | 0.015 [0.007 - 0.029]       | 0.048 [0.037 - 0.063]    | 0.097 [0.063 - 0.148]         | 0.023 [0.018 - 0.030]       | 0.052 [0.048 - 0.058]    | 0.109 [0.094 - 0.126]         |
| 5           | 0.016 [0.008 - 0.032]       | 0.052 [0.039 - 0.068]    | 0.100 [0.064 - 0.155]         | 0.026 [0.020 - 0.034]       | 0.056 [0.051 - 0.062]    | 0.114 [0.098 - 0.133]         |
| Age         |                             | 30-34 yrs                |                               |                             | >34 yrs                  |                               |
| Weight gain | Normal weight<br>(n=12,281) | Underweight<br>(n=2,458) | Overweight/Obese<br>(n=4,738) | Normal weight<br>(n=5,735)  | Underweight<br>(n=703)   | Overweight/Obese<br>(n=3,211) |
| -5          | 0.003 [0.001 - 0.009]       | 0.014 [0.011 - 0.017]    | 0.042 [0.034 - 0.051]         | 0.000 [0.000 - 0.033]       | 0.016 [0.012 - 0.021]    | 0.041 [0.034 - 0.050]         |
| -4.5        | 0.003 [0.001 - 0.009]       | 0.015 [0.013 - 0.018]    | 0.044 [0.037 - 0.053]         | 0.000 [0.000 - 0.028]       | 0.017 [0.013 - 0.022]    | 0.044 [0.036 - 0.053]         |
| -4          | 0.003 [0.001 - 0.009]       | 0.016 [0.014 - 0.020]    | 0.047 [0.040 - 0.056]         | 0.000 [0.000 - 0.023]       | 0.018 [0.014 - 0.023]    | 0.046 [0.039 - 0.055]         |
| -3.5        | 0.004 [0.002 - 0.010]       | 0.018 [0.015 - 0.021]    | 0.051 [0.043 - 0.060]         | 0.000 [0.000 - 0.020]       | 0.020 [0.016 - 0.025]    | 0.049 [0.041 - 0.058]         |
| -3          | 0.005 [0.002 - 0.010]       | 0.019 [0.017 - 0.023]    | 0.054 [0.047 - 0.064]         | 0.000 [0.000 - 0.017]       | 0.021 [0.017 - 0.026]    | 0.052 [0.044 - 0.060]         |
| -2.5        | 0.005 [0.003 - 0.011]       | 0.021 [0.018 - 0.024]    | 0.058 [0.050 - 0.068]         | 0.000 [0.000 - 0.016]       | 0.023 [0.018 - 0.028]    | 0.054 [0.047 - 0.063]         |
| -2          | 0.006 [0.003 - 0.012]       | 0.023 [0.020 - 0.026]    | 0.062 [0.054 - 0.072]         | 0.000 [0.000 - 0.014]       | 0.024 [0.020 - 0.029]    | 0.057 [0.050 - 0.066]         |
| -1.5        | 0.007 [0.004 - 0.013]       | 0.025 [0.022 - 0.028]    | 0.067 [0.058 - 0.076]         | 0.000 [0.000 - 0.013]       | 0.026 [0.022 - 0.031]    | 0.061 [0.053 - 0.070]         |
| -1          | 0.008 [0.005 - 0.014]       | 0.027 [0.024 - 0.030]    | 0.071 [0.062 - 0.081]         | 0.000 [0.000 - 0.013]       | 0.028 [0.024 - 0.033]    | 0.064 [0.056 - 0.073]         |
| -0.5        | 0.009 [0.006 - 0.015]       | 0.029 [0.026 - 0.032]    | 0.075 [0.066 - 0.086]         | 0.001 [0.000 - 0.013]       | 0.030 [0.026 - 0.035]    | 0.067 [0.059 - 0.077]         |
| Mean        | 0.011 [0.007 - 0.017]       | 0.031 [0.028 - 0.035]    | 0.080 [0.070 - 0.091]         | 0.001 [0.000 - 0.013]       | 0.032 [0.028 - 0.037]    | 0.071 [0.062 - 0.081]         |
| 0.5         | 0.012 [0.008 - 0.019]       | 0.034 [0.031 - 0.038]    | 0.085 [0.075 - 0.097]         | 0.001 [0.000 - 0.014]       | 0.034 [0.030 - 0.040]    | 0.075 [0.065 - 0.086]         |
| 1           | 0.014 [0.010 - 0.021]       | 0.037 [0.033 - 0.040]    | 0.090 [0.079 - 0.102]         | 0.002 [0.000 - 0.015]       | 0.037 [0.032 - 0.042]    | 0.079 [0.069 - 0.091]         |
| 1.5         | 0.016 [0.011 - 0.023]       | 0.040 [0.036 - 0.044]    | 0.095 [0.083 - 0.108]         | 0.003 [0.000 - 0.017]       | 0.040 [0.034 - 0.045]    | 0.083 [0.072 - 0.096]         |
| 2           | 0.018 [0.013 - 0.026]       | 0.043 [0.039 - 0.047]    | 0.100 [0.087 - 0.114]         | 0.004 [0.001 - 0.019]       | 0.042 [0.037 - 0.049]    | 0.088 [0.076 - 0.102]         |
| 2.5         | 0.021 [0.014 - 0.029]       | 0.047 [0.043 - 0.051]    | 0.105 [0.092 - 0.121]         | 0.005 [0.001 - 0.022]       | 0.045 [0.039 - 0.052]    | 0.093 [0.079 - 0.108]         |
| 3           | 0.023 [0.016 - 0.033]       | 0.050 [0.046 - 0.055]    | 0.111 [0.096 - 0.127]         | 0.008 [0.002 - 0.027]       | 0.049 [0.042 - 0.056]    | 0.098 [0.083 - 0.115]         |
| 3.5         | 0.026 [0.018 - 0.036]       | 0.055 [0.050 - 0.060]    | 0.116 [0.100 - 0.134]         | 0.010 [0.003 - 0.032]       | 0.052 [0.045 - 0.060]    | 0.103 [0.086 - 0.122]         |
| 4           | 0.028 [0.020 - 0.040]       | 0.059 [0.054 - 0.065]    | 0.121 [0.104 - 0.140]         | 0.013 [0.005 - 0.039]       | 0.056 [0.048 - 0.065]    | 0.108 [0.090 - 0.129]         |
| 4.5         | 0.031 [0.022 - 0.044]       | 0.064 [0.058 - 0.070]    | 0.126 [0.107 - 0.147]         | 0.017 [0.006 - 0.047]       | 0.060 [0.051 - 0.070]    | 0.114 [0.094 - 0.137]         |
| 5           | 0.034 [0.023 - 0.049]       | 0.069 [0.062 - 0.076]    | 0.131 [0.111 - 0.154]         | 0.022 [0.008 - 0.058]       | 0.064 [0.054 - 0.076]    | 0.120 [0.098 - 0.146]         |

## 3.7

## Small for gestational age

| Age         |                             | <25 yrs                  |                               |                             | 25-29 yrs                |                               |
|-------------|-----------------------------|--------------------------|-------------------------------|-----------------------------|--------------------------|-------------------------------|
| Weight gain | Normal weight<br>(n=1,316)  | Underweight<br>(n=697)   | Overweight/Obese<br>(n=313)   | Normal weight<br>(n=12,386) | Underweight<br>(n=3,938) | Overweight/Obese<br>(n=3,236) |
| -5          | 0.081 [0.049 - 0.131]       | 0.066 [0.044 - 0.099]    | 0.039 [0.018 - 0.081]         | 0.081 [0.060 - 0.108]       | 0.060 [0.049 - 0.074]    | 0.023 [0.017 - 0.032]         |
| -4.5        | 0.079 [0.049 - 0.125]       | 0.062 [0.042 - 0.091]    | 0.038 [0.018 - 0.078]         | 0.079 [0.060 - 0.103]       | 0.059 [0.049 - 0.071]    | 0.023 [0.017 - 0.031]         |
| -4          | 0.077 [0.049 - 0.119]       | 0.058 [0.040 - 0.084]    | 0.038 [0.019 - 0.075]         | 0.077 [0.060 - 0.099]       | 0.057 [0.048 - 0.067]    | 0.023 [0.017 - 0.030]         |
| -3.5        | 0.076 [0.050 - 0.114]       | 0.055 [0.038 - 0.078]    | 0.037 [0.019 - 0.072]         | 0.075 [0.060 - 0.095]       | 0.054 [0.046 - 0.064]    | 0.023 [0.017 - 0.029]         |
| -3          | 0.074 [0.050 - 0.109]       | 0.052 [0.037 - 0.073]    | 0.037 [0.019 - 0.070]         | 0.073 [0.059 - 0.091]       | 0.051 [0.044 - 0.060]    | 0.022 [0.017 - 0.029]         |
| -2.5        | 0.073 [0.050 - 0.105]       | 0.049 [0.035 - 0.068]    | 0.037 [0.020 - 0.068]         | 0.071 [0.058 - 0.087]       | 0.048 [0.041 - 0.056]    | 0.022 [0.017 - 0.028]         |
| -2          | 0.071 [0.050 - 0.100]       | 0.046 [0.033 - 0.063]    | 0.036 [0.020 - 0.066]         | 0.068 [0.056 - 0.083]       | 0.045 [0.039 - 0.052]    | 0.022 [0.017 - 0.028]         |
| -1.5        | 0.070 [0.050 - 0.097]       | 0.043 [0.031 - 0.060]    | 0.036 [0.020 - 0.065]         | 0.066 [0.054 - 0.079]       | 0.042 [0.036 - 0.048]    | 0.021 [0.017 - 0.027]         |
| -1          | 0.068 [0.049 - 0.093]       | 0.041 [0.030 - 0.056]    | 0.036 [0.020 - 0.063]         | 0.063 [0.052 - 0.075]       | 0.039 [0.034 - 0.045]    | 0.021 [0.017 - 0.027]         |
| -0.5        | 0.067 [0.049 - 0.090]       | 0.039 [0.028 - 0.053]    | 0.035 [0.020 - 0.063]         | 0.060 [0.050 - 0.072]       | 0.036 [0.031 - 0.042]    | 0.021 [0.016 - 0.026]         |
| Mean        | 0.065 [0.048 - 0.087]       | 0.037 [0.027 - 0.051]    | 0.035 [0.019 - 0.062]         | 0.057 [0.047 - 0.068]       | 0.034 [0.029 - 0.039]    | 0.021 [0.016 - 0.026]         |
| 0.5         | 0.064 [0.048 - 0.085]       | 0.035 [0.025 - 0.048]    | 0.035 [0.019 - 0.062]         | 0.054 [0.045 - 0.064]       | 0.032 [0.027 - 0.037]    | 0.020 [0.016 - 0.026]         |
| 1           | 0.063 [0.047 - 0.083]       | 0.033 [0.024 - 0.046]    | 0.034 [0.019 - 0.062]         | 0.051 [0.042 - 0.061]       | 0.030 [0.026 - 0.035]    | 0.020 [0.015 - 0.026]         |
| 1.5         | 0.061 [0.046 - 0.082]       | 0.032 [0.023 - 0.044]    | 0.034 [0.018 - 0.063]         | 0.048 [0.040 - 0.058]       | 0.028 [0.024 - 0.033]    | 0.020 [0.015 - 0.026]         |
| 2           | 0.060 [0.044 - 0.081]       | 0.031 [0.022 - 0.043]    | 0.034 [0.018 - 0.064]         | 0.046 [0.038 - 0.056]       | 0.027 [0.023 - 0.032]    | 0.020 [0.015 - 0.026]         |
| 2.5         | 0.059 [0.043 - 0.080]       | 0.030 [0.021 - 0.042]    | 0.033 [0.017 - 0.065]         | 0.044 [0.036 - 0.054]       | 0.027 [0.022 - 0.031]    | 0.019 [0.014 - 0.026]         |
| 3           | 0.057 [0.041 - 0.079]       | 0.028 [0.020 - 0.041]    | 0.033 [0.016 - 0.066]         | 0.043 [0.035 - 0.053]       | 0.026 [0.022 - 0.031]    | 0.019 [0.014 - 0.026]         |
| 3.5         | 0.056 [0.040 - 0.079]       | 0.027 [0.019 - 0.040]    | 0.033 [0.016 - 0.067]         | 0.042 [0.033 - 0.052]       | 0.026 [0.021 - 0.031]    | 0.019 [0.013 - 0.026]         |
| 4           | 0.055 [0.038 - 0.078]       | 0.027 [0.018 - 0.039]    | 0.032 [0.015 - 0.069]         | 0.041 [0.032 - 0.051]       | 0.025 [0.021 - 0.031]    | 0.019 [0.013 - 0.027]         |
| 4.5         | 0.054 [0.037 - 0.078]       | 0.026 [0.017 - 0.039]    | 0.032 [0.014 - 0.071]         | 0.040 [0.031 - 0.051]       | 0.025 [0.021 - 0.031]    | 0.018 [0.013 - 0.027]         |
| 5           | 0.053 [0.035 - 0.079]       | 0.025 [0.016 - 0.039]    | 0.032 [0.014 - 0.073]         | 0.039 [0.030 - 0.051]       | 0.025 [0.020 - 0.031]    | 0.018 [0.012 - 0.027]         |
| Age         |                             | 30-34 yrs                |                               |                             | >34 yrs                  |                               |
| Weight gain | Normal weight<br>(n=12,275) | Underweight<br>(n=2,458) | Overweight/Obese<br>(n=4,735) | Normal weight<br>(n=5,730)  | Underweight<br>(n=703)   | Overweight/Obese<br>(n=3,208) |
| -5          | 0.097 [0.074 - 0.125]       | 0.049 [0.043 - 0.056]    | 0.026 [0.021 - 0.032]         | 0.094 [0.061 - 0.143]       | 0.035 [0.027 - 0.044]    | 0.020 [0.016 - 0.027]         |
| -4.5        | 0.091 [0.071 - 0.116]       | 0.047 [0.041 - 0.053]    | 0.025 [0.021 - 0.031]         | 0.089 [0.059 - 0.132]       | 0.034 [0.027 - 0.043]    | 0.020 [0.015 - 0.026]         |
| -4          | 0.085 [0.067 - 0.107]       | 0.045 [0.040 - 0.050]    | 0.025 [0.020 - 0.030]         | 0.083 [0.057 - 0.121]       | 0.034 [0.027 - 0.042]    | 0.020 [0.015 - 0.025]         |
| -3.5        | 0.080 [0.064 - 0.099]       | 0.043 [0.038 - 0.048]    | 0.024 [0.020 - 0.029]         | 0.078 [0.054 - 0.111]       | 0.033 [0.027 - 0.040]    | 0.019 [0.015 - 0.025]         |
| -3          | 0.075 [0.061 - 0.093]       | 0.041 [0.037 - 0.045]    | 0.023 [0.019 - 0.028]         | 0.073 [0.052 - 0.103]       | 0.032 [0.026 - 0.039]    | 0.019 [0.015 - 0.024]         |
| -2.5        | 0.071 [0.058 - 0.087]       | 0.039 [0.035 - 0.043]    | 0.022 [0.019 - 0.027]         | 0.069 [0.049 - 0.095]       | 0.031 [0.025 - 0.038]    | 0.018 [0.014 - 0.024]         |
| -2          | 0.067 [0.055 - 0.081]       | 0.037 [0.034 - 0.041]    | 0.022 [0.018 - 0.026]         | 0.065 [0.047 - 0.088]       | 0.030 [0.025 - 0.036]    | 0.018 [0.014 - 0.023]         |
| -1.5        | 0.063 [0.052 - 0.076]       | 0.036 [0.032 - 0.039]    | 0.021 [0.017 - 0.026]         | 0.060 [0.044 - 0.083]       | 0.029 [0.024 - 0.035]    | 0.018 [0.014 - 0.023]         |
| -1          | 0.060 [0.049 - 0.072]       | 0.034 [0.031 - 0.038]    | 0.020 [0.017 - 0.025]         | 0.057 [0.041 - 0.077]       | 0.028 [0.023 - 0.033]    | 0.017 [0.013 - 0.023]         |
| -0.5        | 0.057 [0.047 - 0.068]       | 0.033 [0.030 - 0.036]    | 0.020 [0.016 - 0.024]         | 0.053 [0.038 - 0.073]       | 0.026 [0.022 - 0.032]    | 0.017 [0.013 - 0.023]         |
| Mean        | 0.054 [0.044 - 0.065]       | 0.031 [0.028 - 0.035]    | 0.019 [0.015 - 0.024]         | 0.050 [0.036 - 0.069]       | 0.025 [0.021 - 0.031]    | 0.017 [0.012 - 0.023]         |
| 0.5         | 0.051 [0.042 - 0.062]       | 0.030 [0.027 - 0.033]    | 0.019 [0.015 - 0.023]         | 0.047 [0.033 - 0.066]       | 0.024 [0.020 - 0.030]    | 0.016 [0.012 - 0.023]         |
| 1           | 0.049 [0.040 - 0.059]       | 0.029 [0.026 - 0.032]    | 0.018 [0.014 - 0.023]         | 0.044 [0.030 - 0.063]       | 0.023 [0.018 - 0.028]    | 0.016 [0.011 - 0.023]         |
| 1.5         | 0.046 [0.038 - 0.057]       | 0.027 [0.024 - 0.031]    | 0.017 [0.013 - 0.023]         | 0.041 [0.027 - 0.061]       | 0.022 [0.017 - 0.027]    | 0.016 [0.011 - 0.023]         |
| 2           | 0.044 [0.036 - 0.055]       | 0.026 [0.023 - 0.030]    | 0.017 [0.013 - 0.022]         | 0.038 [0.025 - 0.058]       | 0.021 [0.016 - 0.026]    | 0.015 [0.010 - 0.023]         |
| 2.5         | 0.042 [0.034 - 0.053]       | 0.025 [0.022 - 0.028]    | 0.016 [0.012 - 0.022]         | 0.036 [0.023 - 0.056]       | 0.020 [0.015 - 0.026]    | 0.015 [0.010 - 0.023]         |
| 3           | 0.041 [0.032 - 0.052]       | 0.024 [0.021 - 0.027]    | 0.016 [0.012 - 0.022]         | 0.033 [0.020 - 0.055]       | 0.019 [0.014 - 0.025]    | 0.015 [0.010 - 0.023]         |
| 3.5         | 0.039 [0.030 - 0.051]       | 0.023 [0.020 - 0.026]    | 0.015 [0.011 - 0.021]         | 0.031 [0.018 - 0.053]       | 0.018 [0.013 - 0.024]    | 0.014 [0.009 - 0.023]         |
| 4           | 0.038 [0.029 - 0.050]       | 0.022 [0.018 - 0.026]    | 0.015 [0.011 - 0.021]         | 0.029 [0.017 - 0.051]       | 0.017 [0.012 - 0.024]    | 0.014 [0.009 - 0.023]         |
| 4.5         | 0.037 [0.027 - 0.049]       | 0.021 [0.017 - 0.025]    | 0.014 [0.010 - 0.021]         | 0.027 [0.015 - 0.050]       | 0.016 [0.011 - 0.023]    | 0.014 [0.008 - 0.023]         |
| 5           | 0.035 [0.026 - 0.049]       | 0.020 [0.017 - 0.024]    | 0.014 [0.010 - 0.020]         | 0.026 [0.013 - 0.048]       | 0.015 [0.010 - 0.023]    | 0.014 [0.008 - 0.023]         |

### 3.8

#### Large for gestational age

| Age         |                             | <25 yrs                  |                               |                             | 25-29 yrs                |                               |
|-------------|-----------------------------|--------------------------|-------------------------------|-----------------------------|--------------------------|-------------------------------|
| Weight gain | Normal weight<br>(n=1,316)  | Underweight<br>(n=697)   | Overweight/Obese<br>(n=313)   | Normal weight<br>(n=12,386) | Underweight<br>(n=3,938) | Overweight/Obese<br>(n=3,236) |
| -5          | 0.116 [0.071 - 0.182]       | 0.157 [0.115 - 0.211]    | 0.214 [0.147 - 0.302]         | 0.074 [0.056 - 0.098]       | 0.107 [0.095 - 0.122]    | 0.175 [0.157 - 0.195]         |
| -4.5        | 0.110 [0.070 - 0.170]       | 0.147 [0.109 - 0.196]    | 0.215 [0.149 - 0.300]         | 0.071 [0.055 - 0.092]       | 0.106 [0.094 - 0.118]    | 0.178 [0.160 - 0.196]         |
| -4          | 0.105 [0.068 - 0.159]       | 0.138 [0.104 - 0.182]    | 0.215 [0.151 - 0.297]         | 0.068 [0.054 - 0.087]       | 0.104 [0.093 - 0.115]    | 0.180 [0.163 - 0.198]         |
| -3.5        | 0.101 [0.067 - 0.149]       | 0.130 [0.098 - 0.170]    | 0.213 [0.151 - 0.292]         | 0.066 [0.053 - 0.083]       | 0.103 [0.093 - 0.113]    | 0.183 [0.167 - 0.200]         |
| -3          | 0.096 [0.065 - 0.140]       | 0.122 [0.093 - 0.159]    | 0.210 [0.150 - 0.287]         | 0.065 [0.052 - 0.079]       | 0.102 [0.092 - 0.112]    | 0.186 [0.170 - 0.202]         |
| -2.5        | 0.092 [0.063 - 0.132]       | 0.116 [0.089 - 0.149]    | 0.206 [0.148 - 0.280]         | 0.063 [0.052 - 0.077]       | 0.101 [0.092 - 0.110]    | 0.189 [0.173 - 0.205]         |
| -2          | 0.088 [0.061 - 0.124]       | 0.109 [0.084 - 0.141]    | 0.201 [0.144 - 0.273]         | 0.063 [0.052 - 0.075]       | 0.101 [0.093 - 0.110]    | 0.192 [0.176 - 0.208]         |
| -1.5        | 0.084 [0.059 - 0.118]       | 0.104 [0.081 - 0.133]    | 0.195 [0.140 - 0.265]         | 0.062 [0.052 - 0.074]       | 0.101 [0.093 - 0.110]    | 0.195 [0.180 - 0.211]         |
| -1          | 0.080 [0.057 - 0.112]       | 0.099 [0.077 - 0.127]    | 0.189 [0.136 - 0.257]         | 0.063 [0.053 - 0.074]       | 0.102 [0.094 - 0.110]    | 0.198 [0.183 - 0.214]         |
| -0.5        | 0.077 [0.055 - 0.107]       | 0.096 [0.075 - 0.122]    | 0.183 [0.131 - 0.249]         | 0.063 [0.054 - 0.074]       | 0.103 [0.096 - 0.111]    | 0.201 [0.186 - 0.217]         |
| Mean        | 0.074 [0.053 - 0.103]       | 0.093 [0.072 - 0.118]    | 0.177 [0.126 - 0.242]         | 0.064 [0.055 - 0.075]       | 0.105 [0.098 - 0.113]    | 0.205 [0.190 - 0.221]         |
| 0.5         | 0.072 [0.051 - 0.099]       | 0.090 [0.071 - 0.115]    | 0.171 [0.122 - 0.235]         | 0.066 [0.057 - 0.077]       | 0.108 [0.100 - 0.116]    | 0.209 [0.193 - 0.225]         |
| 1           | 0.069 [0.050 - 0.096]       | 0.089 [0.070 - 0.113]    | 0.166 [0.117 - 0.229]         | 0.068 [0.058 - 0.079]       | 0.111 [0.103 - 0.119]    | 0.212 [0.196 - 0.229]         |
| 1.5         | 0.067 [0.048 - 0.093]       | 0.089 [0.070 - 0.113]    | 0.161 [0.113 - 0.225]         | 0.070 [0.061 - 0.081]       | 0.115 [0.107 - 0.123]    | 0.216 [0.200 - 0.234]         |
| 2           | 0.066 [0.047 - 0.092]       | 0.090 [0.071 - 0.114]    | 0.157 [0.109 - 0.221]         | 0.073 [0.063 - 0.084]       | 0.119 [0.111 - 0.128]    | 0.220 [0.203 - 0.238]         |
| 2.5         | 0.065 [0.046 - 0.091]       | 0.092 [0.073 - 0.117]    | 0.154 [0.106 - 0.219]         | 0.076 [0.065 - 0.088]       | 0.124 [0.115 - 0.133]    | 0.224 [0.207 - 0.243]         |
| 3           | 0.064 [0.046 - 0.091]       | 0.096 [0.075 - 0.121]    | 0.153 [0.104 - 0.218]         | 0.079 [0.068 - 0.092]       | 0.129 [0.120 - 0.138]    | 0.229 [0.210 - 0.248]         |
| 3.5         | 0.064 [0.045 - 0.091]       | 0.100 [0.079 - 0.127]    | 0.152 [0.102 - 0.219]         | 0.083 [0.071 - 0.096]       | 0.135 [0.125 - 0.145]    | 0.233 [0.213 - 0.254]         |
| 4           | 0.065 [0.045 - 0.093]       | 0.106 [0.083 - 0.135]    | 0.152 [0.101 - 0.221]         | 0.087 [0.075 - 0.101]       | 0.140 [0.130 - 0.151]    | 0.238 [0.217 - 0.260]         |
| 4.5         | 0.066 [0.045 - 0.095]       | 0.114 [0.089 - 0.144]    | 0.153 [0.101 - 0.225]         | 0.091 [0.078 - 0.107]       | 0.146 [0.135 - 0.158]    | 0.242 [0.220 - 0.266]         |
| 5           | 0.068 [0.046 - 0.098]       | 0.123 [0.096 - 0.156]    | 0.155 [0.101 - 0.231]         | 0.096 [0.081 - 0.113]       | 0.153 [0.141 - 0.165]    | 0.247 [0.223 - 0.273]         |
| Age         |                             | 30-34 yrs                |                               |                             | >34 yrs                  |                               |
| Weight gain | Normal weight<br>(n=12,275) | Underweight<br>(n=2,458) | Overweight/Obese<br>(n=4,735) | Normal weight<br>(n=5,730)  | Underweight<br>(n=703)   | Overweight/Obese<br>(n=3,208) |
| -5          | 0.068 [0.050 - 0.093]       | 0.101 [0.091 - 0.113]    | 0.180 [0.165 - 0.197]         | 0.080 [0.049 - 0.129]       | 0.138 [0.123 - 0.154]    | 0.215 [0.198 - 0.234]         |
| -4.5        | 0.069 [0.052 - 0.091]       | 0.102 [0.093 - 0.112]    | 0.183 [0.168 - 0.199]         | 0.077 [0.048 - 0.120]       | 0.138 [0.124 - 0.153]    | 0.218 [0.201 - 0.236]         |
| -4          | 0.070 [0.054 - 0.090]       | 0.103 [0.094 - 0.113]    | 0.186 [0.171 - 0.201]         | 0.074 [0.048 - 0.113]       | 0.139 [0.126 - 0.153]    | 0.221 [0.204 - 0.239]         |
| -3.5        | 0.070 [0.056 - 0.089]       | 0.104 [0.096 - 0.113]    | 0.189 [0.175 - 0.204]         | 0.072 [0.048 - 0.107]       | 0.139 [0.127 - 0.153]    | 0.224 [0.207 - 0.242]         |
| -3          | 0.071 [0.057 - 0.088]       | 0.106 [0.098 - 0.115]    | 0.193 [0.179 - 0.208]         | 0.071 [0.048 - 0.103]       | 0.140 [0.129 - 0.153]    | 0.227 [0.210 - 0.245]         |
| -2.5        | 0.072 [0.059 - 0.088]       | 0.108 [0.100 - 0.116]    | 0.197 [0.183 - 0.211]         | 0.070 [0.048 - 0.100]       | 0.142 [0.130 - 0.154]    | 0.230 [0.213 - 0.248]         |
| -2          | 0.073 [0.061 - 0.088]       | 0.110 [0.103 - 0.118]    | 0.201 [0.187 - 0.216]         | 0.070 [0.049 - 0.099]       | 0.143 [0.132 - 0.155]    | 0.234 [0.217 - 0.251]         |
| -1.5        | 0.074 [0.062 - 0.089]       | 0.113 [0.106 - 0.121]    | 0.206 [0.192 - 0.221]         | 0.070 [0.050 - 0.098]       | 0.145 [0.134 - 0.157]    | 0.237 [0.220 - 0.255]         |
| -1          | 0.076 [0.064 - 0.090]       | 0.116 [0.109 - 0.124]    | 0.211 [0.196 - 0.226]         | 0.071 [0.051 - 0.099]       | 0.147 [0.136 - 0.159]    | 0.241 [0.223 - 0.259]         |
| -0.5        | 0.078 [0.066 - 0.091]       | 0.120 [0.112 - 0.128]    | 0.216 [0.201 - 0.231]         | 0.073 [0.053 - 0.101]       | 0.149 [0.138 - 0.161]    | 0.245 [0.227 - 0.263]         |
| Mean        | 0.080 [0.068 - 0.093]       | 0.124 [0.116 - 0.131]    | 0.222 [0.207 - 0.237]         | 0.076 [0.055 - 0.104]       | 0.152 [0.141 - 0.164]    | 0.249 [0.230 - 0.268]         |
| 0.5         | 0.082 [0.070 - 0.095]       | 0.128 [0.120 - 0.136]    | 0.227 [0.212 - 0.244]         | 0.080 [0.058 - 0.109]       | 0.155 [0.144 - 0.167]    | 0.253 [0.234 - 0.273]         |
| 1           | 0.084 [0.072 - 0.098]       | 0.132 [0.124 - 0.140]    | 0.234 [0.217 - 0.250]         | 0.084 [0.062 - 0.114]       | 0.158 [0.147 - 0.171]    | 0.257 [0.237 - 0.278]         |
| 1.5         | 0.087 [0.074 - 0.101]       | 0.136 [0.128 - 0.145]    | 0.240 [0.223 - 0.258]         | 0.090 [0.066 - 0.121]       | 0.162 [0.150 - 0.175]    | 0.262 [0.241 - 0.284]         |
| 2           | 0.090 [0.077 - 0.104]       | 0.141 [0.133 - 0.150]    | 0.246 [0.229 - 0.265]         | 0.096 [0.070 - 0.128]       | 0.166 [0.153 - 0.180]    | 0.267 [0.244 - 0.290]         |
| 2.5         | 0.093 [0.080 - 0.108]       | 0.146 [0.137 - 0.155]    | 0.253 [0.234 - 0.273]         | 0.102 [0.076 - 0.137]       | 0.170 [0.157 - 0.185]    | 0.272 [0.248 - 0.297]         |
| 3           | 0.097 [0.082 - 0.113]       | 0.151 [0.142 - 0.161]    | 0.260 [0.240 - 0.281]         | 0.110 [0.081 - 0.147]       | 0.175 [0.160 - 0.190]    | 0.277 [0.252 - 0.304]         |
| 3.5         | 0.100 [0.085 - 0.118]       | 0.156 [0.146 - 0.167]    | 0.267 [0.246 - 0.290]         | 0.118 [0.087 - 0.158]       | 0.179 [0.164 - 0.196]    | 0.282 [0.256 - 0.311]         |
| 4           | 0.105 [0.088 - 0.123]       | 0.162 [0.151 - 0.173]    | 0.275 [0.252 - 0.299]         | 0.126 [0.092 - 0.170]       | 0.184 [0.168 - 0.202]    | 0.288 [0.259 - 0.319]         |
| 4.5         | 0.109 [0.092 - 0.130]       | 0.168 [0.156 - 0.180]    | 0.282 [0.257 - 0.308]         | 0.134 [0.097 - 0.183]       | 0.189 [0.172 - 0.208]    | 0.294 [0.263 - 0.328]         |
| 5           | 0.114 [0.095 - 0.137]       | 0.174 [0.161 - 0.188]    | 0.289 [0.262 - 0.318]         | 0.143 [0.102 - 0.196]       | 0.195 [0.175 - 0.216]    | 0.300 [0.266 - 0.337]         |

## 3.9

## All disease

| Age         |                             | <25 yrs                  |                               |                             | 25-29 yrs                |                               |
|-------------|-----------------------------|--------------------------|-------------------------------|-----------------------------|--------------------------|-------------------------------|
| Weight gain | Normal weight<br>(n=1,324)  | Underweight<br>(n=698)   | Overweight/Obese<br>(n=314)   | Normal weight<br>(n=12,406) | Underweight<br>(n=3,943) | Overweight/Obese<br>(n=3,249) |
| -5          | 0.472 [0.369 - 0.578]       | 0.438 [0.370 - 0.507]    | 0.572 [0.481 - 0.658]         | 0.412 [0.364 - 0.463]       | 0.469 [0.444 - 0.495]    | 0.544 [0.511 - 0.577]         |
| -4.5        | 0.434 [0.342 - 0.532]       | 0.410 [0.349 - 0.475]    | 0.555 [0.468 - 0.639]         | 0.381 [0.339 - 0.426]       | 0.443 [0.420 - 0.466]    | 0.530 [0.499 - 0.561]         |
| -4          | 0.399 [0.317 - 0.488]       | 0.385 [0.328 - 0.445]    | 0.538 [0.454 - 0.620]         | 0.355 [0.317 - 0.396]       | 0.417 [0.396 - 0.438]    | 0.517 [0.488 - 0.547]         |
| -3.5        | 0.367 [0.293 - 0.448]       | 0.360 [0.308 - 0.416]    | 0.522 [0.440 - 0.602]         | 0.333 [0.298 - 0.370]       | 0.392 [0.373 - 0.411]    | 0.505 [0.476 - 0.533]         |
| -3          | 0.339 [0.272 - 0.412]       | 0.338 [0.289 - 0.390]    | 0.505 [0.426 - 0.584]         | 0.314 [0.282 - 0.348]       | 0.368 [0.350 - 0.385]    | 0.493 [0.465 - 0.520]         |
| -2.5        | 0.313 [0.252 - 0.380]       | 0.316 [0.271 - 0.365]    | 0.489 [0.413 - 0.567]         | 0.298 [0.269 - 0.329]       | 0.345 [0.328 - 0.361]    | 0.481 [0.454 - 0.508]         |
| -2          | 0.290 [0.234 - 0.352]       | 0.297 [0.255 - 0.343]    | 0.474 [0.399 - 0.550]         | 0.284 [0.257 - 0.312]       | 0.323 [0.308 - 0.339]    | 0.470 [0.444 - 0.496]         |
| -1.5        | 0.269 [0.218 - 0.327]       | 0.280 [0.240 - 0.323]    | 0.459 [0.385 - 0.534]         | 0.271 [0.246 - 0.297]       | 0.304 [0.290 - 0.319]    | 0.459 [0.433 - 0.485]         |
| -1          | 0.251 [0.204 - 0.305]       | 0.265 [0.227 - 0.306]    | 0.445 [0.373 - 0.519]         | 0.259 [0.235 - 0.284]       | 0.287 [0.274 - 0.301]    | 0.448 [0.423 - 0.474]         |
| -0.5        | 0.235 [0.191 - 0.286]       | 0.251 [0.215 - 0.291]    | 0.431 [0.360 - 0.505]         | 0.248 [0.225 - 0.272]       | 0.273 [0.260 - 0.286]    | 0.438 [0.413 - 0.464]         |
| Mean        | 0.221 [0.179 - 0.269]       | 0.240 [0.206 - 0.278]    | 0.418 [0.349 - 0.492]         | 0.237 [0.216 - 0.260]       | 0.262 [0.249 - 0.274]    | 0.429 [0.404 - 0.454]         |
| 0.5         | 0.209 [0.168 - 0.255]       | 0.231 [0.198 - 0.267]    | 0.407 [0.338 - 0.480]         | 0.228 [0.207 - 0.250]       | 0.253 [0.241 - 0.266]    | 0.420 [0.395 - 0.446]         |
| 1           | 0.198 [0.159 - 0.244]       | 0.224 [0.192 - 0.260]    | 0.397 [0.328 - 0.470]         | 0.220 [0.200 - 0.241]       | 0.248 [0.236 - 0.260]    | 0.412 [0.386 - 0.439]         |
| 1.5         | 0.189 [0.151 - 0.234]       | 0.219 [0.188 - 0.254]    | 0.388 [0.319 - 0.462]         | 0.214 [0.194 - 0.235]       | 0.245 [0.233 - 0.257]    | 0.406 [0.379 - 0.433]         |
| 2           | 0.182 [0.145 - 0.226]       | 0.217 [0.185 - 0.252]    | 0.380 [0.311 - 0.455]         | 0.210 [0.190 - 0.231]       | 0.244 [0.232 - 0.257]    | 0.400 [0.373 - 0.428]         |
| 2.5         | 0.176 [0.139 - 0.220]       | 0.216 [0.184 - 0.252]    | 0.374 [0.304 - 0.450]         | 0.208 [0.188 - 0.230]       | 0.245 [0.233 - 0.258]    | 0.395 [0.368 - 0.424]         |
| 3           | 0.172 [0.135 - 0.216]       | 0.218 [0.186 - 0.255]    | 0.369 [0.298 - 0.446]         | 0.208 [0.187 - 0.231]       | 0.248 [0.235 - 0.261]    | 0.392 [0.363 - 0.421]         |
| 3.5         | 0.169 [0.132 - 0.214]       | 0.223 [0.189 - 0.260]    | 0.365 [0.293 - 0.444]         | 0.211 [0.189 - 0.234]       | 0.251 [0.237 - 0.265]    | 0.389 [0.359 - 0.420]         |
| 4           | 0.168 [0.130 - 0.215]       | 0.229 [0.194 - 0.268]    | 0.363 [0.288 - 0.444]         | 0.214 [0.192 - 0.238]       | 0.255 [0.240 - 0.270]    | 0.387 [0.356 - 0.420]         |
| 4.5         | 0.169 [0.130 - 0.217]       | 0.238 [0.201 - 0.278]    | 0.361 [0.285 - 0.445]         | 0.218 [0.195 - 0.244]       | 0.259 [0.244 - 0.274]    | 0.387 [0.353 - 0.421]         |
| 5           | 0.171 [0.130 - 0.221]       | 0.249 [0.210 - 0.292]    | 0.361 [0.282 - 0.448]         | 0.223 [0.197 - 0.251]       | 0.263 [0.247 - 0.279]    | 0.387 [0.352 - 0.423]         |
| Age         |                             | 30-34 yrs                |                               |                             | >34 yrs                  |                               |
| Weight gain | Normal weight<br>(n=12,302) | Underweight<br>(n=2,460) | Overweight/Obese<br>(n=4,749) | Normal weight<br>(n=5,750)  | Underweight<br>(n=704)   | Overweight/Obese<br>(n=3,221) |
| -5          | 0.522 [0.467 - 0.577]       | 0.512 [0.489 - 0.534]    | 0.599 [0.572 - 0.626]         | 0.596 [0.508 - 0.677]       | 0.604 [0.575 - 0.632]    | 0.666 [0.638 - 0.692]         |
| -4.5        | 0.489 [0.440 - 0.539]       | 0.483 [0.462 - 0.504]    | 0.579 [0.553 - 0.604]         | 0.561 [0.482 - 0.637]       | 0.573 [0.546 - 0.600]    | 0.646 [0.618 - 0.672]         |
| -4          | 0.458 [0.413 - 0.504]       | 0.457 [0.438 - 0.476]    | 0.559 [0.534 - 0.583]         | 0.527 [0.455 - 0.598]       | 0.543 [0.517 - 0.569]    | 0.626 [0.599 - 0.652]         |
| -3.5        | 0.429 [0.388 - 0.471]       | 0.433 [0.415 - 0.451]    | 0.539 [0.515 - 0.562]         | 0.495 [0.429 - 0.561]       | 0.514 [0.489 - 0.538]    | 0.607 [0.581 - 0.633]         |
| -3          | 0.403 [0.366 - 0.442]       | 0.411 [0.395 - 0.428]    | 0.519 [0.496 - 0.542]         | 0.465 [0.404 - 0.527]       | 0.486 [0.463 - 0.509]    | 0.589 [0.563 - 0.615]         |
| -2.5        | 0.379 [0.345 - 0.415]       | 0.393 [0.377 - 0.408]    | 0.501 [0.477 - 0.524]         | 0.437 [0.380 - 0.497]       | 0.459 [0.437 - 0.482]    | 0.573 [0.547 - 0.599]         |
| -2          | 0.358 [0.326 - 0.391]       | 0.376 [0.361 - 0.391]    | 0.483 [0.460 - 0.506]         | 0.412 [0.357 - 0.469]       | 0.435 [0.413 - 0.456]    | 0.558 [0.531 - 0.584]         |
| -1.5        | 0.339 [0.309 - 0.369]       | 0.361 [0.347 - 0.376]    | 0.466 [0.443 - 0.489]         | 0.389 [0.337 - 0.444]       | 0.412 [0.391 - 0.434]    | 0.544 [0.517 - 0.571]         |
| -1          | 0.321 [0.294 - 0.350]       | 0.348 [0.334 - 0.362]    | 0.450 [0.427 - 0.473]         | 0.369 [0.319 - 0.422]       | 0.393 [0.373 - 0.414]    | 0.532 [0.505 - 0.559]         |
| -0.5        | 0.305 [0.279 - 0.333]       | 0.337 [0.323 - 0.350]    | 0.437 [0.414 - 0.460]         | 0.352 [0.304 - 0.404]       | 0.377 [0.358 - 0.398]    | 0.522 [0.494 - 0.549]         |
| Mean        | 0.291 [0.265 - 0.318]       | 0.326 [0.313 - 0.340]    | 0.425 [0.402 - 0.448]         | 0.338 [0.290 - 0.389]       | 0.365 [0.345 - 0.386]    | 0.513 [0.485 - 0.541]         |
| 0.5         | 0.277 [0.252 - 0.304]       | 0.317 [0.304 - 0.331]    | 0.415 [0.392 - 0.439]         | 0.326 [0.278 - 0.377]       | 0.356 [0.336 - 0.377]    | 0.506 [0.477 - 0.535]         |
| 1           | 0.265 [0.240 - 0.292]       | 0.309 [0.296 - 0.323]    | 0.408 [0.385 - 0.433]         | 0.317 [0.269 - 0.368]       | 0.351 [0.330 - 0.372]    | 0.501 [0.470 - 0.531]         |
| 1.5         | 0.254 [0.230 - 0.281]       | 0.302 [0.289 - 0.315]    | 0.404 [0.379 - 0.429]         | 0.310 [0.263 - 0.361]       | 0.348 [0.328 - 0.370]    | 0.496 [0.465 - 0.528]         |
| 2           | 0.245 [0.220 - 0.271]       | 0.296 [0.282 - 0.309]    | 0.402 [0.376 - 0.429]         | 0.306 [0.258 - 0.358]       | 0.348 [0.327 - 0.370]    | 0.493 [0.460 - 0.526]         |
| 2.5         | 0.237 [0.212 - 0.264]       | 0.290 [0.277 - 0.305]    | 0.403 [0.376 - 0.430]         | 0.304 [0.256 - 0.357]       | 0.350 [0.328 - 0.373]    | 0.491 [0.457 - 0.526]         |
| 3           | 0.231 [0.205 - 0.259]       | 0.286 [0.272 - 0.301]    | 0.405 [0.377 - 0.434]         | 0.304 [0.255 - 0.359]       | 0.354 [0.330 - 0.378]    | 0.490 [0.454 - 0.526]         |
| 3.5         | 0.227 [0.200 - 0.256]       | 0.284 [0.268 - 0.299]    | 0.410 [0.380 - 0.440]         | 0.306 [0.255 - 0.363]       | 0.357 [0.332 - 0.384]    | 0.490 [0.452 - 0.528]         |
| 4           | 0.224 [0.197 - 0.255]       | 0.282 [0.266 - 0.298]    | 0.415 [0.384 - 0.447]         | 0.310 [0.256 - 0.370]       | 0.361 [0.334 - 0.389]    | 0.491 [0.450 - 0.531]         |
| 4.5         | 0.224 [0.195 - 0.257]       | 0.282 [0.265 - 0.299]    | 0.422 [0.387 - 0.456]         | 0.315 [0.257 - 0.379]       | 0.364 [0.336 - 0.394]    | 0.492 [0.448 - 0.535]         |
| 5           | 0.226 [0.195 - 0.261]       | 0.283 [0.265 - 0.302]    | 0.428 [0.391 - 0.466]         | 0.321 [0.259 - 0.390]       | 0.366 [0.336 - 0.398]    | 0.493 [0.446 - 0.540]         |
